1 Small molecule SWELL1-LRRC8 complex induction improves glycemic control and nonalcoholic  
2 fatty liver disease in murine Type 2 diabetes

3

4 Susheel K. Gunasekar<sup>#1</sup>, Litao Xie<sup>#1</sup>, Pratik R. Chheda<sup>2</sup>, Chen Kang<sup>1</sup>, David M. Kern<sup>3,4</sup>, Chau  
5 My-Ta<sup>5</sup>, Ashutosh Kumar<sup>1</sup>, Joshua Maurer<sup>1</sup>, Eva E. Gerber<sup>3,4</sup>, Wojciech J. Grzesik<sup>6</sup>, Macaulay  
6 Elliot-Hudson<sup>7</sup>, Yanhui Zhang<sup>8</sup>, Chaitanya A. Kulkarni<sup>2</sup>, Isaac Samuel<sup>9</sup>, Jessica K. Smith<sup>9</sup>, Peter  
7 Nau<sup>9</sup>, Yumi Imai<sup>7</sup>, Ryan D. Sheldon<sup>10</sup>, Eric B. Taylor<sup>10</sup>, Daniel J. Lerner<sup>11</sup>, Andrew W. Norris<sup>6</sup>,  
8 Stephen G. Brohawn<sup>3,4</sup>, Robert Kerns<sup>2</sup>, and Rajan Sah<sup>\*1</sup>

9 <sup>#</sup>co-first authors

10

11 <sup>1</sup>Department of Internal Medicine, Cardiovascular Division, Washington University School of  
12 Medicine, St. Louis, MO, USA.

13 <sup>2</sup>Department of Pharmaceutical Sciences and Experimental Therapeutics, University of Iowa,  
14 College of Pharmacy, Iowa City, IA, USA.

15 <sup>3</sup>Department of Molecular & Cell Biology, University of California Berkeley, Berkeley, CA, USA.

16 <sup>4</sup>Helen Wills Neuroscience Institute, University of California Berkeley, Berkeley, CA, USA.

17 <sup>5</sup>Feinberg School of Medicine, Northwestern University, Chicago, IL, USA.

18 <sup>6</sup>Stead Family Department of Pediatrics, Endocrinology and Diabetes Division, Fraternal Order  
19 of Eagles Diabetes Research Center, University of Iowa, Iowa City, IA, USA.

20 <sup>7</sup>Department of Internal Medicine, Cardiovascular Division, University of Iowa, Iowa City, IA,  
21 USA.

22 <sup>8</sup>Xiamen Cardiovascular Hospital, Xiamen University, Xiamen, China.

23 <sup>9</sup>Department of Surgery, University of Iowa, Carver College of Medicine, Iowa City, IA, USA.

24 <sup>10</sup>Department of Biochemistry, University of Iowa, Iowa City, IA, USA

25 <sup>11</sup>Senseion Therapeutics Inc., St Louis, MO.

26

27 \*Correspondence and Lead Contact:

28 Dr. Rajan Sah

29 Associate Professor of Medicine

30 425 S. Euclid Ave

31 Washington University School of Medicine

32 BJICH 9609

33 St. Louis, MO 63110

34 Email: [rajan.sah@wustl.edu](mailto:rajan.sah@wustl.edu)

35

36 **Abstract**

37

38 Type 2 diabetes (T2D) is associated with insulin resistance, impaired insulin secretion from the  
39 pancreatic  $\beta$ -cell, and nonalcoholic fatty liver disease (NAFLD). SWELL1 (LRRC8a) ablation  
40 impairs adipose and skeletal muscle insulin-pAKT2 signaling,  $\beta$ -cell insulin secretion and glycemic  
41 control - suggesting that SWELL1-LRRC8 complex dysfunction contributes to T2D pathogenesis.  
42 Here, we show that  $I_{CI,SWELL}$  and SWELL1 protein are reduced in adipose and  $\beta$ -cells in murine  
43 and human T2D. Combining cryo-electron microscopy, molecular docking, medicinal chemistry,  
44 and functional studies, we define a structure activity relationship to rationally-designed active  
45 derivatives (SN-40X) of a SWELL1 channel inhibitor (DCPIB/SN-401), that bind the SWELL1-  
46 LRRC8 hexameric complex, restore SWELL1-LRRC8 protein, plasma membrane trafficking,  
47 signaling and islet insulin secretion via SWELL1-dependent mechanisms. *In vivo*, SN-401 and  
48 active SN-40X compounds restore glycemic control and prevents NAFLD by improving insulin-  
49 sensitivity and insulin secretion in murine T2D. These findings demonstrate that small molecule  
50 SWELL1 modulators restore SWELL1-dependent insulin-sensitivity and insulin secretion in T2D  
51 and may represent a first-in-class therapeutic approach for T2D and NAFLD.

52

53

54



## 55 Introduction

56 Type 2 diabetes mellitus (T2D) is a globally ubiquitous metabolic disease characterized by  
57 hyperglycemia that is caused by reduced insulin sensitivity in target tissues and impaired insulin  
58 secretion from pancreatic  $\beta$ -cells<sup>1-3</sup>. T2D accounts for 90-95% of all diabetes mellitus in the US,  
59 or about 24 M people<sup>4</sup>. It is associated with increased risk of cardiovascular disease, renal  
60 disease, liver disease, cancer, and infection and a hazard ratio for all-cause mortality of 1.80  
61 compared to patients without T2D<sup>5,6</sup>. The cost of medical care for patients with diabetes is 2.3-  
62 fold the cost in non-diabetics. In 2017, the direct medical cost of diabetes in the US was \$237B<sup>7</sup>.

63  
64 There are at least ten distinct classes of medications approved to treat T2D: sulfonylureas,  
65 meglitinides, amylin mimetics, biguanides, alpha-glucosidase inhibitors, thiazolidinediones,  
66 glucagon-like peptide-1 analogs (GLP-1a), dipeptidyl peptidase-4 inhibitors (DPPi), sodium-  
67 glucose co-transporter (SGLT)-2 inhibitors (SGLT2i), and insulin. Despite this diverse array of  
68 T2D medications, there are several reasons why new medications for T2D are needed. First,  
69 cardiovascular disease (CVD) is the leading cause of death in diabetics<sup>8,9</sup>, and although newer  
70 T2D medications like SGLT2i and GLP-1a effect a reduction in CVD mortality, significant residual  
71 CVD mortality remains<sup>10</sup>, which presents a therapeutic opportunity for T2D medications with novel  
72 mechanisms of action. Second, 25-33% of T2D patients have inadequate glycemic control, with  
73 HbA1c levels above guideline recommendations<sup>6,11-14</sup>. This poor glucose control is associated  
74 with increasing risk of death from vascular causes, non-vascular causes and cancer<sup>8</sup>. Third, T2D  
75 medication-induced hypoglycemia remains a significant problem for patients with T2D, especially  
76 with patients on multiple T2D medications<sup>4 15,16</sup>. For all these reasons, there remains sustained  
77 interest in developing new T2D and metabolic syndrome therapeutics, especially with novel  
78 mechanisms of action<sup>17</sup>.

79  
80 *SWELL1* or *LRRC8a* (Leucine-Rich Repeat Containing Protein 8a) encodes a transmembrane

81 protein first described in 2003 as the site of a balanced translocation in an immunodeficient child  
82 with agammaglobulinemia and absent B-cells<sup>18,19</sup>. Subsequent work revealed that this condition  
83 was caused by impaired SWELL1-dependent GRB2-PI3K-AKT signaling in lymphocytes,  
84 resulting in a developmental block in lymphocyte differentiation<sup>20</sup>. So, for about a decade,  
85 SWELL1 was considered a membrane protein that regulates PI3K-AKT mediated lymphocyte  
86 function<sup>18,19</sup>, and it was not until 2014 that SWELL1/LRRC8a was discovered to also form an  
87 essential component of the volume-regulated anion channel (VRAC)<sup>21,22</sup>, forming hetero-  
88 hexamers with LRRC8b-e<sup>22,23</sup>. Therefore, historically, the SWELL1-LRRC8 complex was first  
89 described as a membrane protein that participated in non-ion channel mediated protein-protein  
90 signaling (non-conductive signaling) and then later found to form an ion channel complex with ion  
91 conductive signaling properties. Indeed, prior work highlights each of these modes of SWELL1-  
92 LRRC8 channel complex signaling. We showed previously SWELL1 to mediate insulin-PI3K-AKT  
93 signaling in adipocytes and skeletal muscle via non-conductive signaling mechanisms, and  
94 thereby regulates insulin-sensitivity, by modulating GRB2 signaling<sup>24-26</sup>. Also, we and others  
95 showed SWELL1-LRRC8 channel activity (conductive signaling) in the pancreatic  $\beta$ -cell is  
96 required for normal insulin secretion<sup>27,28</sup>. Thus, SWELL1-LRRC8 loss-of-function both down-  
97 regulates insulin signaling in target tissues<sup>24,29</sup> and insulin secretion from the pancreatic  $\beta$ -cell<sup>27,28</sup>  
98 inducing a state of glucose intolerance<sup>24,27,29</sup>. Since Type 2 diabetes (T2D) is characterized by  
99 both a loss of insulin sensitivity of target tissues (fat, skeletal muscle, liver) and ultimately,  
100 impaired insulin secretion from the pancreatic  $\beta$ -cell<sup>1-3</sup>, these data raised the question: could  
101 impaired SWELL1-mediated signaling contribute to T2D pathogenesis, and if so, could this be  
102 corrected pharmacologically to improve systemic glycemia?

103

104 In this study, we provide evidence that SWELL1-mediated currents and SWELL1 protein are  
105 reduced in murine and human adipocytes and pancreatic  $\beta$ -cells in the setting of T2D and

106 hyperglycemia suggesting that dysfunctional SWELL1-mediated signaling could contribute to T2D  
107 pathogenesis by impairing insulin sensitivity and insulin secretion. Next, we identify a small  
108 molecule modulator, DCPIB (renamed SN-401), as a tool compound that binds the SWELL1-  
109 LRRC8 complex<sup>30</sup>, and potentially functions as a chemical chaperone to augment SWELL1  
110 expression and plasma membrane trafficking at concentrations >90% lower than its IC<sub>50</sub> of ~5  
111  $\mu$ M for I<sub>CI,SWELL</sub><sup>31</sup>. *In vivo*, SN-401 normalizes glucose tolerance by increasing insulin sensitivity  
112 and secretion in insulin-resistant T2D mouse models, while augmenting tissue glucose uptake,  
113 suppressing hepatic glucose production, and greatly reducing hepatic steatosis and hepatocyte  
114 damage (ballooning) in obese T2D mice. Importantly, while SN-401 normalizes glycemia in  
115 diabetic mice, it has very mild glucose-lowering effects on non-obese euglycemic mice –  
116 indicating a low risk of hypoglycemic events associated with other commonly used anti-diabetic  
117 therapies, including sulfonylureas and insulin. Combining cryo-EM structure data of SN-401  
118 bound to its target SWELL1/LRRC8a<sup>30</sup> with molecular docking simulations, and novel cryo-EM  
119 structure data of an active SN-40X congener bound to SWELL1 hexameric channels in lipid  
120 nanodiscs, we validate a structure-activity relationship (SAR) based approach to generate novel  
121 SN-401 congeners with subtle molecular changes to either enhance or delete on-target activity,  
122 both *in vitro* and *in vivo*. This approach allows us to attribute the cellular and systemic SN-40X  
123 effects to drug-target binding, while controlling for off-target effects. We propose small molecule  
124 SWELL1 modulators may represent a first-in-class therapeutic approach to treat metabolic  
125 syndrome and associated diseases by restoring SWELL1 signaling across multiple organ systems  
126 that are dysfunctional in T2D.

127

128

129 **Results**

130  
131

132  **$I_{CI,SWELL}$  and SWELL1 protein are reduced in T2D  $\beta$ -cells and adipocytes**

133 SWELL1/LRRC8a ablation impairs insulin signaling in target tissues<sup>24,29</sup> and insulin secretion  
134 from the pancreatic  $\beta$ -cell<sup>27,28</sup>, inducing a pre-diabetic state of glucose intolerance<sup>24,27,29</sup>. These  
135 recent findings suggest that reductions in SWELL1 may contribute to Type 2 diabetes (T2D). To  
136 determine if SWELL1-mediated currents are altered in T2D we measured  $I_{CI,SWELL}$  in pancreatic  
137  $\beta$ -cells freshly isolated from T2D mice raised on HFD for 5-7 months (**Fig. 1a&c**) and from T2D  
138 patients (**Fig. 1b&d, Supplementary Table S1**) compared to non-T2D controls. In both mouse  
139 and human T2D  $\beta$ -cells, the maximum  $I_{CI,SWELL}$  current density (measured at +100 mV) upon  
140 stimulation with hypotonic swelling is significantly reduced (90% in murine; 63% in human, **Fig.**  
141 **1c&d**) compared to non-T2D controls, similar to reductions observed in SWELL1 knock-out  
142 (KO) and knock-down (KD) murine and human  $\beta$ -cells<sup>27</sup>, respectively. As SWELL1/LRRC8a is a  
143 critical component of  $I_{CI,SWELL}/VRAC$ <sup>21,22</sup> in both adipose tissue<sup>24,29</sup> and  $\beta$ -cells<sup>27,28</sup>, we asked  
144 whether these reductions in  $I_{CI,SWELL}$  in the setting of T2D<sup>32</sup> are associated with reductions in  
145 SWELL1 protein expression. Total SWELL1 protein in diabetic human cadaveric islets  
146 (representing numerous islet cell types) also shows a trend toward being reduced 50%  
147 compared to islets from non-diabetics (**Fig. 1e, Supplementary Table S2**), suggesting that  
148 reduced SWELL1 protein may underlie these reductions in  $I_{CI,SWELL}$  currents.

149

150 Curiously, reductions in  $\beta$ -cell  $I_{CI,SWELL}$  observed in the setting of T2D (**Fig. 1a-d**) are consistent  
151 with previous measurements of  $VRAC/I_{CI,SWELL}$  in the adipocytes of the murine KKA<sup>y</sup> T2D  
152 model<sup>32</sup>, which are reduced by 60% in T2D KKA<sup>y</sup> mice compared to KKA<sup>a</sup> controls<sup>32</sup> (**Fig. 1f**,  
153 data plotted from Inoue et al, 2010<sup>32</sup>). Similarly, SWELL1-mediated  $I_{CI,SWELL}$  measured in  
154 isolated human adipocytes from an obese T2D patient (BMI =52.3, HgbA1c = 6.9%; Fasting  
155 Glucose = 148-151 mg/dl) show a trend toward being reduced 48% compared to obese, non-

156 T2D patients that we reported previously<sup>24</sup>, and not different from  $I_{CI,SWELL}$  in adipocytes from  
157 lean patients (**Fig. 1g, Supplementary Table S3**). Consistent with reductions observed in  
158  $I_{CI,SWELL}$ , SWELL1 protein is also reduced (38%) in adipose tissue of T2D KKA<sup>y</sup> mice as  
159 compared to parental control KKA<sup>a</sup> mice (**Fig. 1h**). Similarly, SWELL1 protein is 50% lower in  
160 adipose tissue from obese T2D patients (HgbA1c > 6.0%) compared to adipose tissue from  
161 normoglycemic obese patients (HgbA1c < 6.0% **Fig. 1i, Supplementary Table S4**). Taken  
162 together, these findings suggest reduced SWELL1 activity in adipocytes and  $\beta$ -cells (and  
163 possibly other tissues) may underlie insulin-resistance and impaired insulin secretion associated  
164 with T2D. Moreover, SWELL1 protein expression increases in both adipose tissue and liver in  
165 the setting of early euglycemic obesity<sup>29</sup> and shRNA-mediated suppression of this SWELL1  
166 induction exacerbates insulin-resistance and glucose intolerance<sup>29</sup>. Therefore, we speculate that  
167 maintenance or induction of SWELL1 expression/signaling in peripheral tissues may support  
168 insulin sensitivity and secretion to preserve systemic glycemia in the setting of T2D.

169

### 170 **SWELL1 protein expression regulates insulin-stimulated PI3K-AKT2-AS160 signaling**

171 To test whether SWELL1 regulates insulin signaling, we re-expressed Flag-tagged SWELL1  
172 (SWELL1 O/E) in SWELL1 KO 3T3-F442A adipocytes and measured insulin-stimulated  
173 phosphorylated AKT2 (pAKT2) and phosphorylated AS160 (pAS160) as a readout of insulin-  
174 signaling (**Fig. 2a&b**). SWELL1 KO 3T3-F442A adipocytes exhibit significantly blunted insulin-  
175 mediated pAKT2 and pAS160 signaling compared to WT adipocytes, similar to described  
176 previously<sup>24,26</sup>, and this is fully rescued by re-expression of SWELL1 in SWELL1 KO adipocytes  
177 (KO+SWELL1 O/E, **Fig. 2a&b**)<sup>26</sup>. SWELL1 re-expression also recapitulates SWELL1-mediated  
178  $I_{CI,SWELL}$  in SWELL1 KO cells in response to hypotonic stimulation (**Fig. 2c and**  
179 **Supplementary Fig. S1a-c**), which is consistent with restoration of SWELL1-LRRC8a signaling  
180 complexes at the plasma membrane. Notably, the reductions in total AKT2 protein expression  
181 observed in SWELL1 KO adipocytes is not rescued by SWELL1 re-expression, indicating that

182 transient changes in SWELL1 protein expression in adipocytes regulates pAKT2 signaling, as  
183 opposed to total AKT2 protein expression. We confirmed FLAG-tagged SWELL1 traffics  
184 normally to the plasma membrane when expressed in both WT and SWELL1 KO adipocytes  
185 visualized by immunofluorescence (IF) using anti-FLAG and SWELL1 KO-validated anti-  
186 SWELL1 antibodies, respectively (**Supplementary Fig. S1d&e**). FLAG-tagged SWELL1  
187 overexpressed in WT and SWELL1 KO adipocytes assumes a punctate pattern at the cell  
188 periphery, similar to endogenous SWELL1 in WT adipocytes. Overall, these data indicate that  
189 SWELL1 expression levels regulate insulin-PI3K-AKT2-AS160 signaling in adipocytes -  
190 potentially by modulating GRB2 signaling<sup>20,24-26</sup>. Furthermore, these data imply that  
191 pharmacological SWELL1 induction in peripheral tissues in the setting of T2D may enhance  
192 insulin signaling and improve systemic insulin-sensitivity and glycemic control.

193

194 **A small molecule binds SWELL1-LRRC8 channel complexes, increases adipocyte**  
195 **SWELL1 protein expression and SWELL1-dependent insulin signaling**

196 The small molecule 4-[(2-Butyl-6,7-dichloro-2-cyclopentyl-2,3-dihydro-1-oxo-1*H*-inden-5-  
197 yl)oxy]butanoic acid (*DCPIB*, **Fig. 2d**) is among a series of structurally diverse  
198 (acylaryloxy)acetic acid derivatives, that were synthesized and studied for diuretic properties in  
199 the late 1970s<sup>33,34</sup> and evaluated in the 1980s as potential treatments for brain edema<sup>35,36</sup>.

200 While *DCPIB* was derived from the FDA-approved diuretic ethacrynic acid, it has minimal  
201 diuretic activity<sup>37</sup>, and has instead been used as a selective VRAC/*I<sub>Cl,SWELL</sub>* inhibitor<sup>24,27,31</sup> (**Fig.**  
202 **2e**), binding at a constriction point within the SWELL1-LRRC8 hexamer<sup>30,38-40</sup>. Having  
203 demonstrated that SWELL1 regulates insulin-AKT2 signaling in multiple cell types, including  
204 adipocytes<sup>24,25,29</sup>, skeletal muscle<sup>26</sup>, and endothelium<sup>41</sup>, we anticipated pharmacological  
205 inhibition of VRAC/*I<sub>Cl,SWELL</sub>* with *DCPIB*, which we here re-name SN-401, would decrease insulin  
206 signaling. Unexpectedly, SN-401 increased SWELL1 protein expression in 3T3-F442A  
207 preadipocytes (3-fold control expression; **Fig. 2f&g**) and adipocytes (1.5-fold control expression;

208 **Fig. 2h**) when applied for 96 hours, and was associated with enhanced insulin-stimulated levels  
209 of pAKT2 (**Fig. 2f-g&i-j**), and insulin-stimulated levels of pAS160 (**Fig. 2i&j**). These SN-401-  
210 mediated effects on insulin-AKT2-AS160 signaling are absent in SWELL1 KO 3T3-F442A  
211 adipocytes, consistent with an on-target SWELL1-mediated mechanism of action for SN-401  
212 (**Fig. 2i&j**). The SN-401-mediated increases in SWELL1 protein expression are not associated  
213 with increases in SWELL1 mRNA, nor in the mRNA for other LRRC8 subunits: LRRC8b,  
214 LRRC8c, LRRC8d or LRRC8e that form the SWELL1 channel complex (**Supplementary Fig.**  
215 **S2a-c**), implicating post-transcriptional mechanisms for increased SWELL1 expression and  
216 SWELL1-LRRC8 associated signaling.

217

### 218 **SN-401 increases SWELL1 and improves systemic glucose homeostasis in murine T2D** 219 **models by enhancing insulin sensitivity and secretion**

220 To determine if SN-401 improves insulin signaling and glucose homeostasis *in vivo* we treated  
221 two T2D mouse models: obese, HFD-fed mice and the polygenic T2D KKA<sup>y</sup> mouse model with  
222 SN-401 (5 mg/kg i.p. for 4-10 days). *In vivo*, SN-401 augments SWELL1 expression 2.3-fold in  
223 adipose tissue of HFD-fed T2D mice (**Fig. 3a**). Similarly, SN-401 increases SWELL1 expression  
224 in adipose tissue of T2D KKA<sup>y</sup> mice to levels comparable to both non-T2D C57/B6 mice and to  
225 the parental KKA<sup>a</sup> parental strain (**Fig. 3b**). This restoration of SWELL1 expression is  
226 associated with normalized fasting blood glucose (FG), glucose tolerance (GTT), and markedly  
227 improved insulin-tolerance (ITT) in both HFD-induced T2D mice (**Fig. 3c**) and in the polygenic  
228 T2D KKA<sup>y</sup> model (**Fig. 3d-f**), without significant reductions in body weight (**Supplementary**  
229 **Table S5**). Remarkably, treating the control KKA<sup>a</sup> parental strain with SN-401 at the same  
230 treatment dose (5 mg/kg x 4-10 days) does not cause hypoglycemia, nor does it alter glucose  
231 and insulin tolerance (**Fig. 3d-f**). Similarly, lean, non-T2D, glucose-tolerant mice treated with  
232 SN-401 have similar FG, GTT and ITT compared to vehicle-treated mice (**Fig. 3g&h and**  
233 **Supplementary Fig. S3a-c**). However, when made insulin-resistant and diabetic after 16 weeks



234 of HFD feeding, these same mice (from **Fig. 3g&h**) treated with SN-401 show marked  
235 improvements in FG (**Fig. 3i**), GTT and ITT (**Fig. 3j**) as compared to vehicle. These data show  
236 that SN-401 restores glucose homeostasis in the setting of T2D, but has little effect on glucose  
237 homeostasis in non-T2D mice. Importantly, this portends a low risk for inducing hypoglycemia.  
238 SN-401 was well-tolerated during chronic i.p. injection protocols, with no overt signs of toxicity  
239 with daily i.p. injections for up to 8 weeks, despite striking effects on glucose tolerance  
240 (**Supplementary Fig. S3d**).

241  
242 To examine the possible contribution of SN-401-mediated enhancements in insulin secretion  
243 from pancreatic  $\beta$ -cells, we next measured glucose-stimulated insulin secretion (GSIS) in SN-  
244 401 treated mice subjected to 21 weeks of HFD. We found that the impairments in GSIS  
245 commonly observed with long-term HFD (21 weeks HFD) are significantly improved in SN-401-  
246 treated HFD mice based on serum insulin measurements (**Fig. 3k**) and perfusion GSIS from  
247 isolated islets (**Fig. 3l**), consistent with the predicted effect of SWELL1 induction in pancreatic  $\beta$ -  
248 cells<sup>27,28</sup>. Similar results are obtained in perfusion assays performed in SN-401 compared to  
249 vehicle treated T2D KKA<sup>y</sup> mice (**Fig. 3m**). Collectively, these data suggest that SN-401-  
250 mediated improvements in systemic glycemia in T2D occur via augmentation of both peripheral  
251 insulin sensitivity and  $\beta$ -cell insulin secretion – the inverse phenotype to *in vivo* loss-of-function  
252 studies<sup>24,27-29</sup>.

253  
254 **SN-401 improves systemic insulin sensitivity, tissue glucose uptake, and nonalcoholic**  
255 **fatty liver disease in murine T2D models.**

256 To more rigorously evaluate SN-401 effects on insulin sensitization and glucose metabolism in  
257 T2D mice we performed euglycemic hyperinsulinemic clamps traced with <sup>3</sup>H-glucose and <sup>14</sup>C-  
258 deoxyglucose in T2D KKA<sup>y</sup> mice treated with SN-401 or vehicle. SN-401 treated T2D KKA<sup>y</sup> mice  
259 require a higher glucose-infusion rate (GIR) to maintain euglycemia compared to vehicle,



260 consistent with enhanced systemic insulin-sensitivity (**Fig. 4a**). The rate of glucose appearance  
261 ( $R_a$ ), which reflects hepatic glucose production from gluconeogenesis and/or glycogenolysis,  
262 was reduced 40% in SN-401-treated T2D KKA<sup>y</sup> mice at baseline (Basal, **Fig. 4b**), and further  
263 suppressed 75% during glucose/insulin infusion (Clamp, **Fig. 4b**), revealing SN-401 increases  
264 hepatic insulin sensitivity – similar to thiazolidinediones (TZD)<sup>42</sup>.

265 As the SN-401-mediated increase in SWELL1 is expected to enhance insulin-pAKT2-pAS160  
266 signaling, GLUT4 plasma membrane translocation, and tissue glucose uptake<sup>24</sup>, we next  
267 measured the effect of SN-401 on glucose uptake in adipose, myocardium and skeletal muscle  
268 using 2-deoxyglucose (2-DG). SN-401 enhanced insulin-stimulated 2-DG uptake into inguinal  
269 white adipose tissue (iWAT), gonadal white adipose tissue (gWAT), and myocardium (**Fig. 4c**).  
270 As SWELL1 ablation markedly reduces insulin-pAKT2-pGSK3 $\beta$  signaling<sup>24,26,41</sup> and cellular  
271 glycogen content<sup>24</sup>, we asked whether the SN-401-mediated increase in SWELL1 would  
272 increase glucose incorporation into tissue glycogen in the setting of T2D. Indeed, liver, adipose,  
273 and skeletal muscle glucose incorporation into glycogen is markedly increased in SN-401-  
274 treated mice (**Fig. 4d**), consistent with a SWELL1-mediated insulin-pAKT2-pGSK3 $\beta$ -glycogen  
275 synthase gain-of-function.

276  
277 Nonalcoholic fatty liver disease (NAFLD), like T2D, is associated with insulin resistance<sup>43</sup>.  
278 NASH is an advanced form of nonalcoholic liver disease defined by three histological features:  
279 hepatic steatosis, hepatic lobular inflammation, hepatocyte damage (ballooning) and can be  
280 present with or without fibrosis. NAFLD and T2D likely share at least some pathophysiologic  
281 mechanisms because more than one-third of patients (37%) with T2D have NASH<sup>44</sup> and almost  
282 one-half of patients with NASH (44%) have T2D<sup>45</sup>. To evaluate the effect of SN-401 on the  
283 genesis of NAFLD, mice were raised on HFD for 16 weeks followed by intermittent dosing with  
284 SN-401 over the course of 5 weeks (**Fig. 4e**). These mice had grossly smaller livers (**Fig. 4f**),  
285 lower hepatic triglyceride concentrations (**Fig. 4g**) and experienced a mild 14% reduction in

286 body weight compared to vehicle-treated mice (**Fig. 4f**). Histologic evaluation revealed  
287 significant reductions in hepatic steatosis and hepatocyte damage compared to vehicle-treated  
288 mice (**Fig. 4h&i, Supplemental Fig. S4**). The NAFLD activity score (NAS), which integrates  
289 histologic scoring of hepatic steatosis, lobular inflammation, and hepatocyte ballooning<sup>46</sup> (**Fig.**  
290 **4i**), also improved >2 points in SN-401-treated mice compared to vehicle-treated mice. These  
291 SN-401 mediated reductions in hepatic steatosis and hepatocyte damage are consistent with  
292 the observed increases in hepatic insulin sensitivity and consequent reductions in hepatic  
293 glucose production via gluconeogenesis available for hepatic *de novo* lipogenesis, as observed  
294 with other insulin sensitizers, such as metformin and TZDs<sup>47</sup>. Taken together, these data reveal  
295 that SN-401 augments SWELL1 protein and SWELL1-mediated signaling to concomitantly  
296 enhance both systemic insulin sensitivity and pancreatic  $\beta$ -cell insulin secretion, thereby  
297 normalizing glycemic control in T2D mouse models. This improved metabolic state can reduce  
298 ectopic lipid deposition, hepatocyte damage, and NAFLD that is associated with obesity and  
299 T2D.

300

### 301 **Chemical synthesis, molecular docking and cryo-EM reveal specific SN-401-SWELL1** 302 **interactions required for on-target activity**

303 To confirm that SN-401-induced increases in SWELL1 protein and signaling are mediated by  
304 direct binding to the SWELL1-LRRC8 channel complex, as opposed to off-target effects, we  
305 designed and synthesized novel SN-401 congeners (**Fig. 5a**) with subtle structural changes that  
306 either enhanced (SN-403, SN-406, SN-407), or entirely eliminated (Inactive1, Inactive2) SN-401  
307 inhibition of  $I_{Cl,SWELL}$  (**Fig. 5b&c; Supplementary Fig. S5a-c**). The cryo-EM structure of SN-  
308 401/DCPIB bound within the SWELL1 homo-hexamer revealed that SN-401 binds at a  
309 constriction point in the pore wherein the electronegative SN-401 carboxylate group interacts  
310 electrostatically with the R103 residue in one or more of the SWELL1 monomers<sup>30</sup>. Moreover,  
311 SN-401 appeared to stabilize the pore region of the SWELL1 hexamer in lipid-nanodiscs<sup>30</sup>. To

312 characterize the structural features of SN-401 responsible for binding to SWELL1-LRRC8, we  
313 performed molecular docking simulations of SN-401 and its analogs into the SWELL1 homo-  
314 hexamer (PDB: 6NZZ), and identified two molecular determinants predicted to be critical for SN-  
315 401-SWELL1-LRRC8 binding (**Fig. 5d**): (1) the length of the carbon chain leading to the anionic  
316 carboxylate group predicted to electrostatically interact with one or more R103 guanidine groups  
317 (found in SWELL1/LRRC8a and LRRC8b; **Fig. 5d-solid circles**); and (2) proper orientation of  
318 the hydrophobic cyclopentyl group that slides into a hydrophobic cleft at the interface of LRRC8  
319 monomers (conserved among all LRRC8 subunit interfaces; **Fig. 5d-broken circles**). Docking  
320 simulations predicted shortening the carbon chain leading to the carboxylate by 2 carbons  
321 would yield a molecule, Inactive 1, that could *either* interact with R103 through the carboxylate  
322 group (**Supplementary Fig. S5d(i)**), *or* have the cyclopentyl ring occupy the hydrophobic cleft  
323 (**Supplementary Fig. S5d(ii)**), but unable to simultaneously participate in both interactions  
324 (**Supplementary Fig. S5d**). Similarly, docking simulations predicted removing the butyl group of of  
325 SN-401 would yield a molecule, Inactive 2, unable to orient the cyclopentyl group into a position  
326 favorable for interaction with the hydrophobic cleft without introducing structural strain in the  
327 molecule (**Supplementary Fig. S5e, black arrow**). Both of these structural modifications,  
328 predicted to abrogate either carboxylate-R103 electrostatic binding (Inactive 1) *or* cyclopentyl-  
329 hydrophobic pocket binding (Inactive 2) were sufficient to eliminate  $I_{CI,SWELL}$  inhibitory activity *in*  
330 *vitro* (**Fig. 5b&c**). Conversely, lengthening the carbon chain attached to the carboxylate group of  
331 SN-401 by 1-3 carbons (SN-403; 1 carbon, SN-406: 2 carbons, and SN407: 3 carbons) was  
332 predicted to enhance the R103 electrostatic interactions (**Fig. 5e; Supplementary Fig. S5f&g,**  
333 **black solid circle**), and better orient the cyclopentyl group to bind within the hydrophobic cleft  
334 (**Fig. 5e, Supplementary Fig. S5f&g, broken circle**). Additional binding interactions for SN-  
335 403, SN-406 and SN-407 are also predicted along the channel, due to the longer carbon chains  
336 affording additional hydrophobic interactions with side chain carbons of the R103 residues (**Fig.**  
337 **5e; Supplementary Fig. S5f&g, purple dashes**). As anticipated, SN-403, SN-406, and SN-407

338 had increased  $I_{Cl,SWELL}$  inhibitory activity as compared to SN-401 (**Fig. 5b&c; Supplementary**  
339 **Fig. S5a-c**).

340

341 To test the predictions of our molecular docking simulations, we used cryo-EM to determine the  
342 structure of the SWELL1 homohexamer in lipid nanodiscs in the presence of SN-407 (**Fig. 5f,**  
343 **Supplementary Figs. S6-8**). In initial maps using six-fold symmetry, SN-407 density was less  
344 apparent than for DCPIB/SN-401<sup>30</sup>, potentially due to a reduction in SN-407 occupancy that is a  
345 consequence of lower compound solubility or the presence of multiple drug poses in different  
346 particles (**Supplementary Fig. S7**). Therefore, we utilized six-fold symmetry expansion and  
347 symmetry relaxation<sup>48</sup> and were able to resolve two distinct poses for SN-407 with similar  
348 occupancy. Pose-1 shows the drug oriented vertically in the channel's selectivity filter in a  
349 manner that is similar to that observed for DCPIB/SN-401, but with the lengthened carboxylate  
350 chain coiling to maintain its interaction with R103 (**Fig. 5f(i)**). In Pose-2, SN-407 is tilted off the  
351 SWELL1 central axis, positioning its cyclopentyl group closer to the hydrophobic cleft between  
352 SWELL1 subunits (**Fig. 5f(ii)**). These data confirm lengthening the carboxylate chain in SN-407  
353 preserves electrostatic interactions with R103 and enables additional contacts between the  
354 carboxylate chain and upper hydrophobic moieties in distinct binding poses, consistent with the  
355 results of our docking simulations. Collectively, these molecular docking, cryo-EM and functional  
356 experiments indicate that SN-401 and SWELL1-active congeners (SN-403/406/407) bind to  
357 SWELL1-LRRC8 hexamers at both R103 (via carboxylate end) and at the interface between  
358 adjacent LRRC8 monomers (via hydrophobic end), to potentially stabilize the closed state of the  
359 channel, and thereby inhibit  $I_{Cl,SWELL}$  activity. Indeed, SN-401/SN-407 cryo-EM data, and  
360 molecular docking simulations likely reflects the closed state of the SWELL1 homomer. This  
361 raises the possibility that SN-401 and active SN-40X compounds bind with higher affinity to  
362 SWELL1-LRRC8 complexes in the closed state most commonly encountered under native,  
363 physiological conditions, as compared to the open state. Moreover, we hypothesize these SN-

364 40X compounds may function as molecular tethers to stabilize assembly of the SWELL1-  
365 LRRC8 hexamer by binding between R103 and adjacent LRRC8 monomers, potentially  
366 reducing SWELL1-LRRC8 complex disassembly, subsequent proteasomal degradation, and  
367 thereby augment translocation from ER to plasma membrane signaling domains, akin to  
368 pharmacological chaperones<sup>49, 50,51, 52,53</sup>

369

370 **SN-401 and SWELL1-active congener SN-406 inhibit  $I_{CI,SWELL}$  and promote SWELL1**  
371 **dependent signaling at sub-micromolar concentrations**

372 To test this hypothesis, we compared the potency of SN-401/SN-406 to block  $I_{CI,SWELL}$  when  
373 applied to closed as compared to open SWELL1-LRRC8 channels. SN-401/SN-406  
374 concentrations of 7-10  $\mu$ M are required to effectively block channels when first opened by  
375 hypotonic activation (**Fig. 5b&c**)<sup>31</sup>. In contrast, application of 1  $\mu$ M of SN-401 or SN-406 to  
376 SWELL1-LRRC8 channels in the closed state (i.e. for 30 min *prior* to hypotonic activation)  
377 markedly suppressed and delayed subsequent hypotonic activation of  $I_{CI,SWELL}$ , compared to  
378 either vehicle alone, or inactive compounds (**Fig. 6a&b**). SN-401 and SN-406 at concentrations  
379 as low as 250 nM had a similar effect (**Fig. 6c&d**). These data support the notion that SN-40X  
380 compounds bind with higher affinity to SWELL1-LRRC8 channels in the closed/resting state  
381 than the open/activated state, and stabilize the closed conformation at less than one-tenth the  
382 concentration required to inhibit activated SWELL1-LRRC8 channels.

383

384 Next, we applied SWELL1-active (SN-401, SN-406), and inactive (Inactive1, Inactive 2)  
385 compounds to differentiated 3T3-F442A adipocytes under basal culture conditions for 4 days  
386 and then measured SWELL1 protein after 6 h of serum starving. At both 10 and 1  $\mu$ M, SN-401  
387 and SN-406 markedly augment SWELL1 protein to levels 1.5-2.1-fold greater than vehicle-  
388 treated controls, while SWELL1-inactive congeners Inactive 1 and Inactive 2 do not significantly

389 increase SWELL1 protein levels (**Fig. 6e-h**). SN-401 and SN-406 also enhanced plasma  
390 membrane (PM) localization of endogenous SWELL1 in preadipocytes compared to vehicle- or  
391 Inactive1 (**Fig. 6i&j; Supplementary Fig. S9a**), consistent with increased endoplasmic  
392 reticulum (ER) to plasma membrane trafficking of SWELL1. Notably, SN-401 and SN-406 are  
393 capable of augmenting both SWELL1 protein and trafficking at concentrations as low as 1  $\mu$ M  
394 (**Fig. 6g-j; Supplementary Fig. S9a**), or an order of magnitude below the  $\sim$ 10  $\mu$ M concentration  
395 required for inhibiting activated SWELL1-LRRC8 (upon hypotonic stimulation). These findings  
396 are consistent with the results of SN-401/SN-406  $I_{CI,SWELL1}$  inhibition when pre-applied to closed  
397 SWELL1-LRRC8 channels (**Fig. 6a-d**) and also with our observations that 500 nM SN-401 is  
398 sufficient to augment SWELL1 dependent insulin-AKT2-AS160 signaling in 3T3-F442A  
399 adipocytes (**Fig. 2i&j**). Similarly, SN-401 applied at 500 nM to human umbilical vein endothelial  
400 cells (HUVECs) increases eNOS phosphorylation, a downstream AKT target, and this effect is  
401 abrogated by small interfering/short hairpin mediated *SWELL1* knockdown in HUVECs,  
402 supporting a SWELL1 dependent mechanism (**Supplementary Fig. S9b-d**). Furthermore, SN-  
403 406 applied to HUVECs at 100 nM is sufficient to induce SWELL1 1.5-fold, basal pAKT2 2.8-  
404 fold, and downstream p-eNOS 5.5-fold as compared to vehicle (**Fig. 6k&l**), while Inactive 1 has  
405 no effect at 500 nM (**Fig. 6m&n**). Indeed, SN-401 exhibits dose-dependent induction p-eNOS in  
406 HUVECs with an  $EC_{50}$  of 21 nM (**Fig. 6o&p**).

407

#### 408 **SWELL1-active compounds prevent reductions in SWELL1 protein and rescue SWELL1** 409 **dependent islet insulin secretion under glucolipotoxic conditions**

410 We next asked whether endoplasmic reticulum (ER) stress associated with glucolipotoxicity in  
411 metabolic syndrome may promote SWELL1 protein degradation, and thereby reduce  $I_{CI,SWELL1}$   
412 and SWELL1 protein in T2D (**Fig. 1**). In this context, we hypothesized that SN-401 and SN-406  
413 might assist with SWELL1-LRRC8 assembly and rescue SWELL1-LRRC8 from degradation. To

414 test this concept *in vitro*, we first treated 3T3-F442A adipocytes with either vehicle, SN-401, SN-  
415 406 or Inactive 2, and then subjected these cells to 1 mM palmitate + 25 mM glucose to induce  
416 to glucolipotoxic stress (Fig. 7a&b). We found that SWELL1 protein was reduced by 50% upon  
417 palmitate/glucose treatment, consistent with ER stress-mediated SWELL1 degradation, and this  
418 reduction was entirely prevented by both SWELL1-active SN-401 and SN-406, but not by  
419 SWELL1-inactive 2 (Fig. 7a&b). These data are consistent with the notion that SN-401 and  
420 SWELL1-active congeners are functioning to stabilize SWELL1-LRRC8 assembly and signaling  
421 under glucolipotoxic conditions associated with T2D and metabolic syndrome.

422

423 To examine whether these protective effects of SN-401 under glucolipotoxic conditions is also  
424 capable of rescuing islet insulin secretion, and whether this effect occurs via target engagement,  
425 we measured dynamic glucose-stimulated insulin secretion (GSIS) by perfusion in human and  
426 murine islets +/- palmitate +/- SN-401 and +/- SWELL1 as outlined in Fig. 7c. In both human  
427 and murine islets, we found that 16 hours of 1mM palmitate treatment reduces GSIS compared  
428 to baseline (Fig. 7d-g, Supplementary Table. S2). However, when islets are treated with SN-  
429 401 (10  $\mu$ M) for 4 days prior to palmitate treatment, then maintained during palmitate treatment,  
430 and subsequently SN-401/palmitate washed off during GSIS, insulin secretion is normalized  
431 (Fig. 7d-g, Supplementary Table. S2). Importantly, this SN-401 mediated GSIS normalization  
432 under glucolipotoxic conditions is SWELL1 dependent, since this rescue is completely  
433 abrogated in SWELL1 KD human islets (Fig. 7d&e, Supplementary Table. S2) and  $\beta$ -cell  
434 targeted SWELL1 KO murine islets (Fig. 7f&g).

435

#### 436 **SWELL1-active SN-401 congeners improve glycemic control in murine T2D**

437 To determine if the effects of SN-401 observed *in vivo* in T2D mice are attributable to SWELL1-  
438 LRRC8 binding, as opposed to off-target effects, we next measured fasting blood glucose and  
439 glucose tolerance in HFD T2D mice treated with either SWELL1-active SN-403 or SN-406 as



440 compared to SWELL1-inactive Inactive 1 (all at 5 mg/kg/day x 4 days). In mice treated with HFD  
441 for 8 weeks, SN-403 significantly reduced fasting blood glucose and improved glucose tolerance  
442 compared to Inactive 1 (**Fig. 8a**). In cohorts of mice raised on HFD for 12-18 weeks, with more  
443 severe obesity-induced T2D, SN-406 also markedly reduced fasting blood glucose and  
444 improved glucose tolerance (**Fig. 8b**). Similarly, in a separate experiment, SN-406 significantly  
445 improved glucose tolerance in HFD T2D mice, compared to Inactive 1 (**Fig. 8c**), and this is  
446 associated with a trend toward improved insulin sensitivity based on the Homeostatic Model  
447 Assessment of Insulin Resistance (HOMA-IR)<sup>54</sup> (**Fig. 8d**), and significantly augmented insulin  
448 secretion in perfusion GSIS (**Fig. 8e**). Finally, based on the GTT AUC, SN-407 also improved  
449 glucose tolerance in T2D KKA<sup>y</sup> mice, compared to Inactive 1 (**Fig. 8f**) and increased GSIS (**Fig.**  
450 **8g**). These data reveal the *in vivo* anti-hyperglycemic action of SN-401 and its bioactive  
451 congeners require SWELL1-LRRC8 binding and thus supports the notion of SWELL1 on-target  
452 activity *in vivo*.

453

454 An important feature of the hypothesized mechanism of action of SN-40X is that these active  
455 compounds bind to SWELL1-LRRC8 channel complexes *in vivo* in the ~100-500 nM range to  
456 augment SWELL1-dependent signaling (**Fig 2i&j; Fig. 6k-p; Supplementary Fig. S9b-d**)  
457 without achieving the serum concentrations necessary for open channel SWELL1 current  
458 inhibition (~5-10  $\mu\text{M}$ )<sup>31</sup>, followed by unbinding. As such, SWELL1 function may be rescued  
459 without significant SWELL1-LRRC8 or VRAC inhibition. Consistent with this hypothesis, *in vivo*  
460 pharmacokinetics (PK) of SN-401 and SN-406 in mice following i.p. or p.o. administration of 5  
461 mg/kg of SN-401 or SN-406 reveal plasma concentrations that either transiently approach  
462 (**Supplementary Fig. S10a**, i.p. dosing), or remain well below  $I_{CI,SWELL}$  inhibitory concentrations  
463 (**Supplementary Fig. S10b**, p.o. dosing) while exceeding concentrations sufficient for induction  
464 of SWELL1 signaling activity (> ~100 nM) for 8-12 hours. Importantly, SN-401 PK in a target  
465 tissue, adipose, also closely tracks serum concentrations via both i.p. and p.o. administration



466 **(Supplementary Fig. S10c)**. Finally, these *in vivo* PK studies demonstrate that SN-401 has  
467 high oral bioavailability ( $AUC_{p.o.}/AUC_{i.v.} = 79\%$ , **Supplementary Table S7**), and when  
468 administered via oral gavage to HFD-fed T2D C57 mice at 5 mg/kg/day SN-401 fully retains *in*  
469 *vivo* therapeutic efficacy (**Supplementary Fig. S10d**). Collectively, these PK data reveal that  
470 appropriate SN-401 concentrations are attained to achieve the observed therapeutic effect,  
471 while remaining insufficient to inhibit activated VRAC.  
472

## 473 Discussion

474 Our current working model is that the transition from compensated obesity (pre-diabetes,  
475 normoglycemia) to decompensated obesity (T2D, hyperglycemia) reflects, among other things,  
476 a relative reduction in SWELL1 protein expression and signaling in peripheral insulin-sensitive  
477 tissues<sup>29,32</sup> and in pancreatic  $\beta$ -cells<sup>55,56</sup> – metabolically phenocopying SWELL1-loss-of-function  
478 models<sup>24,27-29</sup>. This contributes to the combined insulin resistance and impaired insulin-secretion  
479 associated with poorly-controlled T2D and hyperglycemia. SWELL1 forms a macromolecular  
480 signaling complex that includes heterohexamers of SWELL1 and LRRC8b-e<sup>22,23</sup>, with  
481 stoichiometries that likely vary from tissue to tissue. We propose SWELL1-LRRC8 signaling  
482 complexes are inherently unstable, and thus a proportion of complexes succumb to disassembly  
483 and degradation. Glucolipotoxicity and ensuing ER stress associated with T2D states<sup>57-59</sup>  
484 provide an unfavorable environment for SWELL1-LRRC8 complex assembly, contributing to  
485 SWELL1 degradation and reductions in SWELL1 protein and SWELL1-mediated  $I_{Cl,SWELL}$   
486 observed in T2D. We speculate that small molecules SN-401 and active congeners (SN-40X)  
487 serve as pharmacological chaperones<sup>49</sup> to stabilize formation of the SWELL1-LRRC8 complex.  
488 This reduces SWELL1 degradation, and enhances the passage of SWELL1-LRRC8 heteromers  
489 through the ER and Golgi apparatus to the plasma membrane – thereby rectifying the SWELL1-  
490 deficient state in multiple metabolically important tissues in the setting of metabolic syndrome to  
491 improve glycemic control via both insulin sensitization<sup>24,25,29</sup> and secretion<sup>27,28</sup> mechanisms.  
492 Indeed, the concept of small molecule inhibitors acting as therapeutic molecular chaperones<sup>49</sup> to  
493 support the folding, assembly and trafficking of proteins (including ion channels) has been  
494 demonstrated for Niemann-Pick C disease<sup>50,51</sup> and congenital hyperinsulinism (SUR1-K<sub>ATP</sub>  
495 channel mutants)<sup>60-62</sup>. Similarly, in the case of congenital hyperinsulinism, the SUR1-K<sub>ATP</sub>  
496 chemical chaperones are also themselves, paradoxically, K<sub>ATP</sub> channel inhibitors<sup>60-62</sup>. Also, this  
497 therapeutic mechanism is analogous to small molecule correctors for another chloride channel,  
498 CFTR (VX-659/VX-445, Vertex Pharmaceuticals)<sup>52,53</sup>, which is proving to be a breakthrough

499 therapeutic approach<sup>63,64</sup> for cystic fibrosis. *In vivo*, we hypothesize SN-40X compounds bind to  
500 SWELL1-LRRC8 complexes in the closed state, within the concentration range between  $C_{max}$   
501 and ~100 nM. This shifts the balance toward maintaining stable SWELL1-LRRC8 complexes to  
502 preserve normal levels and localization (trafficking) within the T2D glucolipotoxic milieu. SN-40X  
503 may then unbind from the SWELL1-LRRC8 complex, thereby restoring insulin signaling in target  
504 tissues, and permitting SWELL1-mediated  $\beta$ -cell insulin secretion. This seemingly paradoxical  
505 mechanism may rely on the *phasic* SN-40X concentrations observed *in vivo* (see *in vivo* PK  
506 data) to allow for SN-401 binding, resultant chaperone-mediated rescue, followed by unbinding;  
507 as opposed to *tonic* SN-40X-SWELL1 binding. Another prediction of this model is that lower-  
508 affinity SN-40X compounds may be preferable to very high-affinity congeners, to provide the  
509 appropriate pharmacodynamics required for unbinding, and optimal therapeutic efficacy. Indeed,  
510 this mechanism is reminiscent of the paradoxical use of insulin secretagogue sulfonylurea  
511 receptor inhibitors as pharmacological chaperones to rescue KATP mutants in congenital  
512 hyperinsulinism by binding (and inhibiting) these mutant KATP channels<sup>60-62</sup>, and then  
513 unbinding, thereby favoring lower affinity inhibitors: tolbutamide and carbamazepine, over  
514 glibenclamide.

515

516 Through structure activity relationship (SAR), *in silico* molecular docking studies and cryo-EM  
517 studies, we identified hotspots on opposing ends of the SN-401 molecule that interact with  
518 separate regions of the SWELL1-LRRC8 complex: the carboxylate group with R103 in multiple  
519 LRRC8 subunits at a constriction in the pore, and the cyclopentyl group within the hydrophobic  
520 cleft formed by adjacent LRRC8 monomers; functioning like a molecular staple or tether to bind  
521 loosely associated SWELL1-LRRC8 monomers (especially in the setting of T2D) into a more  
522 stable hexameric structure. Indeed, the cryo-EM structure obtained in lipid nanodiscs of SN-  
523 401<sup>30</sup> and novel derivative SN-407 supports hypothesized binding models of SN-40X with  
524 SWELL1 homomer.

525 Another advantage provided by SAR studies was identification and synthesis of SN-401  
526 congeners that removed (Inactive 1 and 2) or enhanced (SN-403/406/407) SWELL1-binding, as  
527 these provided powerful tools to query SWELL1-on target activity directly *in vitro* and *in vivo*,  
528 and also validated the proof-of-concept for developing novel SN-401 congeners with enhanced  
529 efficacy. Indeed, this approach was necessary to prove SWELL1-LRRC8 on-target activity of  
530 the SN-40X series *in vivo*, because SWELL1-LRRC8 is expressed broadly in numerous insulin-  
531 sensitive tissues and in islet cells. As the global SWELL1/LRRC8a KO mouse is essentially  
532 embryonically lethal<sup>20</sup> testing SN-40X compounds in global SWELL1<sup>-/-</sup> mice is not possible, and  
533 generating multi-tissue (adipose, liver, skeletal muscle,  $\beta$ -cell) SWELL1 KO mice is outside the  
534 scope of the current study. Therefore, using the SAR to generate SWELL1-LRRC8 inactive  
535 compounds (Inactive 1 and 2) as a negative control provided an alternative approach to prove *in*  
536 *vivo* on-target activity on a broadly expressed signaling molecule. In addition to this medicinal  
537 chemistry approach employed both *in vitro* and *in vivo* to test on target activity, we found that  
538 SN-40X mediated induction of AKT-AS160 and AKT-eNOS signaling requires SWELL1 in  
539 cultured adipocytes and HUVECs, respectively. Moreover, SN-401 mediated rescue of islet  
540 insulin secretion under gluco-lipotoxic conditions *in vitro* also requires SWELL1. Finally, it is  
541 important to note that the studies demonstrating promiscuity of SN-401/DCPIB with other ion  
542 channel targets all applied DCPIB at  $\sim 10$ -200  $\mu\text{M}$ <sup>65-70</sup>. This is 100-200-fold higher than the  
543 concentrations required to potentiate SWELL1-dependent signaling *in vitro* (**Fig. 2i&j; Fig. 6k-p;**  
544 **Supplementary Fig. S9b-d**), and similarly higher than SN-401 and SN-406 concentrations  
545 predominantly attained *in vivo* (**Supplementary Fig. S10a-c**) to achieve a therapeutic effect  
546 (**Fig. 3&8**). Accordingly, these studies are not applicable with respect to putative off-target  
547 mechanisms for the therapeutic effects observed from SN-40X compounds.  
548  
549 SWELL1-LRRC8 complexes are broadly expressed in multiple tissues, and consist of unknown  
550 combinations of SWELL1, LRRC8b, LRRC8c, LRRC8d and LRRC8e, indicating SWELL1

551 complexes may be enormously heterogenous. However, SWELL1-LRRC8 stabilizers like SN-  
552 401 may be designed to target many, if not all, possible channel complexes since all will contain  
553 the elements necessary for SN-401 binding: at least one R103 (from the requisite SWELL1  
554 monomer: carboxyl group binding site), and the nature of the hydrophobic cleft (cyclopentyl  
555 binding site), which is conserved among all LRRC8 monomers. Indeed, traced glucose clamps  
556 did reveal insulin sensitization effects in multiple tissues, including adipose, skeletal muscle,  
557 liver and heart. The increased glucose-uptake in heart is particularly interesting, since this may  
558 provide salutary effects on cardiac energetics that could favorably impact both systolic (HF<sub>r</sub>EF)  
559 and diastolic (HF<sub>p</sub>EF) function in diabetic cardiomyopathy, and thereby potentially improve  
560 cardiac outcomes in T2D, as observed with SGLT2 inhibitors<sup>71-76</sup>.

561

562 The current study provides an initial proof-of-concept for pharmacological induction of SWELL1  
563 signaling using SWELL1 modulators (SN-40X) to treat metabolic diseases at multiple  
564 homeostatic nodes, including adipose, skeletal muscle, liver, and pancreatic  $\beta$ -cell, whereby  
565 SN-40X compounds function to restore both insulin-sensitivity and insulin secretion. Hence, SN-  
566 401 may represent a tool compound from which a novel drug class may be derived to treat T2D,  
567 NASH, and other metabolic diseases.

568

569

570

571

572 **Methods**

573

574

575 **Patients**

576 Human islets (Integrated Islet Distribution Program, Prodo Laboratories and Alberta Diabetes  
577 Institute Islet Core) and adipocytes were obtained and cultured as described previously<sup>24,27</sup>. The  
578 patients involved in the study were anonymous and information such as gender, age, HbA1c,  
579 glucose levels and BMI only were available to the research team. The study was approved and  
580 carried out as per the guidelines of the University of Iowa and Washington University Institutional  
581 Review Board (IRB).

582

583 **Animals**

584 All experimental procedures involving mice were approved by the Institutional Animal Care and  
585 Use Committee of the University of Iowa and Washington University at St. Louis. All C57BL/6  
586 mice involved in this study were purchased from Charles River Labs. Both KK.Cg-Ay/J (KKA<sup>y</sup>)  
587 and KK.Cg-Aa/J (KKA<sup>a</sup>) mice involved in study were gender and age-matched mice obtained from  
588 Jackson Labs (Stock No: 002468) and bred up for experiments. The mice were fed *ad libitum* with  
589 either regular chow (RC) or high-fat diet (Research Diets, Inc., 60 kcal% fat) with free access to  
590 water and housed in a light-, temperature- and humidity- controlled room. For high-fat diet (HFD)  
591 studies, only male mice were used and were started on HFD regimen at the age of 6-9 weeks.  
592 For all experiments involving KKA<sup>y</sup> and KKA<sup>a</sup> mice, both males and females were used at  
593 approximately 50/50 ratio. In all experiments involving mice, investigators were kept blinded both  
594 during the experiments and subsequent analysis.

595

596 **Small molecule treatment**

597 All compounds were dissolved in Kolliphor® EL (Sigma, #C5135). Either vehicle (Kolliphor® EL),  
598 SN-401 (DCPIB, 5 mg/kg of body weight/day, Tocris, D1540), SN-403, SN-406, SN-407 or

599 Inactive 1 were administered i.p. as indicated using 1cc syringe/26G X 1/2 inch needle daily for  
600 4-10 days, and in one experiment, SN-401 was administered daily for 8 weeks. SN-401,  
601 formulated as above, was also administered by oral gavage at 5 mg/kg/day for 5 days using a  
602 20G x 1.5 inch reusable metal gavage needle.

603

#### 604 **Adenovirus**

605 Human adenoviruses type 5 with hLRRC8A/SWELL1-shRNA (Ad5-mCherry-U6-  
606 hLRRC8A/SWELL1-shRNA,  $2.2 \times 10^{10}$  PFU/ml), a scrambled non-targeting control (Ad5-U6-  
607 scramble-mCherry,  $1 \times 10^{10}$  PFU/ml), Ad5-CAG-LoxP-stop-LoxP-3XFlag-SWELL1 ( $1 \times 10^{10}$   
608 PFU/ml),  $\beta$ -cell-targeted adenovirus type 5 with Ad5-RIP2-GFP ( $4.1 \times 10^{10}$  PFU/ml), GCaMP6s  
609 (Ad5-RIP1-GCaMP6s,  $4.9 \times 10^{10}$  PFU/ml), and GCaMP6s-2A-iCre (Ad5-GCaMP6s-RFP-2A-Cre,  
610  $5.8 \times 10^{10}$  PFU/ml) were obtained from Vector Biolabs. Adenovirus type 5 with Ad5-CMV-Cre-  
611 eGFP ( $8 \times 10^{10}$  PFU/ml) and Ad5-CMV-Cre-mCherry ( $3 \times 10^{10}$  PFU/ml) were obtained from the  
612 University of Iowa Viral Vector Core.

613

#### 614 **Cell culture**

615 Wildtype (WT) and SWELL1 knockout (KO) 3T3-F442A (Sigma-Aldrich) cells were cultured and  
616 differentiated as described previously<sup>24</sup>. Preadipocytes were maintained in 90% DMEM (25 mM  
617 D-Glucose and 4 mM L-Glutamine) containing 10% fetal bovine serum (FBS) and 100 IU penicillin  
618 and 100  $\mu$ g/ml streptomycin on collagen-coated (rat tail type-I collagen, Corning) plates at 37°C  
619 and 5% CO<sub>2</sub>. Upon reaching confluency, the cells were differentiated in the above-mentioned  
620 media supplemented with 5  $\mu$ g/ml insulin (Cell Applications) and replenished every other day with  
621 the differentiation media. For insulin signaling studies on WT and KO adipocytes with or without  
622 SWELL1 overexpression (O/E), the cells were differentiated for 10 days and transduced with Ad5-  
623 CAG-LoxP-stop-LoxP-SWELL1-3XFlag virus (MOI 12) on day 11 in 2% FBS containing  
624 differentiation medium. To induce the overexpression, Ad5-CMV-Cre-eGFP (or mcherry) (MOI

625 12) was added on day 13 in 2% FBS containing differentiation medium. The cells were then  
626 switched to 10% FBS containing differentiation medium from day 15 to 17. On day 18, the cells  
627 were starved in serum free media for 6 hours and stimulated with 0 and 10 nM insulin for 15 min.  
628 Either Ad5-CAG-LoxP-stop-LoxP-SWELL1-3XFlag or Ad5-CMV-Cre-eGFP (or mcherry) virus  
629 transduced cells alone were used as controls. Based on GFP/mcherry fluorescence, viral  
630 transduction efficiency was ~90%.

631

632 For SN-401 treatment and insulin signaling studies in 3T3-F442A preadipocytes, the cells were  
633 incubated with either vehicle (DMSO) or 10  $\mu$ M SN-401 for 96 hours. The cells were serum starved  
634 for 6 hours with vehicle (DMSO) or SN-401 and washed with PBS three times and stimulated with  
635 0, 3 and 10 nM insulin containing media for 15 minutes prior to collecting lysates. In the case of  
636 3T3-F442A adipocytes, the WT and KO cells were treated with either vehicle (DMSO), 1 or 10  
637  $\mu$ M SN-40X (after 7-11 days of differentiation) for 96 hours and then stimulated with 0 and 10 nM  
638 insulin/serum containing media with vehicle (DMSO) or SN-40X for 15 minutes for SWELL1  
639 detection. For AKT and AS160 signaling, the WT and KO cells were treated with either vehicle  
640 (DMSO) or 500 nM SN-401 for 96 hours and serum starved in the presence of vehicle or SN-401  
641 (500 nM) for 6 hours. The cells were washed twice in hypotonic buffer (240 mOsm; 90 mM NaCl,  
642 5 mM NaHCO<sub>3</sub>, 4.8 mM KCl, 1.2 mM KH<sub>2</sub>PO<sub>4</sub>, 2.5 mM CaCl<sub>2</sub>, 2.4 mM MgSO<sub>4</sub>, 10 mM HEPES  
643 and 25 mM Glucose, pH 7.4) and then incubated at 37 °C in hypotonic buffer for 10 minutes  
644 followed by a serum free media wash and subsequent stimulation with insulin/serum containing  
645 media for 30 minutes at 37°C without SN-401 (or vehicle). To simulate gluco-lipototoxicity, 8 mM  
646 sodium palmitate was dissolved in 18.4% fatty-acid free BSA at 37 °C in DMEM medium with 25  
647 mM glucose to obtain a conjugation ratio of 1:3 palmitate:BSA<sup>77</sup>. As described above, the 3T3-  
648 F442A adipocytes were incubated with vehicle or SN-401, SN-406, Inactive 2 at 10  $\mu$ M for 96  
649 hours and treated with 1 mM palmitate for additional 16 hours in the presence of compounds and  
650 lysates were collected and further processed.



651 HUVECs were purchased from ATCC and were grown in M199 growth media supplemented with  
652 20% FBS, 0.05g Heparin Sodium Salt (Alfa Aesar) and 15 mg ECGS (Millipore Sigma). Cells  
653 were cultured on 1% of gelatin coated plates at 37°C and 5% CO<sub>2</sub>. For SN-40X stimulated eNOS  
654 and AKT signaling assays, HUVECs were treated for 96 hours with the respective compounds  
655 and serum starved overnight (+DMSO or +SN-40X) for 16 hours in M199 media plus 1% FBS  
656 (Atlanta Biological). After the serum starve, HUVECs were returned to normal growth media for  
657 30 minutes (+DMSO or +SN-40X) prior to lysate collection. Small interfering RNA (siRNA)  
658 mediated knockdown was adapted from<sup>78</sup>. Briefly, HUVECs were transfected with either a silencer  
659 select siRNA with si-SWELL1 (Cat#4392420, sense: GCAACUUCUGGUUCAAAUUTT  
660 antisense: AAUUUGAACCCAGAAGUUGCTG, Invitrogen) or a non-targeting control silencer  
661 select siRNA (Cat# 4390846, Invitrogen) upon reaching 90-95% confluency. siRNA was  
662 transfected twice, 24 and 72 hours after initial seeding of HUVECs. Each siRNA was combined  
663 with Opti-MEM (285.25 µl, Cat#11058-021, Invitrogen) siPORT™ amine (8.75 µl, Cat#AM4503,  
664 Invitrogen) and the silencer select siRNA (6 µl) in a final volume of 300 µl. HUVECs were  
665 transfected for 4 hours at 37°C in 1% FBS containing DMEM media. For short hairpin RNA  
666 (shRNA) mediated knockdown approach, HUVECs were transduced with either human  
667 adenovirus type 5 targeting SWELL1 (Ad5-shSWELL1) or a scrambled non-targeting control  
668 (Ad5-shSCR) at a multiplicity of infection (MOI) of 50 for 24 hours at 37°C upon reaching 70%  
669 confluency. The cells were then washed with DMEM media and transduced a second time, with  
670 fresh virus, with a MOI of 25 for 12 hours at 37°C. The SN-40X compounds were present in the  
671 culture media throughout the transduction for both the si/sh RNA mediated knockdown  
672 approaches and after the final transduction step, the cells were serum starved as described above  
673 for HUVECs and lysates were collected. HEK-293 (ATCC® CRL-1573™) cells were maintained  
674 in 90% DMEM (25 mM D-Glucose and 4 mM L-Glutamine) containing 10% fetal bovine serum  
675 (FBS) and 100 IU penicillin and 100 µg/ml streptomycin.

676

## 677 **Molecular docking**

678 SN-401 and its analogs were docked into the expanded state structure of a LRRC8A-SN-401  
679 homo-hexamer in MSP1E3D1 nanodisc (PDB ID: 6NZZ) using Molecular Operating Environment  
680 (MOE) 2016.08 software package [Chemical Computing Group (Montreal, Canada)]. The 3D  
681 structure obtained from PDB (PDB ID: 6NZZ) was prepared for docking by first generating the  
682 missing loops using the loop generation functionality in Yasara software package followed by  
683 sequentially adding hydrogens, adjusting the 3D protonation state and performing energy  
684 minimization using Amber10 force-field in MOE. The ligand structures to be docked were  
685 prepared by adjusting partial charges followed by energy minimization using Amber10 force-field.  
686 The site for docking was defined by selecting the protein residues within 5Å from co-crystallized  
687 ligand (SN-401). Docking parameters were set as Placement: Triangle matcher; Scoring function:  
688 London dG; Retain Poses: 30; Refinement: Rigid Receptor; Re-scoring function: GBVI/WSA dG;  
689 Retain poses: 5. Binding poses for the compounds were predicted using the above validated  
690 docking algorithm.

691

## 692 **Chemical Synthesis**

693 **General Information:** All commercially available reagents and solvents were used directly  
694 without further purification unless otherwise noted. Reactions were monitored either by thin-layer  
695 chromatography (carried out on silica plates, silica gel 60 F<sub>254</sub>, Merck) and visualized under UV  
696 light. Flash chromatography was performed using silica gel 60 as stationary phase performed  
697 under positive air pressure. <sup>1</sup>H NMR spectra were recorded in CDCl<sub>3</sub> on a Bruker Avance  
698 spectrometer operating at 300 MHz at ambient temperature unless otherwise noted. All peaks are  
699 reported in ppm on a scale downfield from TMS and using the residual solvent peak in CDCl<sub>3</sub> (H  
700 δ = 7.26) or TMS (δ = 0.0) as an internal standard. Data for <sup>1</sup>H NMR are reported as follows:  
701 chemical shift (ppm, scale), multiplicity (s = singlet, d = doublet, t = triplet, q = quartet, m = multiplet  
702 and/or multiplet resonances, dd = double of doublets, dt = double of triplets, br = broad), coupling

703 constant (Hz), and integration. All high-resolution mass spectra (HRMS) were measured on  
704 Waters Q-ToF Premier mass spectrometer using electrospray ionization (ESI) time-of-flight (TOF).

705

706 **Scheme 1:**

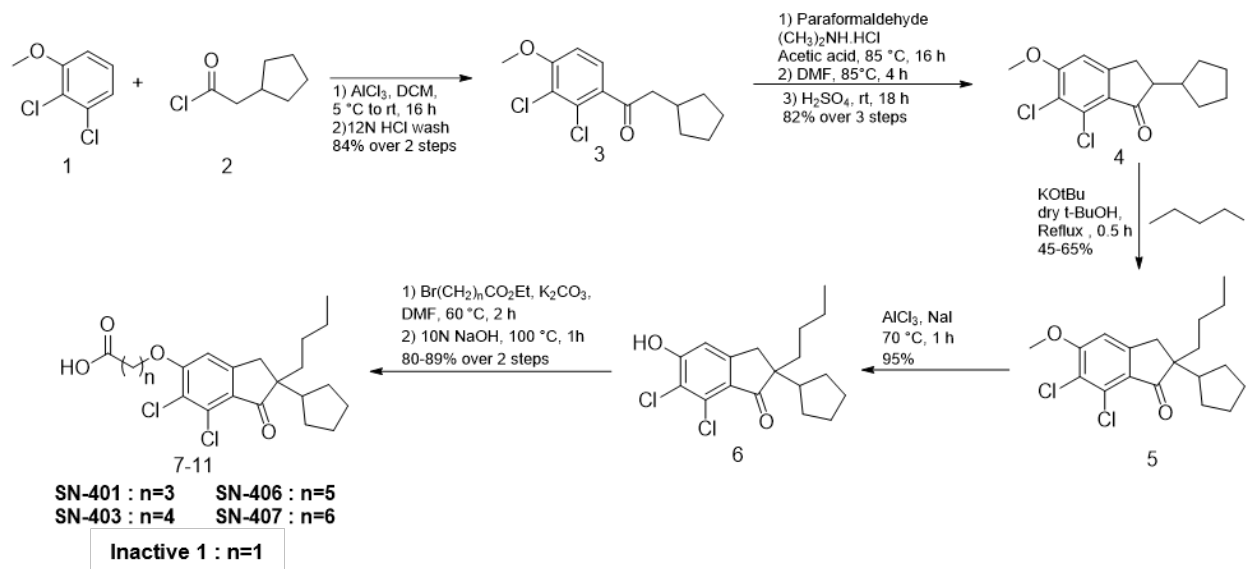

707

708

709 *2-cyclopentyl-1-(2,3-dichloro-4-methoxyphenyl)ethan-1-one (3)*: To a stirring solution of  
710 aluminum chloride (13.64 g, 102 mmol, 1.1 equiv.) in dichloromethane (250 ml) at 0 °C was added  
711 cyclopentyl acetyl chloride (15 g, 102 mmol, 1.1 equiv.) and the resulting solution was allowed to  
712 stir at 0 °C under nitrogen atmosphere for 10 minutes. To this was added a solution of 2, 3-  
713 dicholoro anisole (16.46 g, 92.9 mmol, 1 equiv.) in dichloromethane (50 ml) at 0 °C and the  
714 resulting solution was allowed to warm to room temperature and stirred for 16 hours. Once  
715 complete, the reaction was added to cold concentrated hydrochloric acid (100 ml) followed by  
716 extraction in dichloromethane (150 ml x 3). The organic fractions were pooled, concentrated and  
717 purified by silica gel chromatography using 0-15% ethyl acetate in hexanes as eluent to furnish  
718 compound **3** as white solid (22.41 g, 84%). <sup>1</sup>H NMR (300 MHz,  $\text{CDCl}_3$ )  $\delta$  7.39 (d,  $J$  = 8.7 Hz, 1H),  
719 6.89 (d,  $J$  = 8.7 Hz, 1H), 3.96 (s, 3H), 2.96 (d,  $J$  = 7.2 Hz, 2H), 2.38 – 2.21 (m, 1H), 1.92 – 1.75

720 (m, 2H), 1.69 – 1.46 (m, 4H), 1.28 – 1.05 (m, 2H). HRMS (ESI),  $m/z$  calcd for  $C_{14}H_{17}Cl_2O_2$  [M +  
721 H]<sup>+</sup> 287.0605, found 287.0603.

722

723 *6,7-dichloro-2-cyclopentyl-5-methoxy-2,3-dihydro-1H-inden-1-one* (**4**): To 2-cyclopentyl-1-(2,3-  
724 dichloro-4-methoxyphenyl)ethan-1-one (**3**) (21.5 g, 74.8 mmol, 1 equiv.) in a round bottom flask  
725 was added paraformaldehyde (6.74 g, 224.5 mmol, 3 equiv.), dimethylamine hydrochloride (30.52  
726 g, 374 mmol, 5 equiv.) and acetic acid (2.15 ml) and the resulting mixture was allowed to stir at  
727 85 °C for 16 hours. To the reaction was then added dimethylformamide (92 ml) and the resulting  
728 solution was allowed to stir at 85 °C for 4 hours. Once complete, the reaction was diluted with  
729 ethyl acetate and then washed with 1N hydrochloric acid. The organic fractions were collected  
730 and concentrated under vacuum and used for next step without purification. To the concentrated  
731 product in a round bottom flask was added cold concentrated sulfuric acid (120 ml) at 0 °C and  
732 the resulting solution was allowed to stir at room temperature for 18 hours. Once complete, the  
733 reaction was diluted with cold water and extracted thrice with ethyl acetate (100 ml). The organic  
734 fractions were pooled, concentrated and purified by silica gel chromatography using 0-15% ethyl  
735 acetate in hexanes as eluent to furnish compound **4** as beige solid (18.36 g, 82%). <sup>1</sup>H NMR (300  
736 MHz, CDCl<sub>3</sub>) δ 6.88 (s, 1H), 4.00 (s, 3H), 3.16 (dd,  $J = 18.1, 8.7$  Hz, 1H), 2.80 (d,  $J = 14.4$  Hz,  
737 2H), 2.43 – 2.22 (m, 1H), 1.96 (s, 1H), 1.73 – 1.48 (m, 5H), 1.46 – 1.33 (m, 1H), 1.17 – 1.00 (m,  
738 1H). LRMS (ESI),  $m/z$  calcd for  $C_{15}H_{17}Cl_2O_2$  [M + H]<sup>+</sup> 299.0605, found 299.0614.

739

740 *2-butyl-6,7-dichloro-2-cyclopentyl-5-methoxy-2,3-dihydro-1H-inden-1-one* (**5**): A stirring  
741 suspension of **4** (23 gm, 76.8 mmol, 1 equiv.) in anhydrous tert-butanol (220 ml) was allowed to  
742 reflux at 95 °C for 30 minutes. To the resulting solution was added potassium tert-butanol (1M in  
743 tert-butanol) (84 ml, 84.5 mmol, 1.1 equiv.) and the resulting solution was refluxed for 30 minutes.  
744 The reaction was then cooled to room temperature followed by addition of iodobutane (44.2 ml,  
745 384 mmol, 5 equiv.) and the reaction was then allowed to reflux for additional 60 minutes. The

746 reaction was allowed to cool, concentrated and purified by silica gel chromatography using 0-10%  
747 ethyl acetate in hexanes as eluent to furnish compound **5** as clear oil (17.75 g, 65%). <sup>1</sup>H NMR  
748 (300 MHz, CDCl<sub>3</sub>) δ 6.89 (s, 1H), 4.09 – 3.90 (m, 3H), 2.98 – 2.70 (m, 2H), 2.36 – 2.18 (m, 1H),  
749 1.89 – 1.71 (m, 2H), 1.58 – 1.42 (m, 5H), 1.33 – 1.09 (m, 4H), 1.09 – 0.94 (m, 2H), 0.93 – 0.73  
750 (m, 4H). HRMS (ESI), *m/z* calcd for C<sub>19</sub>H<sub>25</sub>Cl<sub>2</sub>O<sub>2</sub> [M + H]<sup>+</sup> 355.1231, found 355.1231.

751  
752 2-butyl-6,7-dichloro-2-cyclopentyl-5-hydroxy-2,3-dihydro-1H-inden-1-one (**6**): To **5** (3.14 g, 8.87  
753 mmol, 1 equiv.) was added aluminum chloride (2.36g, 17 mmol, 2 equiv.) and sodium iodide (2.7  
754 g, 17 mmol, 2 equiv.) and the resulting solid mixture was triturated and allowed to stir at 70 °C for  
755 60 minutes. Once complete, the reaction was diluted with dichloromethane and washed with  
756 aqueous saturated sodium thiosulfate solution. The organic fractions were collected and  
757 concentrated to give a beige solid which was then washed multiple times with hexanes to provide  
758 compound **6** as white solid (2.87 g, 95%). <sup>1</sup>H NMR (300 MHz, CDCl<sub>3</sub>) δ 7.03 (s, 1H), 6.32 (s, 1H),  
759 2.97 – 2.73 (m, 2H), 2.36 – 2.17 (m, 1H), 1.88 – 1.68 (m, 2H), 1.62 – 1.39 (m, 6H), 1.31 – 1.11  
760 (m, 3H), 1.08 – 0.97 (m, 2H), 0.97 – 0.87 (m, 1H), 0.83 (t, *J* = 7.3 Hz, 3H). HRMS (ESI), *m/z* calcd  
761 for C<sub>18</sub>H<sub>23</sub>Cl<sub>2</sub>O<sub>2</sub> [M + H]<sup>+</sup> 341.1075, found 341.1089.

762  
763 *2-((2-butyl-6,7-dichloro-2-cyclopentyl-1-oxo-2,3-dihydro-1H-inden-5-yl)oxy)acetic acid (7)*  
764 (Inactive **1**): To a stirring solution of **6** (170 mg, 0.50 mmol, 1 equiv.) in anhydrous  
765 dimethylformamide (1 ml) was added potassium carbonate (76 mg, 0.56 mmol, 1.1 equiv.) and  
766 ethyl 2-bromoacetate (61 ml, 0.56 mmol, 1.1 equiv.) and the reaction was allowed to stir at 60 °C  
767 for 2 hours. Once complete, to the reaction was added 4 N NaOH (1 ml) and the reaction was  
768 allowed to stir at 100 °C for 60 minutes. Once complete, reaction was concentrated and purified  
769 by column chromatography using 0-10% methanol in dichloromethane as eluent to provide  
770 **Inactive 1** as a clear solid (173 mg, 87%). <sup>1</sup>H NMR (300 MHz, CDCl<sub>3</sub>) δ 6.80 (s, 1H), 5.88 (s, 1H),  
771 4.88 (s, 2H), 2.87 (q, *J* = 17.9 Hz, 2H), 2.34 – 2.20 (m, 1H), 1.91 – 1.69 (m, 2H), 1.66 – 1.39 (m,

772 6H), 1.32 – 1.13 (m, 3H), 1.10 – 0.95 (m, 2H), 0.94 – 0.86 (m, 1H), 0.83 (t,  $J = 7.3$  Hz, 3H). HRMS  
773 (ESI),  $m/z$  calcd for  $C_{20}H_{25}Cl_2O_4$   $[M + H]^+$  399.1130, found 399.1132.

774  
775 *4-((2-butyl-6,7-dichloro-2-cyclopentyl-1-oxo-2,3-dihydro-1H-inden-5-yl)oxy)butanoic acid (8) (SN-*  
776 **401)**: To a stirring solution of **6** (100 mg, 0.29 mmol, 1 equiv.) in anhydrous dimethylformamide  
777 (1 ml) was added potassium carbonate (45 mg, 0.32 mmol, 1.1 equiv.) and ethyl 4-bromobutyrate  
778 (46 ml, 0.32 mmol, 1.1 equiv.) and the reaction was allowed to stir at 60 °C for 2 hours. Once  
779 complete, to the reaction was added 4 N NaOH (1 ml) and the reaction was allowed to stir at 100  
780 °C for 60 minutes. Once complete, reaction was concentrated and purified by column  
781 chromatography using 0-10% methanol in dichloromethane as eluent to provide **SN-401** as a  
782 clear solid (111 mg, 89%).  $^1H$  NMR (300 MHz,  $CDCl_3$ )  $\delta$  10.77 (s, 1H), 6.86 (s, 1H), 4.21 (t,  $J =$   
783 5.9 Hz, 2H), 2.88 (t,  $J = 14.4$  Hz, 2H), 2.69 (t,  $J = 7.0$  Hz, 2H), 2.26 (dd,  $J = 12.6, 6.1$  Hz, 3H),  
784 1.87 – 1.73 (m, 2H), 1.64 – 1.44 (m, 6H), 1.35 – 1.10 (m, 4H), 1.08 – 0.95 (m,  $J = 15.0, 7.7$  Hz,  
785 2H), 0.82 (t,  $J = 7.3$  Hz, 3H). HRMS (ESI),  $m/z$  calcd for  $C_{22}H_{29}Cl_2O_4$   $[M + H]^+$  427.1443, found  
786 427.1446.

787  
788 *5-((2-butyl-6,7-dichloro-2-cyclopentyl-1-oxo-2,3-dihydro-1H-inden-5-yl)oxy)pentanoic acid (9)*  
789 **(SN-403)**: To a stirring solution of **6** (100 mg, 0.29 mmol, 1 equiv.) in anhydrous  
790 dimethylformamide (1 ml) was added potassium carbonate (45 mg, 0.32 mmol, 1.1 equiv.) and  
791 ethyl 6-bromovalerate (51 ml, 0.32 mmol, 1.1 equiv.) and the reaction was allowed to stir at 60 °C  
792 for 2 hours. Once complete, to the reaction was added 4 N NaOH (1 ml) and the reaction was  
793 allowed to stir at 100 °C for 60 minutes. Once complete, reaction was concentrated and purified  
794 by column chromatography using 0-10% methanol in dichloromethane as eluent to provide **SN-**  
795 **403** as a clear solid (114 mg, 88%).  $^1H$  NMR (300 MHz,  $CDCl_3$ )  $\delta$  10.95 (s, 1H), 6.85 (brs, 1H),  
796 4.16 (t,  $J = 5.7$  Hz, 2H), 2.96 – 2.75 (m, 2H), 2.61 – 2.44 (m, 2H), 2.35 – 2.17 (m, 1H), 2.10 – 1.87  
797 (m, 4H), 1.86 – 1.70 (m, 2H), 1.66 – 1.38 (m, 6H), 1.32 – 1.13 (m, 3H), 1.08 – 0.96 (m, 2H), 0.94

798 – 0.86 (m, 1H), 0.86 – 0.73 (m, 3H). HRMS (ESI),  $m/z$  calcd for  $C_{23}H_{31}Cl_2O_4$   $[M + H]^+$  441.1599,  
799 found 441.1601.

800

801 *6-((2-butyl-6,7-dichloro-2-cyclopentyl-1-oxo-2,3-dihydro-1H-inden-5-yl)oxy)hexanoic acid (10)*

802 (**SN-406**): To a stirring solution of **6** (100 mg, 0.29 mmol, 1 equiv.) in anhydrous

803 dimethylformamide (1 ml) was added potassium carbonate (45 mg, 0.32 mmol, 1.1 equiv.) and

804 ethyl 6-bromohexanoate (58 ml, 0.32 mmol, 1.1 equiv.) and the reaction was allowed to stir at 60

805 °C for 2 hours. Once complete, to the reaction was added 4 N NaOH (1 ml) and the reaction was

806 allowed to stir at 100 °C for 60 minutes. Once complete, reaction was concentrated and purified

807 by column chromatography using 0-10% methanol in dichloromethane as eluent to provide **SN-**

808 **406** as a clear solid (115 mg, 86%).  $^1H$  NMR (300 MHz,  $CDCl_3$ )  $\delta$  11.70 (s, 1H), 6.85 (s, 1H), 4.13

809 (t,  $J = 6.2$  Hz, 2H), 2.93 – 2.74 (m, 2H), 2.43 (t,  $J = 7.3$  Hz, 2H), 2.32 – 2.17 (m, 1H), 1.98 – 1.87

810 (m, 2H), 1.85 – 1.68 (m, 4H), 1.66 – 1.40 (m, 8H), 1.28 – 1.12 (m, 3H), 1.07 – 0.93 (m, 2H), 0.91

811 – 0.70 (m, 4H). HRMS (ESI),  $m/z$  calcd for  $C_{24}H_{33}Cl_2O_4$   $[M + H]^+$  455.1756, found 455.1756.

812

813 *7-((2-butyl-6,7-dichloro-2-cyclopentyl-1-oxo-2,3-dihydro-1H-inden-5-yl)oxy)heptanoic acid (11)*

814 (**SN-407**): To a stirring solution of **6** (100 mg, 0.29 mmol, 1 equiv.) in anhydrous

815 dimethylformamide (1 ml) was added potassium carbonate (45 mg, 0.32 mmol, 1.1 equiv.) and

816 ethyl 7-bromoheptanoate (63 ml, 0.32 mmol, 1.1 equiv.) and the reaction was allowed to stir at 60

817 °C for 2 hours. Once complete, to the reaction was added 4 N NaOH (1 ml) and the reaction was

818 allowed to stir at 100 °C for 60 minutes. Once complete, reaction was concentrated and purified

819 by column chromatography using 0-10% methanol in dichloromethane as eluent to provide **SN-**

820 **407** as a clear solid (122 mg, 89%).  $^1H$  NMR (300 MHz,  $CDCl_3$ )  $\delta$  11.52 (s, 1H), 6.85 (s, 1H), 4.12

821 (t,  $J = 6.3$  Hz, 2H), 2.84 (q,  $J = 18.2$  Hz, 2H), 2.47 – 2.32 (m, 2H), 2.32 – 2.18 (m, 1H), 1.96 – 1.84

822 (m, 2H), 1.83 – 1.64 (m, 4H), 1.62 – 1.39 (m, 10H), 1.28 – 1.14 (m, 3H), 1.08 – 0.94 (m, 2H), 0.91



823 (d,  $J = 8.5$  Hz, 1H), 0.81 (t,  $J = 7.3$  Hz, 3H). HRMS (ESI),  $m/z$  calcd for  $C_{25}H_{35}Cl_2O_4$  [ $M +$   
824  $H$ ] $^+$  469.1912, found 469.1896.

825

826 **Scheme 2:**

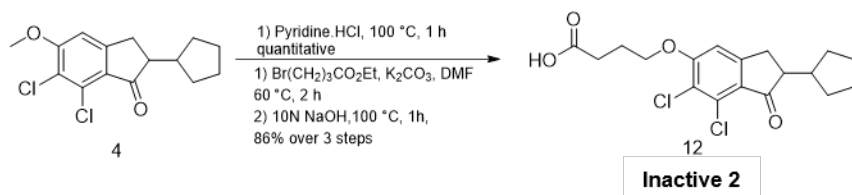

827

828 *4-((6,7-dichloro-2-cyclopentyl-1-oxo-2,3-dihydro-1H-inden-5-yl)oxy)butanoic acid (12)* (Inactive

829 2): To **4** (100 mg, 0.36 mmol, 1 equiv.) was added aluminum chloride (89 mg, 0.67 mmol, 2 equiv.)

830 and sodium iodide (101 mg, 0.67 mmol, 2 equiv.) and the resulting solid mixture was triturated

831 and allowed to stir at 70 °C for 60 minutes. Once complete, the reaction was diluted with

832 dichloromethane and washed with aqueous saturated sodium thiosulfate solution. The organic

833 fractions were collected and concentrated to give a beige solid which was then washed multiple

834 times with hexanes to provide phenol intermediate as white solid which was used for the next

835 step. To a stirring solution of the product from the first step in anhydrous dimethylformamide (1

836 ml) was added potassium carbonate (53 mg, 0.39 mmol, 1.1 equiv.) and ethyl 4-bromobutyrate

837 (55 ml, 0.39 mmol, 1.1 equiv.) and the reaction was allowed to stir at 60 °C for 2 hours. Once

838 complete, to the reaction was added 4 N NaOH (1 ml) and the reaction was allowed to stir at 100

839 °C for 60 minutes. Once complete, reaction was concentrated and purified by column

840 chromatography using 0-10% methanol in dichloromethane as eluent to provide Inactive 2 as a

841 clear solid (107 mg, 86%). <sup>1</sup>H NMR (300 MHz, CDCl<sub>3</sub>) δ 6.87 (s, 1H), 4.21 (t,  $J = 5.9$  Hz, 2H), 3.26

842 – 3.02 (m, 1H), 2.94 – 2.56 (m, 4H), 2.40 – 2.19 (m, 3H), 2.03 – 1.90 (m, 1H), 1.74 – 1.50 (m,

843 5H), 1.47 – 1.32 (m, 1H), 1.19 – 1.00 (m, 1H). HRMS (ESI),  $m/z$  calcd for  $C_{18}H_{21}Cl_2O_4$  [ $M +$

844  $H$ ] $^+$  371.0817, found 371.0808.

845



846 **Scheme 3:**

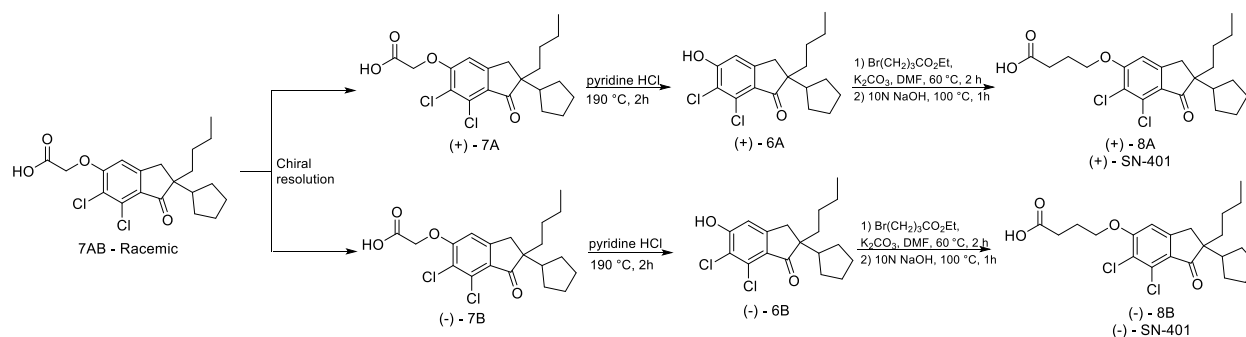

847

848 Enantiomerically enriched **SN-401** isomers were synthesized following literature reported

849 procedure and as depicted in scheme 3<sup>1</sup>. In brief, racemic compound **7** (1 equiv.) was dissolved

850 along with cinchonine (1 equiv.) in minimum amount of hot DMF and the allowed to cool. The

851 precipitated salt was separated (filtrate used to obtain opposite enantiomer) and recrystallized 5

852 additional times from DMF, followed by acidification of salt with aqueous HCl and extraction into

853 ether. The ether was evaporated under vacuum to furnish the enantiomerically enriched **(+) – 7A**

854 in 23% yield;  $[\alpha]_{D}^{25} +16.8^{\circ}$  (c 5, EtOH). The DMF filtrate from the first step now enriched in **(-) –**

855 **7B** was concentrated and acidified with aqueous HCl and extracted in ether and concentrated to

856 give solid. This resulting solid (1 equiv.) was dissolved with cinchonidine (1 equiv.) in minimum

857 amount of hot ethanol and then allowed to cool. The precipitated salt was separated and

858 recrystallized 5 additional times from DMF, followed by acidification of salt with aqueous HCl and

859 extraction into ether. The ether was evaporated under vacuum to furnish enantiomerically

860 enriched **(-) – 7A** in 19% yield;  $[\alpha]_{D}^{25} -15.6^{\circ}$  (c 5, EtOH). The enantiomerically enriched **7A** and

861 **7B** were then subjected to same two step reaction sequence involving transformation to

862 respective phenols **(+) - 6A** and **(-) – 6B** followed by conversion to desired enantiomerically

863 enriched oxybutyric acids **(+) - 8A**  $[\alpha]_{D}^{25} +15.9^{\circ}$  (c 5, EtOH) and **(-) – 8B**  $[\alpha]_{D}^{25} -14.5^{\circ}$  (c 5, EtOH).

864 The <sup>1</sup>H NMR and HRMS for enantiomerically enriched products are same as racemic compounds

865 and thus not reported.

866

## 867 **Electrophysiology**

868 Patch-clamp recordings of  $\beta$ -cells, 3T3-F442A adipocytes and mature human adipocytes were  
869 performed as described previously<sup>24,27</sup>. 3T3-F442A WT and KO preadipocytes were prepared as  
870 described in the Cell culture section above. For SWELL1 overexpression recordings,  
871 preadipocytes were first transduced with Ad5-CAG-LoxP-stop-LoxP-3XFlag-SWELL1 (MOI 12) in  
872 2% FBS culture medium for two days and then overexpression induced by adding Ad5-CMV-Cre-  
873 eGFP (MOI 10-12) in 2% FBS culture medium for two more days and changed to 10% FBS  
874 containing culture media and were selected based on GFP expression (~2-3 days). For  $\beta$ -cell  
875 recordings, islets were transduced with Ad-RIP2-GFP and then dispersed after 48-72 hours for  
876 patch-clamp experiments. GFP+ cells marked  $\beta$ -cells selected for patch-clamp recordings. Non-  
877 T2D islets were isolated from mice on regular chow diet between 8-13 weeks of age. Of these  
878 mice, 4 had an average body weight of  $28.6 \pm 0.51$  g and blood glucose level of  $148 \pm 6.49$  mg/dl  
879 respectively. T2D islets were obtained from mice fed with HFD for 4-5 months and their average  
880 body weight and glucose levels were  $52.7 \pm 3.0$  g and  $229 \pm 21.4$  mg/dl, respectively. For  
881 measuring  $I_{Cl,SWELL}$  inhibition by SN-401 congeners after activation of  $I_{Cl,SWELL}$ , HEK-293 cells were  
882 perfused with hypotonic solution (Hypo, 210 mOsm) described below and then SN-401 congeners  
883 + Hypo applied at 10 and 7  $\mu$ M to assess for %  $I_{Cl,SWELL}$  inhibition. To assess for  $I_{Cl,SWELL}$  inhibition  
884 upon application of SN-401 congeners to the closed SWELL1-LRRC8 channel, HEK-293 cells  
885 were pre-incubated with vehicle (or SN-401, SN-406, Inactive 1 and Inactive 2) for 30 mins prior  
886 to hypotonic stimulation and then stimulated with hypotonic solution + SN-401 congeners.  
887 Recordings were measured using Axopatch 200B amplifier paired to a Digidata 1550 digitizer  
888 using pClamp 10.4 software. The extracellular buffer composition for hypotonic stimulation  
889 contains 90 mM NaCl, 2 mM CsCl, 1 mM MgCl<sub>2</sub>, 1 mM CaCl<sub>2</sub>, 10 mM HEPES, 10 mM Mannitol,  
890 pH 7.4 with NaOH (210 mOsm/kg). The extracellular isotonic buffer composition is same as  
891 above, but with mannitol concentration at 110 mM to raise the osmolarity to 300 mOsm/kg. The  
892 composition of intracellular buffer is 120 mM L-aspartic acid, 20 mM CsCl, 1 mM MgCl<sub>2</sub>, 5 mM

893 EGTA, 10 mM HEPES, 5 mM MgATP, 120 mM CsOH, 0.1 mM GTP, pH 7.2 with CsOH. All  
894 recordings were carried out at room temperature (RT) with HEK-293 cells,  $\beta$ -cells and 3T3-F442A  
895 cells performed in whole-cell configuration and human adipocytes in perforated-patch  
896 configuration, as previously<sup>24,27</sup>.

897

## 898 **Western blot**

899 Adipocytes were washed twice in ice-cold phosphate buffer saline and lysed in RIPA buffer (150  
900 mM NaCl, 20 mM HEPES, 1% NP-40, 5 mM EDTA, pH 7.4) with proteinase/phosphatase inhibitors  
901 (Roche). The cell lysate was further sonicated in 10 sec cycle intervals for 2-3 times and  
902 centrifuged at 14000 rpm for 30 min at 4°C and repeated one more time to remove the excess  
903 fat. The supernatant was collected and further estimated for protein concentration using DC  
904 protein assay kit (Bio-Rad). Fat tissues were homogenized and suspended in RIPA buffer with  
905 inhibitors and further processed in similar fashion as described above. HUVECs were also  
906 prepared in a similarly except the lysates were spun only once to remove the cells debris and  
907 obtain the clear supernatant. Human islets were washed twice with phosphate buffer saline (PBS)  
908 and lysed using RIPA buffer containing protease and phosphatase inhibitors. The lysate was  
909 further clarified by freezing in liquid nitrogen for about 10 s for three cycles. The supernatant was  
910 collected from the whole lysate centrifuged at 12,000 rpm for 20 min at 4 °C. Protein samples  
911 were further prepared by boiling in 4X laemmli buffer. Approximately 10-50  $\mu$ g of total protein was  
912 loaded in 4-15% gradient gel (Bio-Rad) for separation and protein transfer was carried out onto  
913 the PVDF membranes (Bio-Rad). Membranes were blocked in 5% BSA (or 5% milk for SWELL1)  
914 in TBST buffer (0.2 M Tris, 1.37 M NaCl, 0.2% Tween-20, pH 7.4) for 1 h and incubated with  
915 appropriate primary antibodies (5% BSA or milk) overnight at 4°C. The membranes were further  
916 washed in TBST buffer before adding secondary antibody (Bio-Rad, Goat-anti-rabbit, #170-6515)  
917 in 1% BSA (or 1% milk for SWELL1) in TBST buffer for 1 h at RT. The signals were developed by  
918 chemiluminescence (Pierce) and visualized using a Chemidoc imaging system (Biorad). The

919 images were further analyzed for band intensities using ImageJ software. Following primary  
920 antibodies were used: anti-phospho-AKT2 (#8599s), anti-AKT2 (#3063s), anti-AKT (#4685), anti-  
921 phospho-AS160 (#4288s), anti-AS160 (#2670s), anti-GAPDH (#D16H11), p-eNOS (#9571), Total  
922 eNOS (#32027) and anti- $\beta$ -actin (#8457s) from Cell Signaling; anti-SWELL1 as previously  
923 described<sup>2</sup>.

924

## 925 **Immunofluorescence**

926 3T3-F442A preadipocytes (WT, KO) and differentiated adipocytes without or with SWELL1  
927 overexpression (WT+SWELL1 O/E, KO+SWELL1 O/E) were prepared as described in the Cell  
928 culture section on collagen coated coverslips. In the case of SWELL1 membrane trafficking, the  
929 3T3-F442A preadipocytes were incubated in the presence of vehicle (or SN-401, SN-406 and  
930 Inactive 1) at either 1 or 10  $\mu$ M for 48h and further processed. The cells were fixed in ice-cold  
931 acetone for 15 min at -20°C and then washed four times with 1X PBS and permeabilized with  
932 0.1% Triton X-100 in 1X PBS for 5 min at RT and subsequently blocked with 5% normal goat  
933 serum for 1 h at RT. Either anti-SWELL1 (1:400) or anti-Flag (1:1500, Sigma #F3165) antibody  
934 were added to the cells and incubated overnight at 4°C. The cells were then washed three times  
935 (1X PBS) prior and after addition of 1:1000 Alexa Fluor 488/568 secondary antibody (anti-rabbit,  
936 #A11034 or anti-mouse, #A11004) for 1 h at RT. Cells were counterstained with nuclear TO-PRO-  
937 3 (Life Technologies, #T3605) or DAPI (Invitrogen, #D1306) staining (1  $\mu$ M) for 20 min followed  
938 by three washes with 1X PBS. Coverslips were further mounted on slides with ProLong Diamond  
939 anti-fading media. All images were captured using Zeiss LSM700/LSM510 confocal microscope  
940 with 63X objective (NA 1.4). SWELL1 membrane localization was quantified by stacking all the z-  
941 images and converting it into a binary image where the cytoplasmic intensity per unit area was  
942 subtracted from the total cell intensity per unit area using ImageJ software.

943

944

945 **Metabolic phenotyping**

946 Mice were fasted for 6 h prior to glucose tolerance tests (GTT). Baseline glucose levels at 0 min  
947 timepoint (fasting glucose, FG) were measured from blood sample collected from tail snipping  
948 using glucometer (Bayer Healthcare LLC). Either 1 g or 0.75 g D-Glucose/kg body weight were  
949 injected (i.p.) for lean or HFD mice, respectively and glucose levels were measured at 7, 15, 30,  
950 60, 90 and 120 min timepoints after injection. For insulin tolerance tests (ITTs), the mice were  
951 fasted for 4 h. Similar to GTTs, the baseline blood glucose levels were measured at 0 min  
952 timepoint and 15, 30, 60, 90 and 120 min timepoints post-injection (i.p.) of insulin (HumulinR,  
953 1U/kg body weight for lean mice or 1.25 U/kg body weight for HFD mice). GTTs or ITTs with  
954 vehicle (or SN-401, SN-403, SN-406, SN-407 and Inactive 1) treated groups were performed  
955 approximately 24 hours after the last injection. For measuring serum insulin levels, the vehicle (or  
956 SN-401, SN-406 and Inactive 1) treated HFD mice were fasted for 6 h and injected (i.p.) with 0.75  
957 g D-Glucose/kg body weight and blood samples collected at 0, 7, 15 and 30 min time points in  
958 microvette capillary tubes (SARSTEDT, #16.444) and centrifuged at 2000Xg for 20 min at 4°C.  
959 The collected plasma was then measured for insulin content by using Ultra-Sensitive Mouse  
960 Insulin ELISA Kit (Crystal Chem, #90080). All mouse studies were performed in a blinded fashion.  
961 Body weights for all the mice are listed in **Supplementary Table. S5**.

962

963 **Murine islet isolation and perfusion assay**

964 For patch-clamp studies involving primary mouse  $\beta$ -cells, mice were anesthetized by injecting  
965 Avertin (0.0125 g/ml in H<sub>2</sub>O) followed by cervical dislocation. HFD or polygenic KKAy mice treated  
966 with either vehicle or SN-401, SN-406, SN-407 and Inactive 1 were anesthetized with 1-4%  
967 isoflurane followed by cervical dislocation. Islets were further isolated as described previously<sup>27</sup>.  
968 Human islets were cultured in RPMI media with 2% FBS overnight. The next day either scramble  
969 or shSWELL1 adenoviral transduction was carried out (final concentration of  $5 \times 10^7$  PFU/ml)  
970 and the islets were incubated for 12 h. The islets were then washed with PBS three times and

971 cultured in RPMI medium with 10% FBS for 4–5 days. For SN-401/Palmitate experiments, human  
972 islets were either transduced with adenoviral short hairpin for control (shScramble) or SWELL1  
973 knockdown (shSWELL1) and murine islets isolated from floxed-SWELL1 mouse (SWELL1<sup>fl/fl</sup>)  
974 were either transduced with adenoviral control (Ad-RIP1-GCaMP6s) or Cre-recombinase (Ad-  
975 RIP1-GCaMP6s-2A-Cre) virus for 12 hours respectively in 2% FBS containing RPMI media. The  
976 islets were then washed in 1XPBS for three times and treated with either vehicle or SN-401 (10  
977  $\mu$ M) for 96 hours followed by treatment with 1:3 palmitate:BSA with or without SN-401 in 10%  
978 FBS containing RPMI media for 16 h (**Fig. 7c**). The GSIS perfusion assay for islets were  
979 performed using a PERI4-02 from Biorep Technologies. For each experiment, around 50 freshly  
980 isolated islets (all from the same isolation batch) were handpicked to match size of islets across  
981 the samples and loaded into the polycarbonate perfusion chamber between two layers of  
982 polyacrylamide-microbead slurry (Bio-Gel P-4, BioRad) by the same experienced operator.  
983 Perfusion buffer contained (in mM): 120 NaCl, 24 NaHCO<sub>3</sub>, 4.8 KCl, 2.5 CaCl<sub>2</sub>, 1.2 MgSO<sub>4</sub>, 10  
984 HEPES, 2.8 glucose, 27.2 mannitol, 0.25% w/v bovine serum albumin, pH 7.4 with NaOH (300  
985 mOsm/kg). Perfusion buffer kept at 37°C was circulated at 120  $\mu$ l/min. After 48 min of washing  
986 with 2.8 mM glucose solution for stabilization, islets were stimulated with the following sequence:  
987 16 min of 16.7 mM glucose, 40 min of 2.8 mM glucose, 10 min of 30 mM KCl, and 12 min of 2.8  
988 mM glucose. Osmolarity was matched by adjusting mannitol concentration when preparing  
989 solution containing 16.7 mM glucose. Serial samples were collected either every 1 or 2 min into  
990 96 wells kept at 4°C. Insulin concentrations were further determined using commercially available  
991 ELISA kit (Merckodia). The area under the curve (AUC) for the high-glucose induced insulin  
992 release was calculated for time points between 50 to 74/84 min. At the completion of the  
993 experiments, islets were further lysed by addition of RIPA buffer and the amount of insulin was  
994 detected by ELISA.

995

996

997 **Drug pharmacokinetics**

998 The pharmacokinetic studies for SN-401 and SN-406 were performed at Charles River Laboratory  
999 as outlined below. Male C57/BL6 mice were used in the study and assessed for a single dose (5  
1000 mg/kg) administration. The compounds were prepared in Cremaphor for i.p. and p.o dose routes  
1001 and in 5% ethanol, 10% Tween-20 and water mix for i.v. route at a final concentration of 1 mg/mL.  
1002 Terminal blood samples were collected via cardiac venipuncture under anesthesia at time points  
1003 0.08, 0.5, 2, 8 h post dose for i.v and at timepoints 0.25, 2, 8, 24 h post dose for i.p. and p.o.  
1004 groups respectively with a sample size of 3 mice per timepoint. The blood samples were collected  
1005 in tubes with K2 EDTA anticoagulant and further processed to collect plasma by centrifugation at  
1006 3500 rpm at 5 °C for 10 min. Samples were further processed in LC/MS to determine the  
1007 concentration of the compounds. Non-compartmental analysis was performed to obtain the PK  
1008 parameters using the PKPlus software package (Simulation Plus). The area under the plasma  
1009 concentration-time curve ( $AUC_{inf}$ ) is calculated from time 0 to infinity where the  $C_{max}$  is the maximal  
1010 concentration achieved in plasma and  $t_{1/2}$  is the terminal elimination half-life. Oral bioavailability  
1011 was calculated as  $AUC_{Oral}/AUC_{IV} * 100$ .

1012

1013 **Hyperinsulinemic euglycemic glucose clamps**

1014 Sterile silicone catheters (Dow-Corning) were placed into the jugular vein of mice under isoflurane  
1015 anesthesia. Placed catheter was flushed with 200 U/mL heparin in saline and the free end of the  
1016 catheter was directed subcutaneously via a blunted 14-gauge sterile needle and connected to a  
1017 small tubing device that exited through the back of the animal. Mice were allowed to recover from  
1018 surgery for 3 days, then received IP injections of vehicle or SN-401 (5 mg/kg) for 4 days.  
1019 Hyperinsulinemic euglycemic clamps were performed on day 8 post-surgery on unrestrained,  
1020 conscious mice as described elsewhere<sup>79,80</sup>, with some modifications. Mice were fasted for 6 h at  
1021 which time insulin and glucose infusion were initiated (time 0). At 80 min prior to time 0 basal  
1022 sampling was conducted, where whole-body glucose flux was traced by infusion of 0.05  $\mu$ Ci/min



1023 D-[3-<sup>3</sup>H]-glucose (Perkin Elmer), after a priming 5  $\mu$ Ci bolus for 1 minute. After the basal period,  
1024 starting at time 0 D-[3-<sup>3</sup>H]-glucose was continuously infused at the 0.2  $\mu$ Ci/min rate and the  
1025 infusion of insulin (Humulin, Eli Lilly) was initiated with a bolus of 80 mU/kg/min (10  $\mu$ l volume for  
1026 1 min) then followed by continuous infusion of insulin at the dose of 8 mU/kg/min throughout the  
1027 assay. Fifty percent dextrose (Hospira) was infused at a variable rates (GIR) starting at the same  
1028 time as the initiation of insulin infusion to maintain euglycemia at the targeted level of 150 mg/dL  
1029 (8.3 mM). Blood glucose (BG) measurements were taken every ten minutes via tail vein sampling  
1030 using Contour glucometer (Bayer). After mouse reached stable BG and GIR (typically, after 75  
1031 minutes since starting the insulin infusion; for some mice, a longer time was required to achieve  
1032 steady state) a single bolus of 12  $\mu$ Ci of [1-<sup>14</sup>C]-2-deoxy-D-glucose (Perkin Elmer) in 96  $\mu$ l of  
1033 saline was administered. Plasma samples (collected from centrifuged blood) for determination of  
1034 tracers enrichment, glucose level and insulin concentration were obtained at times -80, -20, -10,  
1035 0, and every 10 min starting at 80 min post-insulin (5 min. after [1-<sup>14</sup>C]-2-deoxy-D-glucose bolus  
1036 was administered) until the conclusion of the assay at 140 min. Tissue samples were then  
1037 collected from mice under isoflurane anesthesia from organs of interest (e.g., liver, heart, kidney,  
1038 white adipose tissue, brown adipose tissue, gastrocnemius, soleus etc.) for determination of 1-  
1039 <sup>14</sup>C]-2-deoxy-D-glucose tracer uptake. Plasma and tissue samples were processed as described  
1040 previously<sup>79</sup>. Briefly, plasma samples were deproteinized with Ba(OH)<sub>2</sub> and ZnSO<sub>4</sub> and dried to  
1041 eliminate tritiated water. The glucose turnover rate (mg/kg-min) was calculated as the rate of  
1042 tracer infusion (dpm/min) divided by the corrected plasma glucose specific activity (dpm/mg) per  
1043 kg body weight of the mouse. Fluctuations from steady state were accounted for by use of Steele's  
1044 model. Plasma glucose was measured using Analox GMD9 system (Analox Technologies).

1045

1046 Tissue samples (~30 mg each) were homogenized in 750  $\mu$ l of 0.5% perchloric acid, neutralized  
1047 with 10 M KOH and centrifuged. The supernatant was then used for first measuring the  
1048 abundance of total [1-<sup>14</sup>C] signal (derived from both 1-<sup>14</sup>C -2-deoxy-D-glucose ,1-<sup>14</sup>C -2-deoxy-D-



1049 glucose 6 phosphate) and, following a precipitation step with 0.3 N Ba(OH)<sub>3</sub> and 0.3 N ZnSO<sub>4</sub>, for  
1050 the measuring of non-phosphorylated 1-<sup>14</sup>C -2-deoxy-D-glucose. Glycogen was isolated by  
1051 ethanol precipitation from 30% KOH tissue lysates, as described<sup>81</sup>. Insulin level in plasma at T0  
1052 and T140 were measured using a Stellux ELISA rodent insulin kit (Alpco).

1053

#### 1054 **Protein purification and nanodisc formation**

1055 SWELL1 was purified as described previously<sup>30</sup>. Freshly purified SWELL1 from gel filtration in  
1056 Buffer 1 (20 mM HEPES, 150 mM KCl, 1 mM EDTA, 0.025% DDM, pH 7.4) was reconstituted into  
1057 MSP1E3D1 with a lipid mix (2:1:1 weight ratio of DOPE:POPC:POPS lipids (Avanti, Alabaster,  
1058 Alabama)) at a final molar ratio of 1:2.5:200 (Monomer Ratio: SWELL1, MSP1E3D1, Lipid Mix).  
1059 First, solubilized lipid in Column Buffer (20 mM HEPES, 150 mM KCl, 1 mM EDTA pH 7.4) was  
1060 mixed with additional DDM detergent, Column Buffer, and SWELL1. This solution was mixed at  
1061 4°C for 30 min before addition of purified MSP1E3D1. This addition brought the final  
1062 concentrations to approximately 10 μM SWELL1, 25 μM MSP1E3D1, 2 mM lipid mix, and 3.3 mM  
1063 DDM in Column Buffer (1 mL reaction). The solution with MSP1E3D1 was mixed at 4°C for 10  
1064 min before addition of 130 mg of Biobeads SM2 (Bio-Rad, Hercules, CA). Biobeads (washed into  
1065 methanol, water, and then Column Buffer) were weighed with liquid removed by P1000 tip (Damp  
1066 weight). This mix was incubated at 4°C for 30 min before addition of another 130 mg of Biobeads  
1067 (final 260 mg of Biobeads per mL). This final mixture was then mixed at 4°C overnight (~14 hr).  
1068 Supernatant was cleared of beads by letting large beads settle and carefully removing  
1069 supernatant with a pipet. Sample was spun for 5 min at 21,000 x g before loading onto a Superose  
1070 6 column in Column Buffer without EDTA. Peak fractions corresponding to SWELL1 in  
1071 MSP1E3D1 were collected, 100 kDa cutoff spin concentrated, and then re-run on the Superose  
1072 6. The fractions corresponding to the center of the peak were then pooled and concentrated prior  
1073 to grid preparation.

1074

1075 **Grid preparation**

1076 SN-407 in DMSO (Stock 10 mM) was added to SWELL1-Msp1E3D1 sample to give a final  
1077 concentration of 1 mg/mL SWELL1-MSP1E3D1 and 100  $\mu$ M SN-407. The drug was allowed to  
1078 equilibrate and bind complex on ice for  $\sim$ 1 hour prior to freezing grids. Sample with drug was  
1079 cleared by a 5 min 21,000 x g spin prior to grid making. For freezing grids, a 2  $\mu$ l drop of protein  
1080 was applied to freshly glow discharged Holey Carbon, 300 mesh R 1.2/1.3 gold grids (Quantifoil,  
1081 Großlöbichau, Germany). A Vitrobot Mark IV (Thermo Fisher Scientific, Waltham, MA) was  
1082 utilized with 22°C, 100% humidity, one blot force, and a 3 s blot time, before plunge freezing in  
1083 liquid ethane. Grids were then clipped in autoloader cartridges for collection.

1084

1085 **Data collection**

1086 SWELL1-MSP1E3D1 with SN-407 grids were transferred to a Talos Arctica cryo-electron  
1087 microscope (Thermo Fisher Scientific) operated at an acceleration voltage of 200 kV. Images  
1088 were recorded in an automated fashion with SerialEM<sup>82</sup> using image shift with a target defocus  
1089 range of  $-0.7 \sim -2.2 \mu$ m over 5.493 s as 50 subframes with a K3 direct electron detector (Gatan,  
1090 Pleasanton, CA) in super-resolution mode with a super-resolution pixel size of  $0.5685 \text{ \AA}^{83}$ . The  
1091 electron dose was  $9.392 \text{ e}^- / \text{ \AA} / \text{ s}$  ( $1.0318 \text{ e}^- / \text{ \AA}^2/\text{frame}$ ) at the detector level and total accumulated  
1092 dose was  $51.59 \text{ e}^-/\text{ \AA}^2$ .

1093

1094 **Cryo-EM data processing**

1095 A total of 3576 movie stacks were collected, motion-corrected and binned to  $1.137 \text{ \AA}/\text{pixel}$  using  
1096 MotionCor2 in RELION3.1<sup>84</sup>, and CTF-corrected using Ctfind 4.1.13<sup>85</sup> (See [Supplemental Fig.](#)  
1097 [7](#)). Micrographs with a Ctfind reported resolution estimate worse than  $5 \text{ \AA}$  were discarded. A  
1098 particle set generated from manual picking and template-based autopicking in RELION3.1 was  
1099 cleaned and processed to 60,803 particles representing diverse views of the SWELL1 particle.  
1100 These particles were then used to train Topaz<sup>86</sup> to pick a set of 936,282 particles. This set was

1101 cleaned with 2D classification and heterogeneous refinement in cryoSPARCv2. We then  
1102 generated a refinement in cryoSPARCv2 and then RELION3.1 using C6 symmetry and utilized  
1103 this map to perform Bayesian Polishing. Polished particles were then refined in RELION3.1 with  
1104 C6 symmetry with a mask for the extracellular domain (ECD), transmembrane, and linker domains  
1105 of SWELL1 to 3.05 Å. This map did not show clear evidence of drug density in the ECD, which  
1106 we hypothesized could be due to a combination of partial drug occupancy and asymmetric drug  
1107 density (off the symmetry axis of SWELL1). To test this hypothesis we performed symmetry  
1108 expansion (in C6) followed by sequential 3D classification with C1 symmetry in RELION3.1 using  
1109 an increasingly tightened mask on the ECD. We noted and selected classes with putative drug  
1110 density in the ECD. We then used C1 refinement with C6 symmetry relaxation<sup>48</sup> in RELION3.1 to  
1111 further refine the density. These refinement angles were used for one additional 3D classification  
1112 job to generate 2 classes: one with vertical density (85,831 particles) and one with tilted density  
1113 (78,324 particles). The particles in each of these classes were then refined an additional time with  
1114 symmetry relaxation and local angular sampling. Finally, these angles were used in a refinement  
1115 in C1 with masking for the ECD, transmembrane, and linker domain to generate the final maps.

1116

### 1117 **Modeling and refinement**

1118 Maps from refinement for the vertical and tilted drug density were used for modeling in Coot<sup>87</sup>.  
1119 First, the model from <sup>30</sup>(PDB: 6NZW) was docked in the map density. As the lipid mix used in this  
1120 study contained a majority of DOPE lipid, the lipid acyl chains between LRRC8A subunits were  
1121 modeled as DOPE. The model and restraints for Smo7 were generated using Phenix.elbow<sup>88</sup>  
1122 and then SN-407 was placed and refined in the putative drug density for each map. Real space  
1123 refinement of each model was carried out using Phenix.real\_space\_refine. Molprobit<sup>89</sup> was used  
1124 to evaluate the stereochemistry and geometry of the structure for subsequent rounds of manual  
1125 adjustment in Coot and refinement in Phenix. Phenix.mtriage was then used map and model

1126 validation. Figures were prepared using Chimera<sup>90</sup>, ChimeraX<sup>91</sup>, Prism, and Adobe Photoshop  
1127 and Illustrator software.

1128

### 1129 **Quantitative RT-PCR**

1130 3T3-F442A preadipocytes cells treated with either vehicle (DMSO) or 10  $\mu$ M SN-401 for 96 h were  
1131 solubilized in TRIzol and the total RNA was isolated using PureLink RNA kit (Life Technologies).  
1132 For differentiated adipocytes, vehicle or 10  $\mu$ M SN-401 were added during 7-11 days of  
1133 differentiation for 96 h and then serum starved (+ DMSO/SN-401) for 6 h and stimulated with 0  
1134 and 10 nM insulin/serum containing media (+ DMSO or SN-40X) for 15 min and processed for  
1135 RNA as described above. The cDNA synthesis, qRT-PCR reaction and quantification were carried  
1136 out as described previously<sup>24</sup>.

1137

### 1138 **Liver isolation, triglycerides and histology**

1139 HFD mice treated with either vehicle or SN-401 were anesthetized with 1-4% isoflurane followed  
1140 by cervical dislocation. Gross liver weights were measured and identical sections from right  
1141 medial lobe of liver were dissected for further examinations. Total triglyceride content was  
1142 determined by homogenizing 10-50 mg of tissue in 1.5 ml of chloroform:methanol (2:1 v/v) and  
1143 centrifuged at 12000 rpm for 10 mins at 4°C. An aliquot, 20  $\mu$ l, was evaporated in a 1.5 ml  
1144 microcentrifuge tube for 30 mins. Triglyceride content was determined by adding 100  $\mu$ l of Infinity  
1145 Triglyceride Reagent (Fisher Scientific) to the dried sample followed by 30 min incubation at RT.  
1146 The samples were then transferred to a 96 well plate along with standards (0-2000 mg/dl) and  
1147 absorbance was measured at 540 nm and the final concentration was determined by normalizing  
1148 to tissue weight. For histological examination, liver sections were fixed in 10% zinc formalin and  
1149 paraffin embedded for sectioning. Hematoxylin and eosin (H&E) stained sections were then  
1150 assessed for steatosis grade, lobular inflammation and hepatocyte ballooning for non-alcoholic  
1151 fatty liver disease (NAFLD) scoring as described<sup>46,92,93</sup>.

1152 **Quantification and statistical analysis**

1153 Standard unpaired or paired two-tailed Student's t-test were performed while comparing two  
1154 groups. One-way Anova was used for multiple group comparison. For GTTs and ITTs, 2-way  
1155 analysis of variance (Anova) was used. The threshold for significance was 0.05 for all statistical  
1156 comparisons. \*, \*\* and \*\*\* represent *p*-values of <0.05, <0.01 and <0.001, respectively. All data  
1157 are presented as mean ±SEM. Details of statistical analyses are presented in the figure legends.

1158

1159 **Acknowledgements**

1160 We thank R. Sigmund, J. Galbraith and M. Knudson of the University of Iowa Tissue  
1161 procurement Core facility (TPC) for services provided related to acquisition of human adipose  
1162 specimens (NCI award number P30CA086862). We thank the Diabetes Research Core at the  
1163 Washington University in St. Louis for triglyceride estimation DRC (NIH P30 DK 020579). We  
1164 also thank the Fraternal Order of Eagles Diabetes Research Center at the University of Iowa in  
1165 performing euglycemic hyperinsulinemic clamps, Aloysius Klingelhutz (University of Iowa) for  
1166 human adipose tissue transport and Michael Wright (University of Iowa) for gifting HEK-293  
1167 cells. P.R.C. and C.A.K. acknowledge support of predoctoral fellowships from the University of  
1168 Iowa Center for Biocatalysis and Bioprocessing affiliated with the NIH-sponsored Predoctoral  
1169 Training Program in Biotechnology (T32 GM008365). This work was supported by the John L. &  
1170 Carol E. Lach Chair in Drug Delivery Technology (RJK), and by grants from the NIH NIDDK  
1171 1R01DK106009 (R.S.), R01DK115791 (A.W.N.) and the Roy J. Carver Trust (R.S.).

1172

1173 **Author Contributions**

1174 Conceptualization, R.S.; methodology, S.K.G., L.X., C.K, A.K., P.C., D.M.K., E.E.G., C.A.K.,  
1175 W.J.G., R.D.S, E.B.T., C.M.T, S.G.B., Y.Z., R.S.; formal analysis, R.S., S.K.G., L.X., C.K.,  
1176 D.M.K, E.E.G., R.D.S., S.G.B., W.J.G., C.M.T., D.J.L.; investigation, R.S., S.K.G., L.X., C.K.,  
1177 P.C., R.K., W.J.G., C.M.T.; resources, J.K.S., I.S., P.N., Y.I., R.K. R. S.; writing (original draft),

1178 R.S., writing (review and editing), R.S., S.K.G., A.W.N., Y.I., D.M.K., S.G.B., W.J.G., L.X., P.C.,  
1179 R.K., D.J.L.; visualization, R.S., S.K.G., L.X., D.M.K., P.C., C.K.; supervision, R.S., A.W.N.,  
1180 S.G.B., Y.I., R.K.; funding acquisition, R.K., R.S.

1181

#### 1182 **Data availability**

1183 All requests for resources and reagents should be addressed to [rajan.sah@wustl.edu](mailto:rajan.sah@wustl.edu) and will  
1184 be fulfilled upon reasonable request.

1185

#### 1186 **Competing financial interests**

1187 R.S. is co-founder of Senseion Therapeutics, Inc., a start-up company developing SWELL1  
1188 modulators for human disease. D.J.L. is co-Founder and CEO of Senseion Therapeutics, Inc.

1189

1190

1191

1192

1193

1194

1195

1196

1197

1198

1199

1200

1201

1202

1203

1204 **References**

- 1205
- 1206 1. Ashcroft, F.M. & Rorsman, P. Diabetes mellitus and the beta cell: the last ten years. *Cell*
- 1207 **148**, 1160-1171 (2012).
- 1208 2. Rorsman, P. & Braun, M. Regulation of insulin secretion in human pancreatic islets.
- 1209 *Annu Rev Physiol* **75**, 155-179 (2013).
- 1210 3. Del Guerra, S., *et al.* Functional and molecular defects of pancreatic islets in human type
- 1211 2 diabetes. *Diabetes* **54**, 727-735 (2005).
- 1212 4. Report, C.f.D.C.a.P.N.D.S. National Diabetes Statistics Report, 2017
- 1213 . (Centers for Disease Control and Prevention, U.S. Dept of Health and Human Services,
- 1214 Atlanta, GA:, 2017).
- 1215 5. The Emerging Risk Factors, C. Diabetes mellitus, fasting blood glucose concentration,
- 1216 and risk of vascular disease: a collaborative meta-analysis of 102 prospective studies.
- 1217 *The Lancet* **375**, 2215-2222 (2010).
- 1218 6. Benjamin, E.J., *et al.* Heart Disease and Stroke Statistics-2019 Update: A Report From
- 1219 the American Heart Association. *Circulation* **139**, e56-e528 (2019).
- 1220 7. Association, A.D. Economic Costs of Diabetes in the U.S. in 2017. *Diabetes Care* **41**,
- 1221 917-928 (2018).
- 1222 8. The Emerging Risk Factors, C. Diabetes Mellitus, Fasting Glucose, and Risk of Cause-
- 1223 Specific Death. *New England Journal of Medicine* **364**, 829-841 (2011).
- 1224 9. Raghavan, S., *et al.* Diabetes Mellitus-Related All-Cause and Cardiovascular Mortality in
- 1225 a National Cohort of Adults. *J Am Heart Assoc* **8**, e011295 (2019).
- 1226 10. Zelniker, T.A., *et al.* Comparison of the Effects of Glucagon-Like Peptide Receptor
- 1227 Agonists and Sodium-Glucose Cotransporter 2 Inhibitors for Prevention of Major
- 1228 Adverse Cardiovascular and Renal Outcomes in Type 2 Diabetes Mellitus. *Circulation*
- 1229 **139**, 2022-2031 (2019).
- 1230 11. Handelsman, Y., *et al.* American Association of Clinical Endocrinologists and American
- 1231 College of Endocrinology--Clinical Practice Guidelines for Developing a Diabetes
- 1232 Mellitus Comprehensive Care Plan--2015--Executive Summary. *Endocr Pract* **21**, 413-
- 1233 437 (2015).
- 1234 12. Davies, M.J., *et al.* Management of Hyperglycemia in Type 2 Diabetes, 2018. A
- 1235 Consensus Report by the American Diabetes Association (ADA) and the European
- 1236 Association for the Study of Diabetes (EASD). *Diabetes Care* **41**, 2669-2701 (2018).
- 1237 13. Styles, E., Kidney, R.S.M., Carlin, C. & Peterson, K. Diabetes Treatment, Control, and
- 1238 Hospitalization Among Adults Aged 18 to 44 in Minnesota, 2013-2015. *Prev Chronic Dis*
- 1239 **15**, E142 (2018).
- 1240 14. Qaseem, A., *et al.* Hemoglobin A1c Targets for Glycemic Control With Pharmacologic
- 1241 Therapy for Nonpregnant Adults With Type 2 Diabetes Mellitus: A Guidance Statement
- 1242 Update From the American College of PhysiciansACP Guidance Statement on HbA1c
- 1243 Targets With Pharmacologic Therapy. *Annals of Internal Medicine* **168**, 569-576 (2018).
- 1244 15. Edridge, C.L., *et al.* Prevalence and Incidence of Hypoglycaemia in 532,542 People with
- 1245 Type 2 Diabetes on Oral Therapies and Insulin: A Systematic Review and Meta-Analysis
- 1246 of Population Based Studies. *PLoS One* **10**, e0126427 (2015).
- 1247 16. Khunti, K., *et al.* Rates and predictors of hypoglycaemia in 27 585 people from 24
- 1248 countries with insulin-treated type 1 and type 2 diabetes: the global HAT study.
- 1249 *Diabetes, Obesity and Metabolism* **18**, 907-915 (2016).
- 1250 17. Mittermayer, F., *et al.* Addressing unmet medical needs in type 2 diabetes: a narrative
- 1251 review of drugs under development. *Curr Diabetes Rev* **11**, 17-31 (2015).
- 1252 18. Sawada, A., *et al.* A congenital mutation of the novel gene LRRC8 causes
- 1253 agammaglobulinemia in humans. *J Clin Invest* **112**, 1707-1713 (2003).



- 1254 19. Kubota, K., *et al.* LRRC8 involved in B cell development belongs to a novel family of  
1255 leucine-rich repeat proteins. *FEBS Lett* **564**, 147-152 (2004).
- 1256 20. Kumar, L., *et al.* Leucine-rich repeat containing 8A (LRRC8A) is essential for T  
1257 lymphocyte development and function. *J Exp Med* **211**, 929-942 (2014).
- 1258 21. Qiu, Z., *et al.* SWELL1, a Plasma Membrane Protein, Is an Essential Component of  
1259 Volume-Regulated Anion Channel. *Cell* **157**, 447-458 (2014).
- 1260 22. Voss, F.K., *et al.* Identification of LRRC8 heteromers as an essential component of the  
1261 volume-regulated anion channel VRAC. *Science* **344**, 634-638 (2014).
- 1262 23. Syeda, R., *et al.* LRRC8 Proteins Form Volume-Regulated Anion Channels that Sense  
1263 Ionic Strength. *Cell* **164**, 499-511 (2016).
- 1264 24. Zhang, Y., *et al.* SWELL1 is a regulator of adipocyte size, insulin signalling and glucose  
1265 homeostasis. *Nature cell biology* **19**, 504-517 (2017).
- 1266 25. Gunasekar, S.K., Xie, L. & Sah, R. SWELL signalling in adipocytes: can fat 'feel' fat?  
1267 *Adipocyte* **8**, 223-228 (2019).
- 1268 26. Kumar, A., *et al.* SWELL1 regulates skeletal muscle cell size, intracellular signaling,  
1269 adiposity and glucose metabolism. *eLife* **9**(2020).
- 1270 27. Kang, C., *et al.* SWELL1 is a glucose sensor regulating beta-cell excitability and  
1271 systemic glycaemia. *Nat Commun* **9**, 367 (2018).
- 1272 28. Stuhlmann, T., Planells-Cases, R. & Jentsch, T.J. LRRC8/VRAC anion channels  
1273 enhance beta-cell glucose sensing and insulin secretion. *Nat Commun* **9**, 1974 (2018).
- 1274 29. Xie, L., *et al.* Induction of adipose and hepatic SWELL1 expression is required for  
1275 maintaining systemic insulin-sensitivity in obesity. *Channels*, 0 (2017).
- 1276 30. Kern, D.M., Oh, S., Hite, R.K. & Brohawn, S.G. Cryo-EM structures of the DCPIB-  
1277 inhibited volume-regulated anion channel LRRC8A in lipid nanodiscs. *eLife* **8**(2019).
- 1278 31. Decher, N., *et al.* DCPIB is a novel selective blocker of I(Cl,swell) and prevents swelling-  
1279 induced shortening of guinea-pig atrial action potential duration. *Br J Pharmacol* **134**,  
1280 1467-1479 (2001).
- 1281 32. Inoue, H., Takahashi, N., Okada, Y. & Konishi, M. Volume-sensitive outwardly rectifying  
1282 chloride channel in white adipocytes from normal and diabetic mice. *Am J Physiol Cell*  
1283 *Physiol* **298**, C900-909 (2010).
- 1284 33. deSolms, S.J., Woltersdorf, O.W., Jr., Cragoe, E.J., Jr., Watson, L.S. & Fanelli, G.M., Jr.  
1285 (Acylaryloxy)acetic acid diuretics. 2. (2-Alkyl-2-aryl-1-oxo-5-indanyloxy)acetic acids. *J*  
1286 *Med Chem* **21**, 437-443 (1978).
- 1287 34. Woltersdorf, O.W., Jr., deSolms, S.J., Schultz, E.M. & Cragoe, E.J., Jr.  
1288 (Acylaryloxy)acetic acid diuretics. 1. (2-Alkyl- and 2,2-dialkyl-1-oxo-5-indanyloxy)acetic  
1289 acids. *J Med Chem* **20**, 1400-1408 (1977).
- 1290 35. Cragoe, E.J., Jr., *et al.* Agents for the treatment of brain injury. 1. (Aryloxy)alkanoic  
1291 acids. *J Med Chem* **25**, 567-579 (1982).
- 1292 36. Cragoe, E.J.J. & Woltersdorf, O.W., Jr. . 4-[(6,7-Dihalo-2,3-dihydro-1-oxo-1H-inden-5-yl)-  
1293 oxy]butanoic acid compounds and a pharmaceutical composition containing them *Eur.*  
1294 *Pat. Appl. (1982), EP 47011 A1 19820310* (1982).
- 1295 37. Cragoe, E.J., Jr. Drugs for the treatment of traumatic brain injury. *Med Res Rev* **7**, 271-  
1296 305 (1987).
- 1297 38. Deneka, D., Sawicka, M., Lam, A.K.M., Paulino, C. & Dutzler, R. Structure of a volume-  
1298 regulated anion channel of the LRRC8 family. *Nature* (2018).
- 1299 39. Kefauver, J.M., *et al.* Structure of the human volume regulated anion channel. *eLife*  
1300 **7**(2018).
- 1301 40. Kasuya, G., *et al.* Cryo-EM structures of the human volume-regulated anion channel  
1302 LRRC8. *Nat Struct Mol Biol* **25**, 797-804 (2018).



- 1303 41. Alghanem, A., *et al.* SWELL1-LRRC8 complex regulates endothelial AKT-eNOS-mTOR  
1304 signaling and vascular function. *BioRxiv (under revision with eLife)* doi:  
1305 [https://doi.org/10.1101/2020.08.04.236182\(2020\)](https://doi.org/10.1101/2020.08.04.236182(2020)).
- 1306 42. Gastaldelli, A., *et al.* The effect of rosiglitazone on the liver: decreased gluconeogenesis  
1307 in patients with type 2 diabetes. *J Clin Endocrinol Metab* **91**, 806-812 (2006).
- 1308 43. Friedman, S.L., Neuschwander-Tetri, B.A., Rinella, M. & Sanyal, A.J. Mechanisms of  
1309 NAFLD development and therapeutic strategies. *Nat Med* **24**, 908-922 (2018).
- 1310 44. Younossi, Z.M., *et al.* The global epidemiology of NAFLD and NASH in patients with type  
1311 2 diabetes: A systematic review and meta-analysis. *J Hepatol* **71**, 793-801 (2019).
- 1312 45. Younossi, Z.M., *et al.* Global epidemiology of nonalcoholic fatty liver disease-Meta-  
1313 analytic assessment of prevalence, incidence, and outcomes. *Hepatology* **64**, 73-84  
1314 (2016).
- 1315 46. Kleiner, D.E., *et al.* Design and validation of a histological scoring system for  
1316 nonalcoholic fatty liver disease. *Hepatology* **41**, 1313-1321 (2005).
- 1317 47. Van Wagner, L.B. & Rinella, M.E. The role of insulin-sensitizing agents in the treatment  
1318 of nonalcoholic steatohepatitis. *Therap Adv Gastroenterol* **4**, 249-263 (2011).
- 1319 48. Abrishami, V., *et al.* Localized reconstruction in Scipion expedites the analysis of  
1320 symmetry mismatches in cryo-EM data. *Prog Biophys Mol Biol* (2020).
- 1321 49. Buchner, J. Molecular chaperones and protein quality control: an introduction to the JBC  
1322 Reviews thematic series. *J Biol Chem* **294**, 2074-2075 (2019).
- 1323 50. Pipalia, N.H., *et al.* Histone deacetylase inhibitor treatment dramatically reduces  
1324 cholesterol accumulation in Niemann-Pick type C1 mutant human fibroblasts. *Proc Natl*  
1325 *Acad Sci U S A* **108**, 5620-5625 (2011).
- 1326 51. Pipalia, N.H., *et al.* Histone deacetylase inhibitors correct the cholesterol storage defect  
1327 in most Niemann-Pick C1 mutant cells. *J Lipid Res* **58**, 695-708 (2017).
- 1328 52. Loo, T.W., Bartlett, M.C. & Clarke, D.M. Correctors promote folding of the CFTR in the  
1329 endoplasmic reticulum. *Biochem J* **413**, 29-36 (2008).
- 1330 53. Pedemonte, N. & Galletta, L.J. Pharmacological Correctors of Mutant CFTR  
1331 Mistrafficking. *Front Pharmacol* **3**, 175 (2012).
- 1332 54. Matthews, D.R., *et al.* Homeostasis model assessment: insulin resistance and beta-cell  
1333 function from fasting plasma glucose and insulin concentrations in man. *Diabetologia* **28**,  
1334 412-419 (1985).
- 1335 55. Osei-Owusu, J., Yang, J., Vitery, M.D.C. & Qiu, Z. Molecular Biology and Physiology of  
1336 Volume-Regulated Anion Channel (VRAC). *Curr Top Membr* **81**, 177-203 (2018).
- 1337 56. Taneera, J., *et al.* A systems genetics approach identifies genes and pathways for type 2  
1338 diabetes in human islets. *Cell metabolism* **16**, 122-134 (2012).
- 1339 57. Back, S.H., Kang, S.W., Han, J. & Chung, H.T. Endoplasmic reticulum stress in the beta-  
1340 cell pathogenesis of type 2 diabetes. *Exp Diabetes Res* **2012**, 618396 (2012).
- 1341 58. Back, S.H. & Kaufman, R.J. Endoplasmic reticulum stress and type 2 diabetes. *Annu*  
1342 *Rev Biochem* **81**, 767-793 (2012).
- 1343 59. Cnop, M., Foufelle, F. & Velloso, L.A. Endoplasmic reticulum stress, obesity and  
1344 diabetes. *Trends Mol Med* **18**, 59-68 (2012).
- 1345 60. Chen, P.C., *et al.* Carbamazepine as a novel small molecule corrector of trafficking-  
1346 impaired ATP-sensitive potassium channels identified in congenital hyperinsulinism. *J*  
1347 *Biol Chem* **288**, 20942-20954 (2013).
- 1348 61. Martin, G.M., *et al.* Pharmacological Correction of Trafficking Defects in ATP-sensitive  
1349 Potassium Channels Caused by Sulfonylurea Receptor 1 Mutations. *J Biol Chem* **291**,  
1350 21971-21983 (2016).
- 1351 62. Pratt, E.B., Yan, F.F., Gay, J.W., Stanley, C.A. & Shyng, S.L. Sulfonylurea receptor 1  
1352 mutations that cause opposite insulin secretion defects with chemical chaperone  
1353 exposure. *J Biol Chem* **284**, 7951-7959 (2009).

- 1354 63. Davies, J.C., *et al.* VX-659-Tezacaftor-Ivacaftor in Patients with Cystic Fibrosis and One  
1355 or Two Phe508del Alleles. *The New England journal of medicine* **379**, 1599-1611 (2018).
- 1356 64. Middleton, P.G., *et al.* Elexacaftor-Tezacaftor-Ivacaftor for Cystic Fibrosis with a Single  
1357 Phe508del Allele. *The New England journal of medicine* **381**, 1809-1819 (2019).
- 1358 65. Canella, R., *et al.* Involvement of the TREK-1 channel in human alveolar cell membrane  
1359 potential and its regulation by inhibitors of the chloride current. *J Cell Physiol* **234**,  
1360 17704-17713 (2019).
- 1361 66. Afzal, A., *et al.* The LRRC8 volume-regulated anion channel inhibitor, DCPIB, inhibits  
1362 mitochondrial respiration independently of the channel. *Physiological Reports* **7**, e14303  
1363 (2019).
- 1364 67. Bowens, N.H., Dohare, P., Kuo, Y.-H. & Mongin, A.A. DCPIB, the proposed selective  
1365 blocker of volume-regulated anion channels, inhibits several glutamate transport  
1366 pathways in glial cells. *Molecular pharmacology* **83**, 22-32 (2013).
- 1367 68. Minieri, L., *et al.* The inhibitor of volume-regulated anion channels DCPIB activates  
1368 TREK potassium channels in cultured astrocytes. *Br J Pharmacol* **168**, 1240-1254  
1369 (2013).
- 1370 69. Fujii, T., *et al.* Inhibition of gastric H<sup>+</sup>,K<sup>+</sup>-ATPase by 4-(2-butyl-6,7-dichloro-2-  
1371 cyclopentylindan-1-on-5-yl)oxybutyric acid (DCPIB), an inhibitor of volume-regulated  
1372 anion channel. *Eur J Pharmacol* **765**, 34-41 (2015).
- 1373 70. Deng, W., Mahajan, R., Baumgarten, C.M. & Logothetis, D.E. The ICl<sub>swell</sub> inhibitor  
1374 DCPIB blocks Kir channels that possess weak affinity for PIP<sub>2</sub>. *Pflugers Arch* **468**, 817-  
1375 824 (2016).
- 1376 71. Furtado, R.H.M., *et al.* Dapagliflozin and Cardiovascular Outcomes in Patients With  
1377 Type 2 Diabetes Mellitus and Previous Myocardial Infarction. *Circulation* **139**, 2516-2527  
1378 (2019).
- 1379 72. Kato, E.T., *et al.* Effect of Dapagliflozin on Heart Failure and Mortality in Type 2 Diabetes  
1380 Mellitus. *Circulation* **139**, 2528-2536 (2019).
- 1381 73. Wiviott, S.D., *et al.* Dapagliflozin and Cardiovascular Outcomes in Type 2 Diabetes. *The*  
1382 *New England journal of medicine* **380**, 347-357 (2019).
- 1383 74. Mahaffey, K.W., *et al.* Canagliflozin for Primary and Secondary Prevention of  
1384 Cardiovascular Events: Results From the CANVAS Program (Canagliflozin  
1385 Cardiovascular Assessment Study). *Circulation* **137**, 323-334 (2018).
- 1386 75. Neal, B., *et al.* Canagliflozin and Cardiovascular and Renal Events in Type 2 Diabetes.  
1387 *The New England journal of medicine* **377**, 644-657 (2017).
- 1388 76. Zinman, B., *et al.* Empagliflozin, Cardiovascular Outcomes, and Mortality in Type 2  
1389 Diabetes. *The New England journal of medicine* **373**, 2117-2128 (2015).
- 1390 77. Busch, A.K., Cordery, D., Denyer, G.S. & Biden, T.J. Expression profiling of palmitate-  
1391 and oleate-regulated genes provides novel insights into the effects of chronic lipid  
1392 exposure on pancreatic beta-cell function. *Diabetes* **51**, 977-987 (2002).
- 1393 78. Koh, W., Stratman, A.N., Sacharidou, A. & Davis, G.E. In vitro three dimensional  
1394 collagen matrix models of endothelial lumen formation during vasculogenesis and  
1395 angiogenesis. *Methods Enzymol* **443**, 83-101 (2008).
- 1396 79. Ayala, J.E., *et al.* Hyperinsulinemic-euglycemic clamps in conscious, unrestrained mice.  
1397 *Journal of visualized experiments : JoVE* (2011).
- 1398 80. Kim, J.K., *et al.* Redistribution of substrates to adipose tissue promotes obesity in mice  
1399 with selective insulin resistance in muscle. *J Clin Invest* **105**, 1791-1797 (2000).
- 1400 81. Shiota, M. Measurement of Glucose Homeostasis In Vivo: Combination of Tracers and  
1401 Clamp Techniques. in *Animal Models in Diabetes Research* (eds. Joost, H.-G., Al-  
1402 Hasani, H. & Schürmann, A.) 229-253 (Humana Press, Totowa, NJ, 2012).
- 1403 82. Mastronarde, D.N. Automated electron microscope tomography using robust prediction  
1404 of specimen movements. *J Struct Biol* **152**, 36-51 (2005).

- 1405 83. Marcoux, A.A., *et al.* Molecular features and physiological roles of K(+)-Cl(-)  
1406 cotransporter 4 (KCC4). *Biochim Biophys Acta Gen Subj* **1861**, 3154-3166 (2017).  
1407 84. Zheng, S.Q., *et al.* MotionCor2: anisotropic correction of beam-induced motion for  
1408 improved cryo-electron microscopy. *Nature methods* **14**, 331-332 (2017).  
1409 85. Rohou, A. & Grigorieff, N. CTFIND4: Fast and accurate defocus estimation from  
1410 electron micrographs. *J Struct Biol* **192**, 216-221 (2015).  
1411 86. Bepler, T. & Berger, B. *Learning protein sequence embeddings using information from*  
1412 *structure*, (2019).  
1413 87. Emsley, P., Lohkamp, B., Scott, W.G. & Cowtan, K. Features and development of Coot.  
1414 *Acta Crystallogr D Biol Crystallogr* **66**, 486-501 (2010).  
1415 88. Liebschner, D., *et al.* Macromolecular structure determination using X-rays, neutrons  
1416 and electrons: recent developments in Phenix. *Acta Crystallogr D Struct Biol* **75**, 861-  
1417 877 (2019).  
1418 89. Williams, C.J., *et al.* MolProbity: More and better reference data for improved all-atom  
1419 structure validation. *Protein Sci* **27**, 293-315 (2018).  
1420 90. Pettersen, E.F., *et al.* UCSF Chimera--a visualization system for exploratory research  
1421 and analysis. *J Comput Chem* **25**, 1605-1612 (2004).  
1422 91. Goddard, T.D., *et al.* UCSF ChimeraX: Meeting modern challenges in visualization and  
1423 analysis. *Protein Sci* **27**, 14-25 (2018).  
1424 92. Rauckhorst, A.J., *et al.* The mitochondrial pyruvate carrier mediates high fat diet-induced  
1425 increases in hepatic TCA cycle capacity. *Mol Metab* **6**, 1468-1479 (2017).  
1426 93. Liang, W., *et al.* Establishment of a general NAFLD scoring system for rodent models  
1427 and comparison to human liver pathology. *PLoS One* **9**, e115922 (2014).  
1428

1429

1430

1431

1432

1433

1434

1435

1436

1437

1438

1439

1440

1441

1442 **Figure Legends**

1443

1444

1445 **Figure 1.  $I_{CI,SWELL}$  and SWELL1 protein are reduced in T2D  $\beta$ -cells and adipocytes.**

1446 **a-b.** Current-voltage plots of  $I_{CI,SWELL}$  measured in non-T2D and T2D mouse (**a**) and human (**b**)

1447  $\beta$ -cells at baseline (iso, black trace) and; with hypotonic (210 mOsm) stimulation (hypo, red

1448 trace). **c-d.** Mean outward  $I_{CI,SWELL}$  current densities at +100 mV from non-T2D (n = 11 cells) and

1449 T2D (n = 6 cells) mouse (**c**) and non-T2D (n = 6 cells) and T2D (n = 22 cells) human (**d**)  $\beta$ -cells.

1450 Symbol color represent cells recorded from different individual mice or humans. **e.** Western blot

1451 for SWELL1 protein isolated from cadaveric islets of non-T2D and T2D donors (n = 3 each), and

1452 densitometry quantification below. **f.** Mean outward  $I_{CI,SWELL}$  current densities at +100 mV from

1453 adipocytes isolated from epididymal fat of C57<sup>§</sup>, control strain KKA<sup>a§</sup> and polygenic-T2D KKA<sup>y§</sup>

1454 mice (n = 14-34 cells). **g.** Mean outward  $I_{CI,SWELL}$  current densities recorded at +100 mV from

1455 adipocytes isolated from visceral fat of lean<sup>#</sup> (n = 7 cells), obese non-T2D<sup>#</sup> (n = 13 cells) and

1456 T2D patients (n = 5 cells). **h.** Western blot for SWELL1 protein expression in epididymal adipose

1457 tissue isolated from polygenic-T2D KKA<sup>y</sup> mice compared to the parental control strain KKA<sup>a</sup>

1458 (n=3 each). **i.** Western blot comparing SWELL1 protein expression in visceral adipose tissue

1459 isolated from non-T2D and T2D patients. <sup>§</sup>Data for C57, KKA<sup>a</sup> and KKA<sup>y</sup> mouse adipocytes are

1460 replotted from previously reported data in Inoue, H et al. (2010) and the <sup>#</sup>lean and obese non-

1461 T2D adipocytes are replotted from our previously reported data in Zhang, Y et al. (2017) for

1462 purposes of comparison in **f** and **g**. Data are represented as Mean  $\pm$ SEM. Two-tailed unpaired t-

1463 test were used in **c-e**, **h** and **i**. Two-tailed permutation t-test group comparison for mouse

1464 adipocytes and one-way ANOVA for human adipocytes were used in **f** and **g** respectively. \*, \*\*

1465 and \*\*\* represent *p-values* of <0.05, <0.01 and <0.001, respectively.

1466

1467

1468 **Figure 2. SWELL1 protein expression regulates insulin-stimulated PI3K-AKT2-AS160**  
1469 **signaling. a-b.** Western blots detecting SWELL1, pAKT2, AKT2, pAS160, AS160 and  $\beta$ -actin in  
1470 wildtype (WT, black), SWELL1 knockout (KO, red) and adenoviral re-expression of SWELL1 in  
1471 KO (KO+SWELL1 O/E, blue) 3T3-F442A adipocytes stimulated with 0 and 10 nM insulin for 15  
1472 min (**a**) and the corresponding densitometric ratio for pAKT2/ $\beta$ -actin and pAS160/ $\beta$ -actin are  
1473 shown on the right (**b**) (n = 3 independent experiments for each condition). **c.** Mean inward and  
1474 outward current densities recorded at -100 and +100 mV from WT (black, n = 5 cells), KO (red,  
1475 n = 4 cells) and KO+SWELL1 O/E (blue, n = 4 cells) 3T3-F442A preadipocytes. **d.** SN-  
1476 401/DCPIB chemical structure. **e.**  $I_{Cl,SWELL}$  inward and outward current over time upon hypotonic  
1477 (210 mOsm) stimulation and subsequent inhibition by 10  $\mu$ M SN-401 in a HEK-293 cell. **f-g.**  
1478 Western blots detecting SWELL1, pAKT2 and  $\beta$ -actin in WT 3T3-F442A preadipocytes treated  
1479 with either vehicle or SN-401 (10  $\mu$ M) for 96 hours (**f**) (n=2 each) and the corresponding  
1480 densitometric ratio (**g**). **h.** Western blots detecting SWELL1 and  $\beta$ -actin in WT 3T3-F442A  
1481 adipocytes treated with either vehicle or SN-401 (10  $\mu$ M) for 96 hours (n=6 each) and the  
1482 corresponding densitometric ratio below. **i-j.** Western blots detecting pAKT2, AKT2, pAS160,  
1483 AS160 and  $\beta$ -actin in WT (n=9 each) and SWELL1 KO (n=3 each) 3T3-F442A adipocytes  
1484 treated with either vehicle or SN-401 (500 nM) for 96 hours and stimulated with 0 and 10 nM  
1485 insulin for 15 min (**i**) and the corresponding densitometric ratio for pAKT2/ $\beta$ -actin and pAS160/  
1486  $\beta$ -actin respectively (**j**). Data are represented as Mean  $\pm$ SEM. Two-tailed unpaired t-test was  
1487 used in **b, c, g** and **j** where \*, \*\* and \*\*\* represent *p-values* of <0.05, <0.01 and <0.001,  
1488 respectively. ns, difference did not exceed the threshold for significance.

1489

1490 **Figure 3. SN-401 increases SWELL1 and improves glycemic control in murine T2D**  
1491 **models by enhancing insulin sensitivity and secretion. a.** Western blots detecting SWELL1  
1492 protein in visceral fat of C57BL/6 mice on high-fat diet (HFD) for 21 weeks and treated with  
1493 either vehicle or SN-401 (5 mg/kg i.p., as in scheme Fig. 4e) and the corresponding



1494 densitometric ratios for SWELL1/ $\beta$ -actin (right) (n = 6 mice in each group). **b.** Western blots  
1495 comparing SWELL1 protein expression in inguinal adipose tissue of a polygenic-T2D KKA<sup>y</sup>  
1496 mouse treated with SN-401 (5 mg/kg i.p daily x 14 days) compared to untreated control KKA<sup>a</sup>  
1497 and wild-type C57BL/6 mice. **c.** Glucose tolerance test (GTT) and insulin tolerance test (ITT) of  
1498 C57BL/6 mice on HFD for 8 weeks treated with either vehicle or SN-401 (5 mg/kg i.p) for 10  
1499 days (n = 7 mice in each group). **d-f.** Fasting glucose levels (**d**), GTT (**e**) and ITT (**f**) of T2D  
1500 KKA<sup>y</sup> mice (n = 6) and its control strain KKA<sup>a</sup> (n = 3) compared pre- and post-SN-401 (5 mg/kg  
1501 i.p) treatment for 4 days, respectively. **g-h.** Fasting glucose levels (**g**) of regular chow-diet fed  
1502 (RC), lean mice treated with either vehicle or SN-401 (5 mg/kg i.p) for 6 days and the  
1503 corresponding GTT (**h**) (n = 6 in each group). **i-j.** Fasting glucose levels (**i**) and GTT (16 weeks  
1504 HFD, 4 days treatment) and ITT (18 weeks HFD, 4 days treatment) (**j**) of HFD-T2D mice treated  
1505 with either vehicle or SN-401 (5 mg/kg i.p). **k.** Relative insulin secretion in plasma of HFD-T2D  
1506 mice (18 weeks HFD, 4 days treatment) after i.p. glucose (0.75 g/kg BW) treated with either  
1507 vehicle (n = 3) or SN-401 (n = 4; 5 mg/kg i.p). **l-m.** Glucose stimulated insulin secretion (GSIS)  
1508 perfusion assay of islets isolated from HFD-T2D mouse (21 week time point) treated with either  
1509 vehicle (n = 3 mice, and 3 experimental replicates) or SN-401 (n = 3 mice, and 2 experimental  
1510 replicates, 5 mg/kg i.p) (**l**) and from polygenic-T2D KKA<sup>y</sup> mouse treated with either vehicle or  
1511 SN-401 (5 mg/kg i.p for 6 days, n = 3 mice in each group, 3 experimental replicates), (**m**); and  
1512 their corresponding area under the curve (AUC) comparisons, respectively, shown on the right.  
1513 Mean presented  $\pm$ SEM. Two-tailed unpaired t-test was used in in **a,g, i, l** and **m**. Paired t-test  
1514 was used in **d**. Paired (in group) and unpaired (between group) t-tests were performed in **k**.  
1515 Two-way ANOVA was used for **c, e, f, h** and **j** (p-value in bottom corner of graph). \*, \*\* and \*\*\*  
1516 represent *p-values of* <0.05, <0.01 and <0.001, respectively. ns, difference did not exceed the  
1517 threshold for significance.

1518

1519 **Figure 4. SN-401 improves systemic insulin sensitivity, tissue glucose uptake and**  
1520 **nonalcoholic fatty liver disease in murine T2D models. a.** Mean glucose-infusion rate during  
1521 euglycemic hyperinsulinemic clamps of polygenic T2D KKA<sup>y</sup> mice treated with vehicle (n = 7) or  
1522 SN-401 (n = 8) for 4 days (5 mg/kg i.p). **b.** Hepatic glucose production at baseline and during  
1523 euglycemic hyperinsulinemic clamp of T2D KKA<sup>y</sup> mice treated with vehicle or SN-401 (n = 9 in  
1524 each group) for 4 days (5 mg/kg i.p). **c.** Glucose uptake determined from 2-deoxyglucose (2-  
1525 DG) uptake in inguinal white adipose tissue (iWAT) and gonadal white adipose tissue (gWAT)  
1526 and heart during traced clamp of T2D KKA<sup>y</sup> mice treated with vehicle or SN-401 (n = 9 in each  
1527 group) for 4 days (5 mg/kg i.p). **d.** Glucose uptake into glycogen determined from 2-DG uptake  
1528 in liver (n = 9 for vehicle and n = 8 for SN-401), adipose (iWAT, n = 7 vehicle and n = 6 SN-401)  
1529 and gastrocnemius muscle (n = 7 vehicle and n = 6 SN-401) during clamp of T2D KKA<sup>y</sup> mice  
1530 treated with either Vehicle or SN-401 for 4 days (5 mg/kg i.p). **e.** Schematic representation of  
1531 treatment protocol of C57BL/6 mice injected with either vehicle or SN-401 (n = 6 in each group)  
1532 during HFD-feeding. **f.** Liver mass (left) and body weight (right) of HFD-T2D mice following  
1533 treatment with either vehicle or SN-401 (5 mg/kg i.p.) in **e.** **g-i.** Liver triglycerides (**g**; 6 mice in  
1534 each group), corresponding representative hematoxylin- and eosin-stained liver sections (**h**),  
1535 histologic scoring for steatosis, lobular inflammation, hepatocyte damage (ballooning) and  
1536 NAFLD-activity score (NAS; vehicle=5 and SN-401=6) with integrated scores for steatosis,  
1537 inflammation, and ballooning (**i**) of liver samples from **e.** Mean presented  $\pm$ SEM. Two-tailed  
1538 unpaired t-test in **a-d**, **f**, **g** and **i**. Statistical significance is denoted by \*, \*\* and \*\*\* representing  
1539  $p < 0.05$ ,  $p < 0.01$  and  $p < 0.001$ , respectively. Scale bar - 100  $\mu$ m.

1540

1541 **Figure 5. Structure Activity Relationship, molecular docking, and cryo-EM reveal specific**  
1542 **SN-401-SWELL1 interactions required for on-target activity. a.** Chemical structures of SN-  
1543 401, SN-403, SN-406, SN-407, Inactive 1 and Inactive 2. **b.**  $I_{Ci,SWELL}$  inward and outward current  
1544 over time upon hypotonic (210 mOsm) stimulation and subsequent inhibition with 7  $\mu$ M SN-

1545 401/SN-406 or 10  $\mu$ M Inactive 1&2 in HEK-293 cells. **c.** Mean of percentage of maximum  
1546 outward current blocked by SN-401 (n=6), SN-403 (n=3), SN-406 (n=4), Inactive 1 (n=3) and  
1547 Inactive 2 (n=3) at 10  $\mu$ M (top) and by SN-403 (n=3), SN-406 (n=5) and SN-407 (n=3) at 7  $\mu$ M  
1548 (bottom) in HEK-293 cells, respectively. **d.** top (i) and side (ii) view of binding poses of SN-401;  
1549 SN-401 carboxylate groups interacts with R103 residue guanidine groups (solid black circle),  
1550 the SN-401 cyclopentyl group occupies a shallow hydrophobic cleft at the interface of two  
1551 monomers formed by SWELL1 D102 and L101 (black broken circle)<sup>#</sup>. **e.** top (i) and side view (ii)  
1552 of best binding pose of SN-406; the carboxylate group interacts with R103 (black circle),  
1553 cyclopentyl group occupies the hydrophobic cleft (black broken circle) and the alkyl side chain of  
1554 SN-406 interacts with the alkyl side chain of R103 (purple broken circle)<sup>#</sup>. **f.** Cryo-EM images  
1555 revealing: Pose-1 (i), Pose-2 (ii) and overlay of Pose 1&2 (iii) views of selectivity filter with SN-  
1556 407 bound from the membrane plane (side view). The atomic model is represented as ribbons  
1557 and sticks within the cryo-EM density with three subunits removed in the side view for clarity.  
1558 Cryo-EM density is represented in transparent gray, nitrogens are colored blue, oxygens red,  
1559 chlorines green, protein carbons gray, and SN-407 carbons teal (Pose1) or orange (Pose-2).  
1560 <sup>#</sup>Poses generated for respective compounds by docking into PDB 6NZZ using Molecular  
1561 Operating Environment 2016 (MOE) software package. SN-401 and SN-406 are depicted as  
1562 yellow sticks and R103, D102 and L101 are depicted as green sticks in **d** and **e**. Mean  
1563 presented  $\pm$ SEM. Two-tailed unpaired t-test was used in **c**. \*, \*\*, and \*\*\* represent *p-values* of  
1564  $<0.05$ ,  $<0.01$  and  $<0.001$ , respectively.

1565

1566 **Figure 6. SN-401 and SWELL1-active congener SN-406 inhibit  $I_{Ci,SWELL}$  and promote**  
1567 **SWELL1 dependent signaling at sub-micromolar concentrations. a-d.** Representative  
1568  $I_{Ci,SWELL}$  inward and outward current traces over time recorded from HEK-293 cells preincubated  
1569 for 30 min with vehicle, SN-401, SN-406, Inactive 1 or Inactive 2 at concentrations of 1  $\mu$ M (**a**)  
1570 and vehicle, SN-401 and SN-406 at concentrations of 250 nM (**c**), and subsequently stimulated



1571 with hypotonic solution in the presence of the compound. Corresponding fold change in mean  
1572 outward  $I_{Cl,SWELL}$  current densities at +100 mV measured at the 7 minute time point after  
1573 hypotonic stimulation are shown in **b** and **d** respectively. **e-f**. Representative western blots  
1574 detecting SWELL1 and  $\beta$ -actin in 3T3-F442A adipocytes (**e**) and the corresponding mean  
1575 densitometric data (**f**) obtained from treatment with vehicle (n=8), SN-401 (n=10), SN-406 (n=6)  
1576 or Inactive 1 (n=3) at 10  $\mu$ M for 96 hours. **g-h**. Representative western blots detecting SWELL1  
1577 and  $\beta$ -actin in 3T3-F442A adipocytes (**g**) and the corresponding mean densitometric data (**h**)  
1578 obtained from treatment with vehicle (n=5), SN-401 (n=5), SN-406 (n=6), Inactive 1 (n=5) or  
1579 Inactive 2 (n=4) at 1  $\mu$ M for 96 hours. **i-j**. Representative immunostaining images demonstrating  
1580 localization of endogenous SWELL1 in 3T3-F442A preadipocytes treated with vehicle or SN-  
1581 401/SN-406/Inactive 1 at 10  $\mu$ M for 48 hours (Scale bar – 20  $\mu$ m) (**i**) and the corresponding  
1582 quantification of mean SWELL1 membrane- versus cytoplasm-localized fraction obtained from  
1583 vehicle (n=19), SN-401 (n=21), SN-406 (n=13 for 1  $\mu$ M and 10  $\mu$ M), or Inactive 1 (n=9 for 1  $\mu$ M  
1584 and n=13 for 10  $\mu$ M) treated cells (**j**). **k-l**. Representative western blots detecting SWELL1,  
1585 peNOS, eNOS, pAKT2, AKT2 and  $\beta$ -actin in HUVEC cells treated with either vehicle or 100 nM  
1586 SN-406 for 96 hours (**k**) and their corresponding densitometric ratios (**l**, n= 6 each) respectively.  
1587 **m-n**. Representative western blots detecting SWELL1, peNOS, eNOS, pAKT2, AKT2 and  $\beta$ -  
1588 actin in HUVEC cells treated with either vehicle or 500 nM Inactive 1 for 96 hours (**m**) and their  
1589 corresponding densitometric ratios (**n**, n= 6). **o-p**. Representative western blots detecting  
1590 peNOS, eNOS and  $\beta$ -actin in HUVEC cells treated with either vehicle or 10, 30,100, 300 or 500  
1591 nM SN-401 for 96 hours (**o**, n=2 each) and the corresponding curve for dose dependent  
1592 stimulation of peNOS/eNOS expression (**p**). Data are represented as mean  $\pm$ SEM. Two-tailed  
1593 unpaired t-test was used in **f** and **h** (compared to vehicle), **l** and **n**. One-way ANOVA was used  
1594 for **b**, **d** and **j**. Non-linear least square method was used to fit the dose response curve in **p**. \*, \*\*  
1595 and \*\*\* represents  $p<0.05$ ,  $p<0.01$  and  $p<0.001$  respectively.

1596

1597 **Figure 7. SWELL1-active compounds prevent reductions in SWELL1 protein and rescue**  
1598 **SWELL1 dependent islet insulin secretion under glucolipotoxic conditions. a-b.**  
1599 Representative western blots detecting SWELL1 and  $\beta$ -actin in 3T3-F442A adipocytes pre-  
1600 treated with either vehicle or SN-401/SN-406/Inactive 2 (10  $\mu$ M) for 96 hours and subsequently  
1601 treated with +/- palmitate in the absence or presence of compounds for 16 hours (**a**, n=3 in each  
1602 condition) and corresponding densitometric ratio for SWELL1/ $\beta$ -actin (**b**). **c.** Schematic for  
1603 glucose stimulated insulin secretion (GSIS) perfusion assay in human or mouse islets. **d-e.**  
1604 GSIS perfusion assay of islets obtained from cadaveric human islets transduced with either  
1605 adenoviral short hairpin control (shScramble) or SWELL1 (shSWELL1) for 12 hours, then pre-  
1606 treated with either vehicle or SN-401 (10  $\mu$ M) for 96 hours and subsequently treated with +/-  
1607 palmitate or palmitate with +/- SN-401 (n = 3 each) for 16 hours (**d**) and the corresponding area  
1608 under the curve (AUC) (**e**). **f-g.** GSIS perfusion assay of WT and  $\beta$ -cell SWELL1 KO islets  
1609 obtained by isolation of islets from floxed-SWELL1<sup>fl/fl</sup> mouse and transducing either with  
1610 adenoviral control (WT) or Cre-recombinase (SWELL1 KO) for 12 hours, then pre-treated with  
1611 either vehicle or SN-401 (10  $\mu$ M) for 96 hours and subsequently treated with +/- palmitate or  
1612 palmitate with +/- SN-401 (n = 3 each) for 16 hours (**f**) and the corresponding area under the  
1613 curve (AUC) (**g**). Data are represented as mean  $\pm$ SEM except for **f** where a representative trace  
1614 was shown for illustrative purposes. Two-tailed unpaired t-test was used in **b**. One-way ANOVA  
1615 was used for **e** and **g**. \*, \*\* and \*\*\* represents  $p < 0.05$ ,  $p < 0.01$  and  $p < 0.001$  respectively and 'ns'  
1616 indicates the difference was not significant.

1617

1618 **Figure 8. SWELL1-active SN-401 congeners improve glycemic control in murine T2D**  
1619 **models. a.** Fasting glucose levels, GTT and its corresponding area under the curve (AUC) of 8  
1620 week HFD-fed mice treated with either SWELL1-inactive 1 or SWELL1-active SN-403 (5 mg/kg  
1621 i.p) for 4 days (n = 5 in each group). **b.** Fasting glucose levels, GTT and its corresponding AUC  
1622 of 12 weeks HFD-fed mice pre- and post-treatment with SN-406 (5 mg/kg i.p) for 4 days (n = 5

1623 in each group). **c.** GTT and corresponding AUC of 12 weeks HFD-fed mice treated with either  
1624 SWELL1-inactive 1 or SWELL1-active SN-406 (5 mg/kg i.p) for 4 days (n = 7 in each group) and  
1625 **(d)** the corresponding HOMA-IR index. **e.** Glucose-stimulated insulin secretion (GSIS) perfusion  
1626 assay of islets isolated from mice in **c** (left) and the corresponding area under the curve (right).  
1627 **f.** GTT and corresponding AUC of polygenic-T2D KKA<sup>y</sup> mice treated with either SWELL1-  
1628 inactive 1 (n=5) or SWELL1-active SN-407 (n=6) (5 mg/kg i.p) for 4 days. **g.** Glucose-stimulated  
1629 insulin secretion (GSIS) perfusion assay from islets isolated from mice in **f** (left) and the  
1630 corresponding area under the curve (right). Data are represented as mean  $\pm$ SEM. Two-tailed  
1631 unpaired t-test was used in **a,c-d, e-g** for FG, GTT AUC, GSIS AUC and HOMA-IR. **d.** Paired t-  
1632 test was used in **b** for FG and GTT AUC. Two-way ANOVA was used in **a-c** and **f** for GTTs.  
1633 Statistical significance is denoted by \*, \*\* and \*\*\* representing  $p<0.05$ ,  $p<0.01$  and  $p<0.001$   
1634 respectively.

1635

1636

1637

1638

1639

1640

1641

1642

1643

1644

1645

1646

1647

1648

1649

1650

1651

1652

1653 **Supplementary Figure Legends**

1654

1655 **Supplementary Fig. S1. Transient expression of full-length SWELL1 with C-terminal**

1656 **3XFlag tag rescues  $I_{Cl,SWELL}$  and traffics to the plasma membrane.**

1657 **a-c.** Current-voltage plots of  $I_{Cl,SWELL}$  measured in 3T3-F442A preadipocytes WT **(a)**, KO **(b)** and  
1658 adenoviral overexpression of SWELL1 in KO (KO+SWELL1 O/E) **(c)** at baseline (iso, black  
1659 trace) and hypotonic (hypo, red trace) stimulation respectively. **d.** Immunostaining images  
1660 demonstrating localization of endogenous SWELL1 or overexpressed SWELL1 with anti-Flag or  
1661 anti-SWELL1 antibody (Scale bar: 20  $\mu$ m). **e.** Validation of SWELL1 antibody in WT 3T3-F442A  
1662 compared to SWELL1 KO pre-adipocytes (Scale bar: 20  $\mu$ m), revealing a punctate pattern of  
1663 endogenous SWELL1 localization (inset).

1664

1665 **Supplementary Fig. S2. Increases in SWELL1 protein are not associated with increases in**

1666 **mRNA expression of SWELL1/LRRC8a or LRRC8b-e.** **a.** Relative mRNA expression of

1667 LRRC8 family members relative to GAPDH assessed by qPCR (n = 3 each) for 3T3 F-442A

1668 preadipocytes treated with either vehicle or 10  $\mu$ M SN-401 for 96 hours. **b.** Western blots

1669 showing increase in SWELL1 protein expression relative to  $\beta$ -actin in 3T3-F442A adipocytes

1670 treated with either vehicle or 10  $\mu$ M SN-401 for 96 hours. **c.** Relative mRNA expression of

1671 LRRC8 family members relative to GAPDH assessed by qPCR (n = 4 each) from the same 3T3-

1672 F442A adipocytes treated with either vehicle or 10  $\mu$ M SN-401 for 96 hours obtained in **b.** Data

1673 are represented as mean  $\pm$ SEM. Two-tailed unpaired t-test was used in **a** and **c** where \*, \*\* and

1674 \*\*\* represents  $p < 0.05$ ,  $p < 0.01$  and  $p < 0.001$  respectively.

1675

1676 **Supplementary Fig. S3. SN-401 activity in lean non-T2D mice and effects of chronic**

1677 **dosing in HFD-fed mice.** Fasting glucose levels **(a)**, GTT **(b)** and ITT **(c)** of C57BL/6 lean mice

1678 on regular-chow diet treated with either vehicle or SN-401 (5 mg/kg i.p) for 10 days (n = 7 males

1679 in each group). **d.** GTT of HFD-T2D mice (8 weeks HFD) treated with either vehicle (n = 5  
1680 males) or SN-401 (5 mg/kg i.p, n = 4 males) for 8 weeks. Data are represented as mean  $\pm$ SEM.  
1681 Two-tailed unpaired t-test was used in **a.** 'ns' indicates the difference was not significant.

1682

1683 **Supplementary Fig. S4. SN-401 improves non-alcoholic fatty liver disease in murine T2D**

1684 **models.** Images of hematoxylin and eosin stained liver histology sections of HFD-T2D mice  
1685 treated with either vehicle or SN-401 (5 mg/kg i.p) as in **Fig. 4e.** Scale: 10X, 100  $\mu$ m and 20X,  
1686 50  $\mu$ m).

1687

1688 **Supplementary Fig. S5. Defining the SN-401-SWELL1 structure-activity relationship by**  
1689 **combining chemical synthesis, molecular docking simulations and patch-clamp**

1690 **electrophysiology.** Chemical structures (top) of **a.** SN-401/DCPIB, **(b)** SN-403 and **(c)** SN-407  
1691 and  $I_{Cl,SWELL}$  inward and outward current over time (bottom) upon hypotonic (210 mOsm)  
1692 stimulation and subsequent inhibition by 7  $\mu$ M SN-401, SN-403 and SN-407 in HEK-293 cells.

1693 **d.** Binding poses for Inactive 1; (i) side view of first binding pose of Inactive 1 showing potential  
1694 electrostatic interaction with R103 (dotted circle) but unable to reach into and occupy the  
1695 hydrophobic cleft (black arrow); (ii) side view of second pose for Inactive 1 with the cyclopentyl  
1696 group occupying the hydrophobic cleft (broken circle) but the carboxylate group unable to reach  
1697 and interact with R103 (black arrow). **e.** Binding pose for Inactive 2 reveal that the carboxylate  
1698 group can reach and electrostatically interact with R103 but in the absence of the butyl group  
1699 cannot orient the cyclopentyl ring to occupy the hydrophobic cleft without introducing excessive  
1700 structural strain on the carbon connecting the core with the cyclopentyl ring. **f-g.** (i) top and (ii)  
1701 side view of binding poses of SN-403 (**f**) and SN-407 (**g**); the carboxylate groups interact with  
1702 guanidine group of R103 residues (black circle), the cyclopentyl group occupies a shallow  
1703 hydrophobic cleft at the interface of two monomers formed by D102 and L101 (black broken

1704 circle) and the alkyl side chain SN-403 or SN-407 interacts with the alkyl side chain of R103  
1705 (purple broken circle).

1706

1707 **Supplementary Fig. S6. Purification, reconstitution, and cryo-EM imaging of SWELL1. a.**

1708 Size exclusion chromatogram (Superose 6 Increase) of SWELL1 purified into DDM detergent

1709 (left). Pooled fractions corresponding to hexameric SWELL1 are highlighted in blue. Coomassie-

1710 stained SDS-PAGE of pooled SWELL1 homohexamer-containing fractions (right). **b.** Size

1711 exclusion chromatogram of SWELL1 reconstituted into MSP1E3D1 lipid nanodiscs (left-upper).

1712 Pooled fractions were then re-run (left-lower) and pooled fractions were concentrated for drug

1713 addition, grid freezing, and coomassie-stained SDS-PAGE (right). **c.** Example micrograph from

1714 SN-407- SWELL1 in MSP1E3D1 cryo-EM data collection.

1715

1716 **Supplementary Fig. S7. Cryo-EM processing pipeline for SN-407-SWELL1 in MSP1E3D1**

1717 **lipid nanodiscs.** Overview of Cryo-EM data processing pipeline in cryoSPARC and Relion. See

1718 Methods for additional details.

1719

1720 **Supplementary Fig. S8. Cryo-EM validation for SN-407-SWELL1 in MSP1E3D1 lipid**

1721 **nanodiscs. a-b.** Local resolution estimated in Relion colored as indicated on the final map for

1722 vertical (left) and tilted (right) drug density classes. **c-d.** Angular distribution of particles used in

1723 final refinement with maps for reference. **e-f.** Fourier Shell Correlation (FSC) relationships

1724 between (black) the two unfiltered half-maps from refinement and used for calculating overall

1725 resolution at 0.143, (red) the final map and model, (gray) half-map one and model, and (blue)

1726 half-map and model.

1727

1728

1729

1730 **Supplementary Fig. S9. SN-406 increase SWELL1 plasma membrane localization while**  
1731 **Inactive 1 does not and SN-401 mediated induction of peNOS activity in HUVECs is**  
1732 **SWELL1 dependent. a.** Representative immunostaining images demonstrating localization of  
1733 endogenous SWELL1 in WT 3T3-F442A preadipocytes treated with vehicle or SN-406/Inactive  
1734 1 at 1  $\mu$ M for 48h (Scale bar: 10  $\mu$ m). **b.** Western blots detecting SWELL1, peNOS, eNOS and  
1735  $\beta$ -actin in siControl and siSWELL1 mediated knockdown in HUVEC cells treated with either  
1736 vehicle or 500 nM SN-401 for 96 hours (n= 6 each). **c-d.** Densitometric ratios of SWELL1/ $\beta$ -  
1737 actin (n=12 each) (**c**) and peNOS/ $\beta$ -actin (n=6 each) (**d**) combined from small interfering and  
1738 short hairpin mediated SWELL1 knockdown in HUVECs treated with either vehicle or 500 nM  
1739 SN-401 for 96 hours. Data are represented as mean  $\pm$ SEM. Two-tailed unpaired t-test was used  
1740 in **c** & **d**. \*, \*\* and \*\*\* represents  $p<0.05$ ,  $p<0.01$  and  $p<0.001$  respectively. 'ns' indicates the  
1741 difference was not significant.

1742

1743 **Supplementary Fig. S10. SN-40X compounds *in vivo* pharmacokinetics and oral efficacy.**  
1744 **a-b.** SN-401 and SN-406 *in vivo* pharmacokinetics 5 mg/kg intraperitoneally (**a**) and by oral  
1745 gavage (**b**) in plasma (n=3 mice for each time point, #-below detection limit of 1 nM). **c.** SN-401  
1746 *in vivo* pharmacokinetics 5 mg/kg intraperitoneally (i.p.) and by oral gavage (p.o.) in iWAT (n=3  
1747 mice for each time point, \$-below detection limit of 11 nM). **d.** Fasting glucose levels, GTT and  
1748 AUC of HFD-T2D mice (10 weeks HFD) treated with either vehicle (n = 6 males) or SN-401 (5  
1749 mg/kg p.o, n = 7 males) for 5 days. Data are represented as mean  $\pm$ SEM. Two-tailed unpaired t-  
1750 test was used in **d** for FG and AUC. Two-way ANOVA was used for GTT in **d**. Statistical  
1751 significance is denoted by \*, \*\* and \*\*\* representing  $p<0.05$ ,  $p<0.01$  and  $p<0.001$  respectively.

1752

1753

1754

1755 **Supplementary Tables**

1756

| Patient | Age (years) | Sex | BMI   | Random Glucose (mg/dl) | Estimated Glucose (mg/dl) | HbA1c (%) |
|---------|-------------|-----|-------|------------------------|---------------------------|-----------|
| Non-T2D | 44          | F   | 26.8  | 151.8                  | NA                        | 6.1       |
|         | 57          | M   | 28.7  | 144.3                  | NA                        | 5.3       |
|         | 24          | F   | 32.2  | 234                    | NA                        | NA        |
| T2D     | 46          | F   | 35.9  | 262.4                  | NA                        | 6.8       |
|         | 37          | F   | 38.1  | 253.8                  | NA                        | 8.2       |
|         | 51          | M   | 35.59 | NA                     | 157                       | 7.1       |

1757 **Supplementary Table. S1.** Characteristics of patients from whom cadaveric non-T2D and T2D  
 1758 islets were obtained for  $\beta$ -cell patch-clamp studies in **Figure 1b&d**. NA, not available.

1759

1760

| Patient | Age (years) | Sex | BMI  | HbA1c (%) | Figure    |
|---------|-------------|-----|------|-----------|-----------|
| Non-T2D | 50          | F   | 31.7 | 5.7       | Fig. 1e   |
|         | 61          | M   | 19.6 | 5.9       | Fig. 1e   |
|         | 54          | M   | 26.4 | 5.1       | Fig. 1e   |
|         | 31          | M   | 26.2 | 5.3       | Fig. 7d,e |
|         | 31          | F   | 20.3 | 4.8       | Fig. 7d,e |
|         | 66          | M   | 25.6 | 4.9       | Fig. 7d,e |
| T2D     | 62          | M   | 25.9 | 10        | Fig. 1e   |
|         | 48          | F   | 30.4 | 7.5       | Fig. 1e   |
|         | 54          | F   | 24.4 | 7.2       | Fig. 1e   |

1761 **Supplementary Table. S2.** Characteristics of non-T2D and T2D patients from whom cadaveric  
 1762 islets were obtained to measure SWELL1 protein expression and GSIS assay.

1763

1764

| Patient                    | Age (years) | Sex | BMI   | Random Glucose (mg/dl) | Estimated Glucose (mg/dl) | HbA1c (%) |
|----------------------------|-------------|-----|-------|------------------------|---------------------------|-----------|
| Lean <sup>#</sup>          | 52          | M   | 27.56 | 97                     | 111                       | 5.5       |
|                            | 61          | F   | 28.36 | 112                    | NA                        | 5.5       |
| Obese non-T2D <sup>#</sup> | 38          | F   | 55.10 | 88                     | 117                       | 5.7       |
|                            | 65          | F   | 32.02 | 100                    | 111                       | 5.5       |
|                            | 51          | F   | 48.80 | 97                     | 114                       | 5.6       |
| Obese-T2D                  | 41          | F   | 52.31 | 148                    | 151                       | 6.9       |

1765 **Supplementary Table. S3.** Characteristics of lean, non-T2D, and T2D bariatric surgery patients  
 1766 from whom primary adipocytes were isolated for patch-clamp studies **Figure 1g**. <sup>#</sup>Data from  
 1767 lean and obese non-T2D patients were reported previously in Zhang, Y *et al.* (2017).

1768

1769



| Patient       | Age (years) | Sex | BMI   | Random Glucose (mg/dl) | Estimated Glucose (mg/dl) | HbA1c (%) |
|---------------|-------------|-----|-------|------------------------|---------------------------|-----------|
| Lean          | 47          | F   | 24.85 | 97                     | 111                       | 5.5       |
| Obese non-T2D | 36          | F   | 43.05 | 106                    | 114                       | 5.6       |
| Obese non-T2D | 49          | M   | 59.43 | 119                    | 126                       | 6.0       |
| Obese non-T2D | 49          | F   | 41.6  | 101 (fast)             | NA                        | 5.7       |
| Obese non-T2D | 52          | F   | 49.8  | 89 (fast)              | NA                        | 5.9       |
| Obese non-T2D | 48          | F   | 50.18 | 84                     | 97                        | 5.0       |
| Obese non-T2D | 50          | F   | 38.81 | 100                    | 117                       | 5.7       |
| Obese non-T2D | 43          | M   | 57.65 | 105                    | 105                       | 5.3       |
| Obese-T2D     | 57          | F   | 53.69 | 273                    | 183                       | 8.0       |
| Obese-T2D     | 53          | F   | 57.21 | 122 (fast)             | NA                        | 6.4       |
| Obese-T2D     | 65          | M   | 40.53 | 250                    | 229                       | 9.6       |
| Obese-T2D     | 52          | F   | 37.70 | 109                    | 160                       | 7.2       |

1770  
1771  
1772  
1773  
1774

**Supplementary Table. S4.** Characteristics of lean, obese non-T2D, and obese T2D patients from whom adipose samples were obtained to measure SWELL1 protein expression levels in Figure 1h.

| Figure                      | Group      | Body weight | SEM  | N | Group  | Body weight | SEM  | N | Significance |
|-----------------------------|------------|-------------|------|---|--------|-------------|------|---|--------------|
| Fig. 3c (GTT)               | Vehicle    | 41.2        | 1.59 | 7 | SN-401 | 37          | 1.85 | 7 | ns           |
| Fig. 3c (ITT)               | Vehicle    | 40.9        | 1.51 | 7 | SN-401 | 36.2        | 1.74 | 7 | ns           |
| Fig. 3e (KKA <sup>a</sup> ) | Pre SN-401 | 32.9        | 1.49 | 3 | SN-401 | 30.9        | 1.96 | 3 | ns           |
| Fig. 3e (KKA <sup>y</sup> ) | Pre SN-401 | 45.4        | 1.03 | 6 | SN-401 | 42.5        | 1.01 | 6 | **           |
| Fig. 3f (KKA <sup>a</sup> ) | Pre SN-401 | 30.7        | 2.61 | 3 | SN-401 | 30.9        | 1.80 | 3 | ns           |
| Fig. 3f (KKA <sup>y</sup> ) | Pre SN-401 | 42.6        | 0.73 | 6 | SN-401 | 43.4        | 1.13 | 6 | ns           |
| Fig. 3h                     | Vehicle    | 23.9        | 0.62 | 6 | SN-401 | 24.3        | 0.88 | 6 | ns           |
| Fig. 3j (GTT)               | Vehicle    | 47.7        | 1.83 | 6 | SN-401 | 46          | 2.28 | 6 | ns           |

|                           |            |      |      |   |        |      |      |   |    |
|---------------------------|------------|------|------|---|--------|------|------|---|----|
| <b>Fig. 3j (ITT)</b>      | Vehicle    | 48.2 | 1.86 | 6 | SN-401 | 44.3 | 2.50 | 6 | ns |
| <b>Fig. 4b</b>            | Vehicle    | 38.8 | 1.0  | 7 | SN-401 | 37.5 | 0.9  | 8 | ns |
| <b>Fig. 4f</b>            | Vehicle    | 51.1 | 1.68 | 6 | SN-401 | 43.5 | 2.92 | 6 | *  |
| <b>Fig. 8a</b>            | Inactive 1 | 38   | 0.86 | 5 | SN-403 | 37.2 | 0.86 | 5 | ns |
| <b>Fig. 8b</b>            | Pre SN-406 | 47.8 | 0.74 | 5 | SN-406 | 45.4 | 1.05 | 5 | *  |
| <b>Fig. 8c</b>            | Inactive 1 | 44.5 | 0.91 | 7 | SN-406 | 44.7 | 0.74 | 7 | ns |
| <b>Fig. 8f</b>            | Inactive 1 | 38.4 | 0.85 | 5 | SN-407 | 38.7 | 1.11 | 6 | ns |
| <b>Suppl. Fig. 3b GTT</b> | Vehicle    | 25.7 | 0.33 | 7 | SN-401 | 25.2 | 0.27 | 7 | ns |
| <b>Suppl. Fig. 3c ITT</b> | Vehicle    | 26   | 0.31 | 7 | SN-401 | 25.4 | 0.31 | 7 | ns |
| <b>Suppl. Fig. 10d</b>    | Vehicle    | 40.3 | 0.77 | 6 | SN-401 | 37.2 | 0.89 | 7 | *  |

**Supplementary Table S5.** Average body weights of mice used for *in vivo* experiments in this study.

1775  
1776  
1777  
1778

| <b>Data collection</b>                              | <b>LRRC8A with SN-407 (Vertical)</b> | <b>LRRC8A with SN-407 (Tilted)</b> |
|-----------------------------------------------------|--------------------------------------|------------------------------------|
| PDB <sup>§</sup>                                    | XXXX                                 | XXXX                               |
| EMDB <sup>§</sup>                                   | XXXX                                 | XXXX                               |
| EMPIAR <sup>§</sup>                                 | XXXX                                 | XXXX                               |
| Total movies #                                      | 3576                                 |                                    |
| Selected movies #                                   | 2968                                 |                                    |
| Magnification                                       | 36,000 x                             |                                    |
| Voltage (KV)                                        | 200                                  |                                    |
| Electron exposure (e <sup>-</sup> /Å <sup>2</sup> ) | 51.59                                |                                    |
| Frame #                                             | 50                                   |                                    |
| Defocus range (um)                                  | -0.7 to -2.2                         |                                    |
| Super resolution pixel size (Å <sup>2</sup> )       | 0.5685                               |                                    |
| Binned pixel size (Å <sup>2</sup> )                 | 1.137                                |                                    |
| <b>Processing</b>                                   |                                      |                                    |

|                                               |               |               |
|-----------------------------------------------|---------------|---------------|
| Initial particle images (no.)                 | 936,282       |               |
| Final particle images (no.)                   | 85,831        | 78,324        |
| Map resolution Masked (Å, FSC = 0.143)        | 3.65 (Relion) | 3.69 (Relion) |
| Symmetry imposed                              | C1            | C1            |
| <b>Refinement</b>                             |               |               |
| Model resolution (Å, FSC = 0.143 / FSC = 0.5) | 3.06/3.72     | 3.15/3.75     |
| Map-sharpening B factor (Å <sup>2</sup> )     | 0             | 0             |
| <b>Composition</b>                            |               |               |
| Number of atoms                               | 16039         | 16309         |
| Number of protein residues                    | 1878          | 1878          |
| <b>R.m.s. deviations</b>                      |               |               |
| Bond lengths (Å)                              | 0.005         | 0.004         |
| Bond angles (Å)                               | 0.851         | 0.861         |
| <b>Validation</b>                             |               |               |
| MolProbity score                              | 1.41          | 1.43          |
| Clashscore                                    | 3.15          | 3.81          |
| <b>Ramachandran plot</b>                      |               |               |
| Favored (%)                                   | 95.66         | 96.15         |
| Allowed (%)                                   | 4.34          | 3.85          |
| Disallowed (%)                                | 0             | 0             |
| Rotamer outliers (%)                          | 0             | 0.06          |

1779 **Supplementary Table. S6.** Cryo-EM data collection, processing, refinement, and modeling data  
 1780 for SWELL1-SN-407 in MSP1E3D1 nanodiscs for vertical and tilted poses of SN-407.  
 1781 <sup>§</sup>Information will be available upon deposition.  
 1782  
 1783  
 1784

| PK parameters            | SN-401 |             |                 | SN-406 |             |                 |
|--------------------------|--------|-------------|-----------------|--------|-------------|-----------------|
|                          | Oral   | Intravenous | Intraperitoneal | Oral   | Intravenous | Intraperitoneal |
| AUCinf (ng*h/mL)         | 4682   | 5958        | 23030           | 3131   | 6532        | 18180           |
| Oral Bioavailability     | 79%    | NA          | NA              | 48%    | NA          | NA              |
| C <sub>max</sub> (ng/mL) | 781    | 5443        | 4367            | 660.7  | 15130       | 4300            |
| T-half (h)               | 2.585  | 1.428       | 2.056           | 2.058  | 0.7689      | 1.809           |

1785 **Supplementary Table S7.** SN-401 and SN-406 *in vivo* PK parameters.

1786

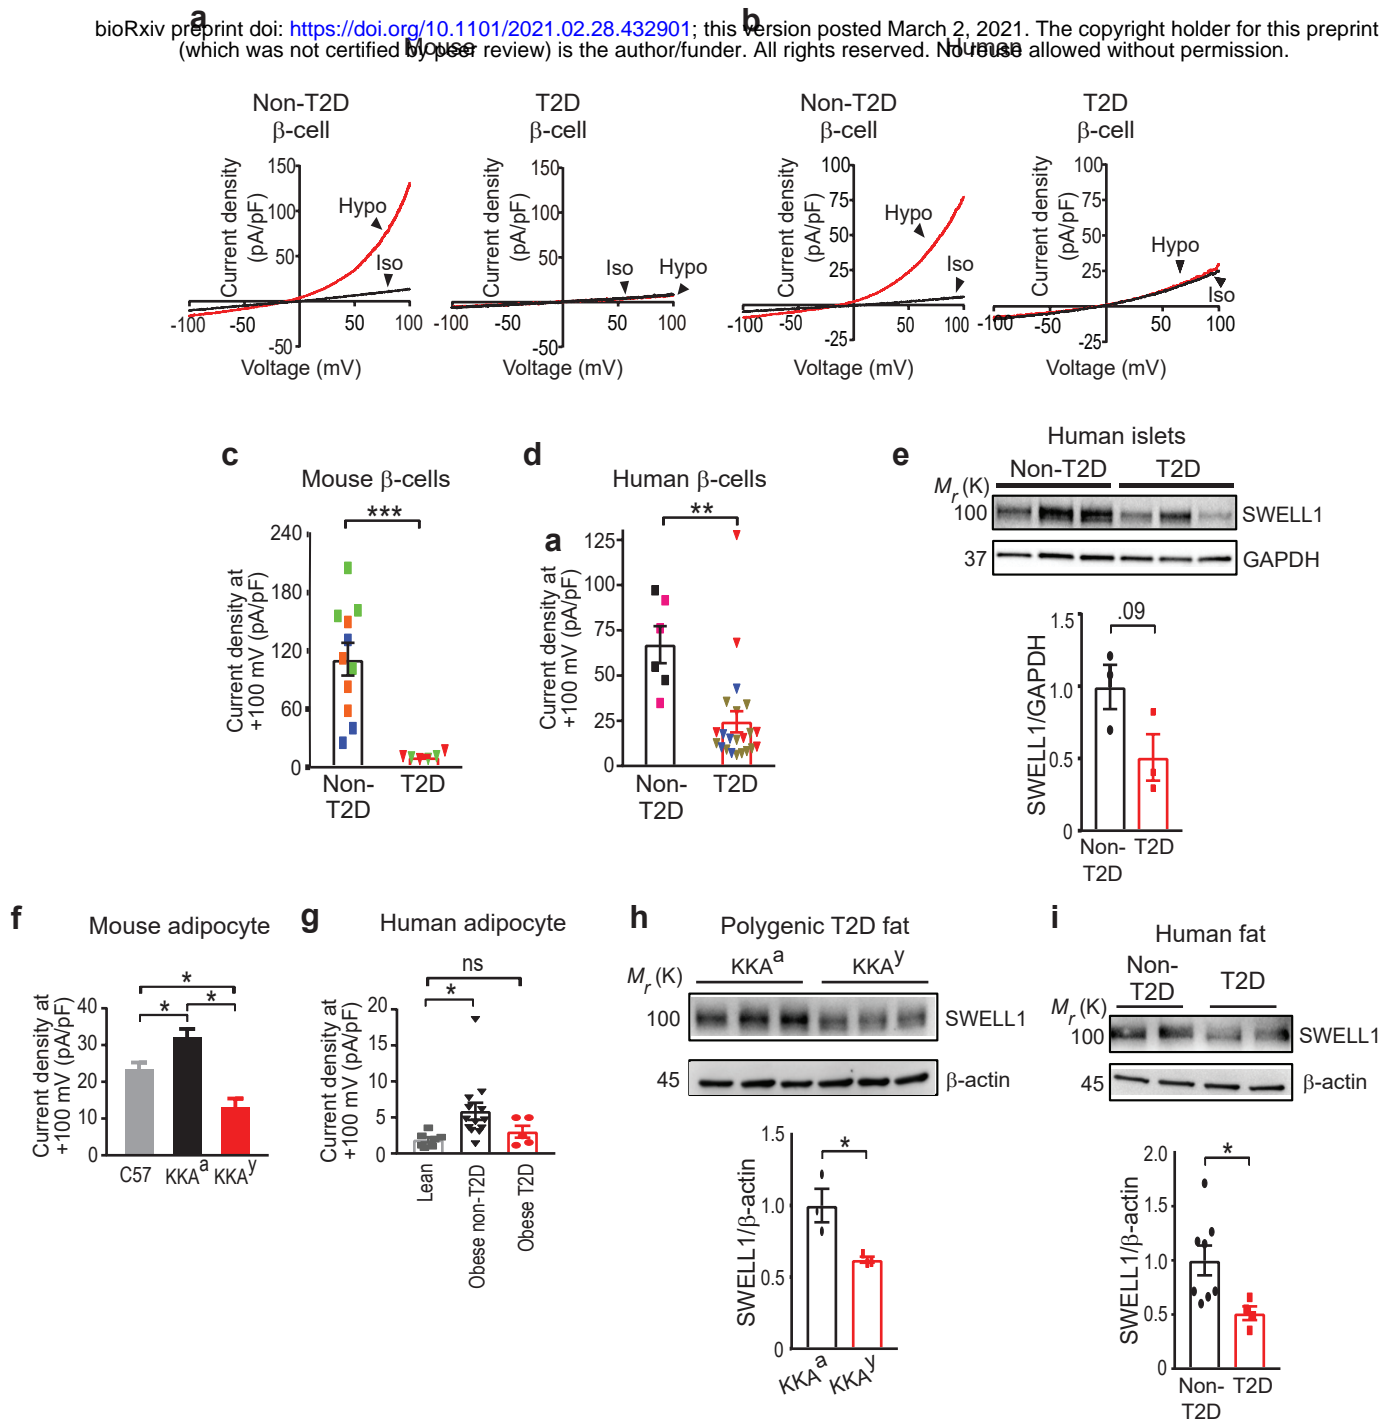

**Figure 1**

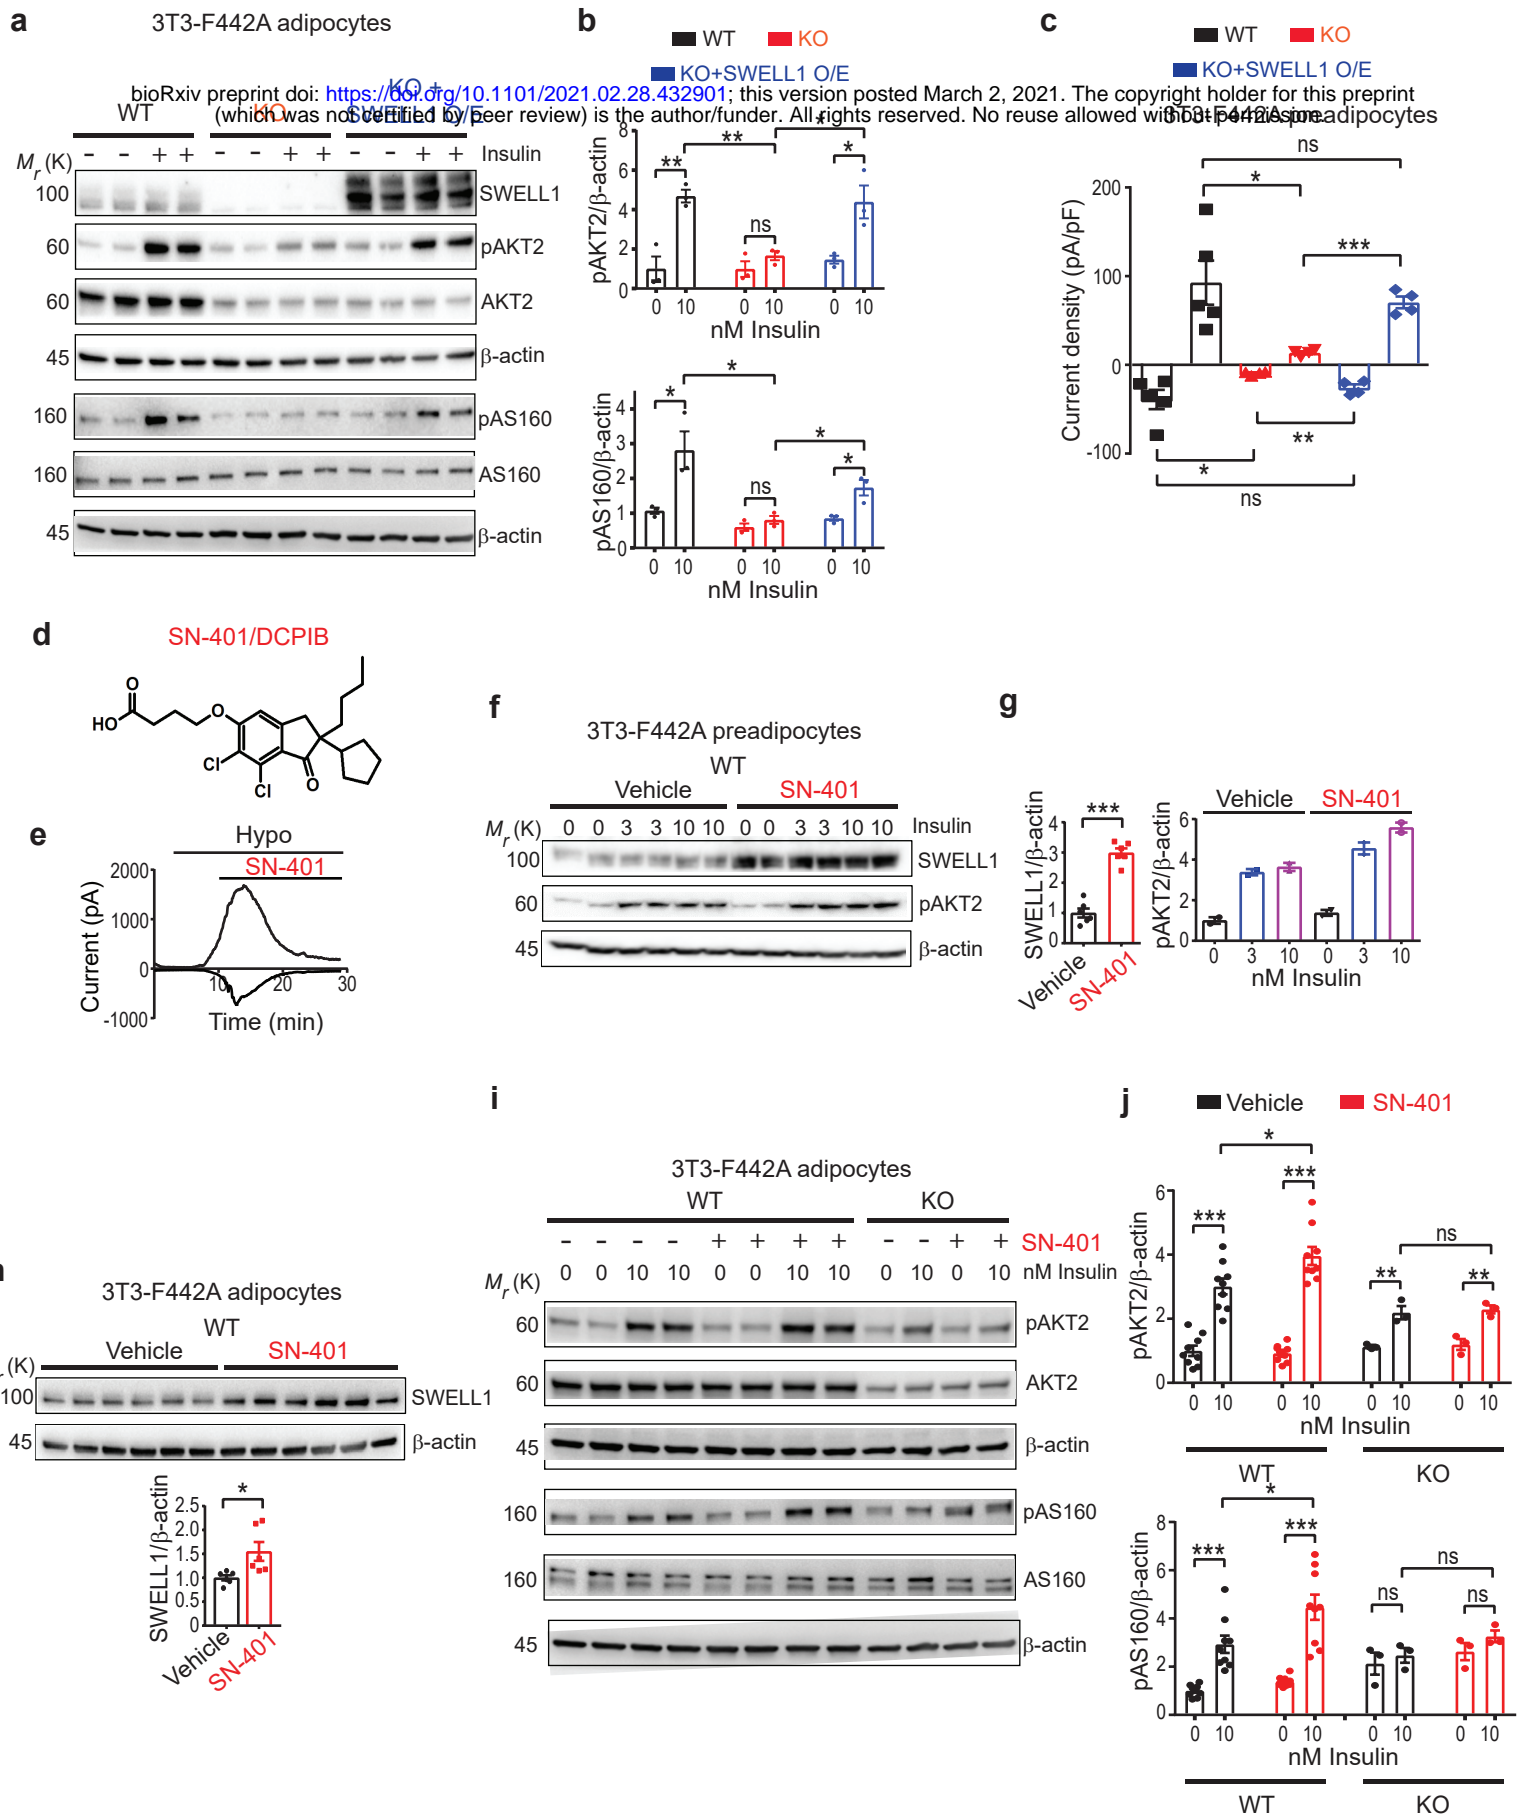

**Figure 2**

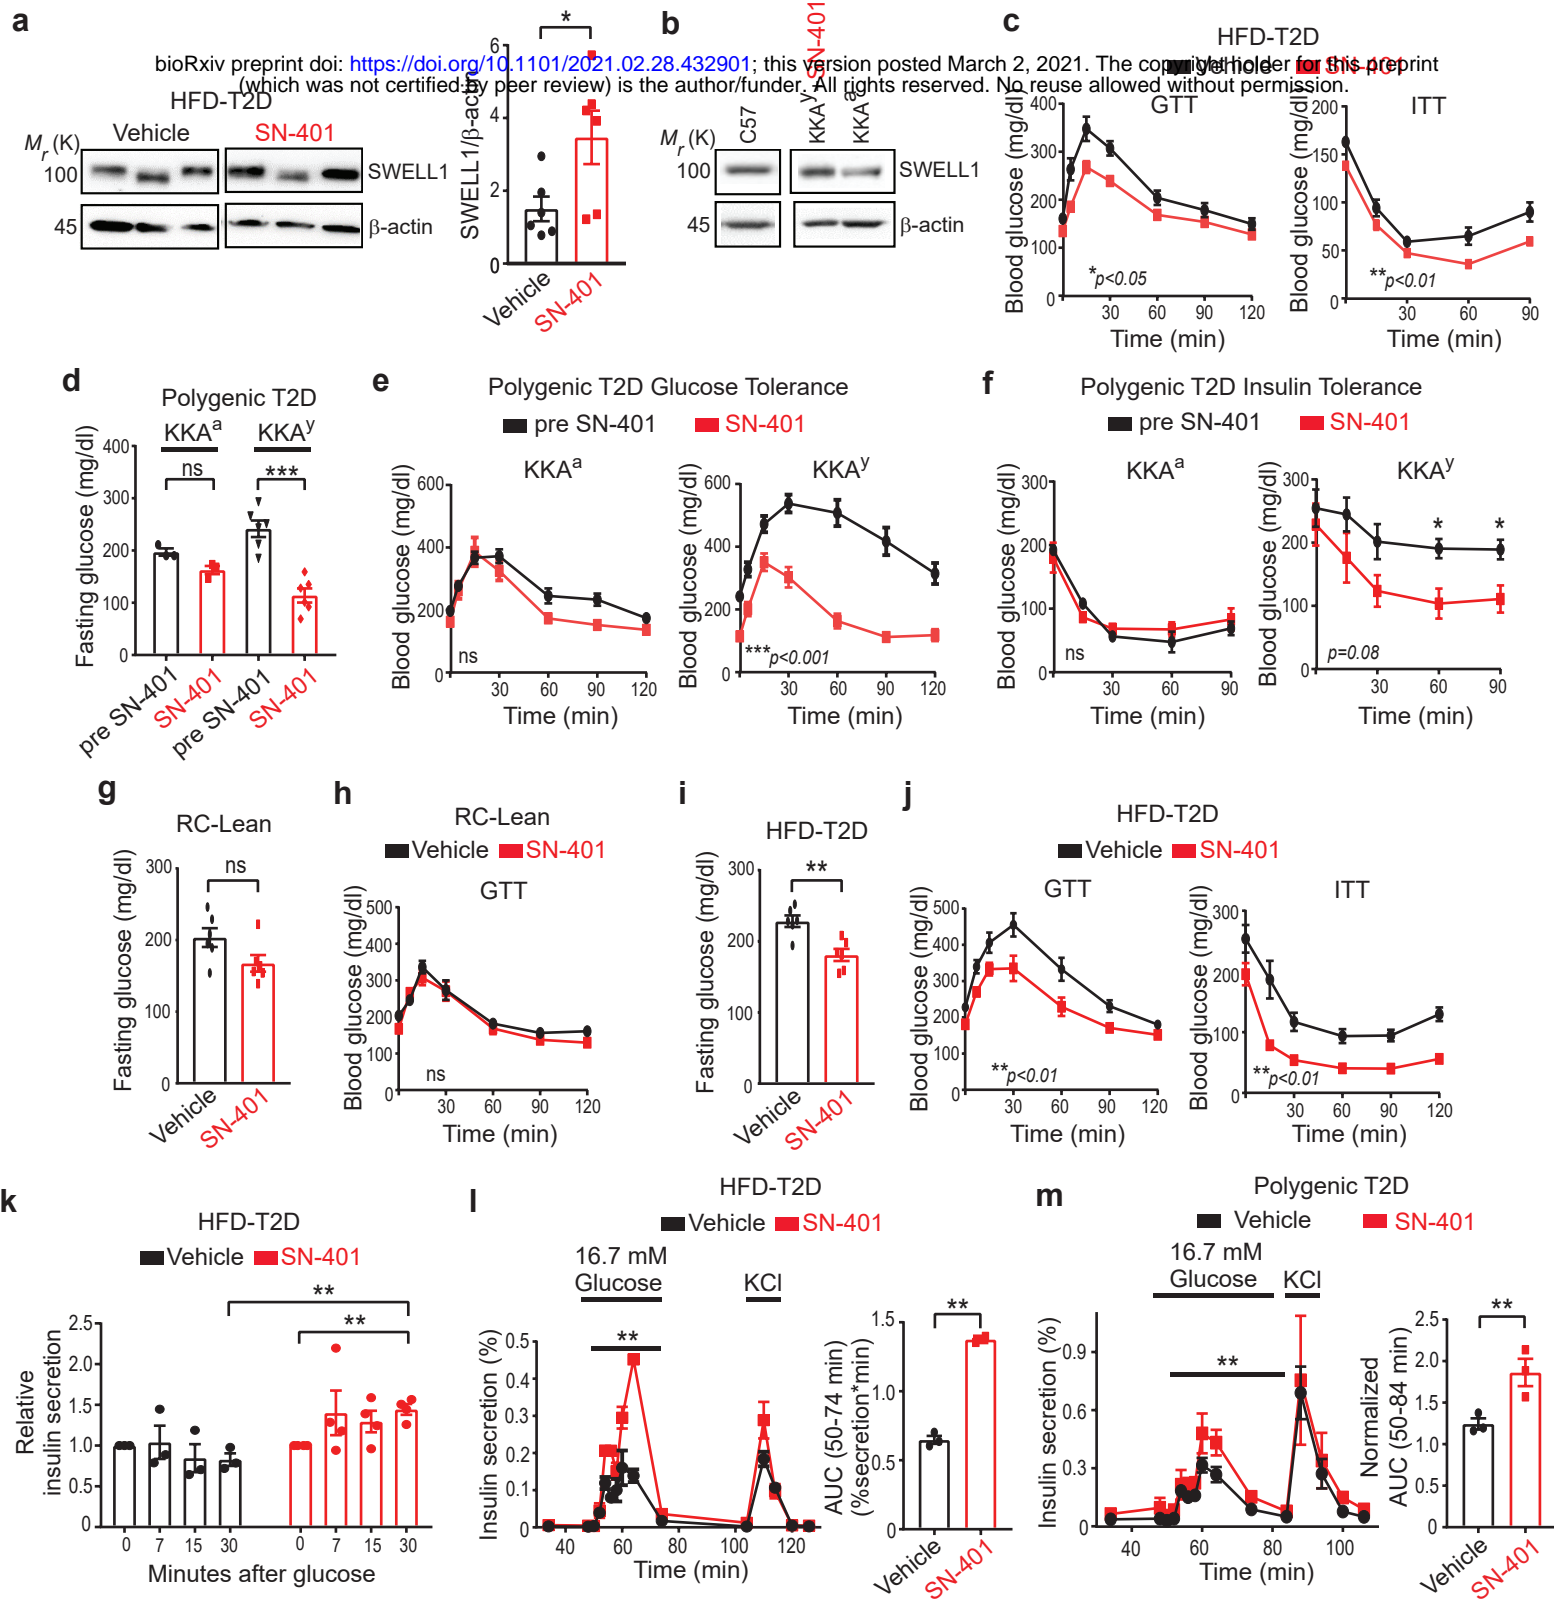

**Figure 3**



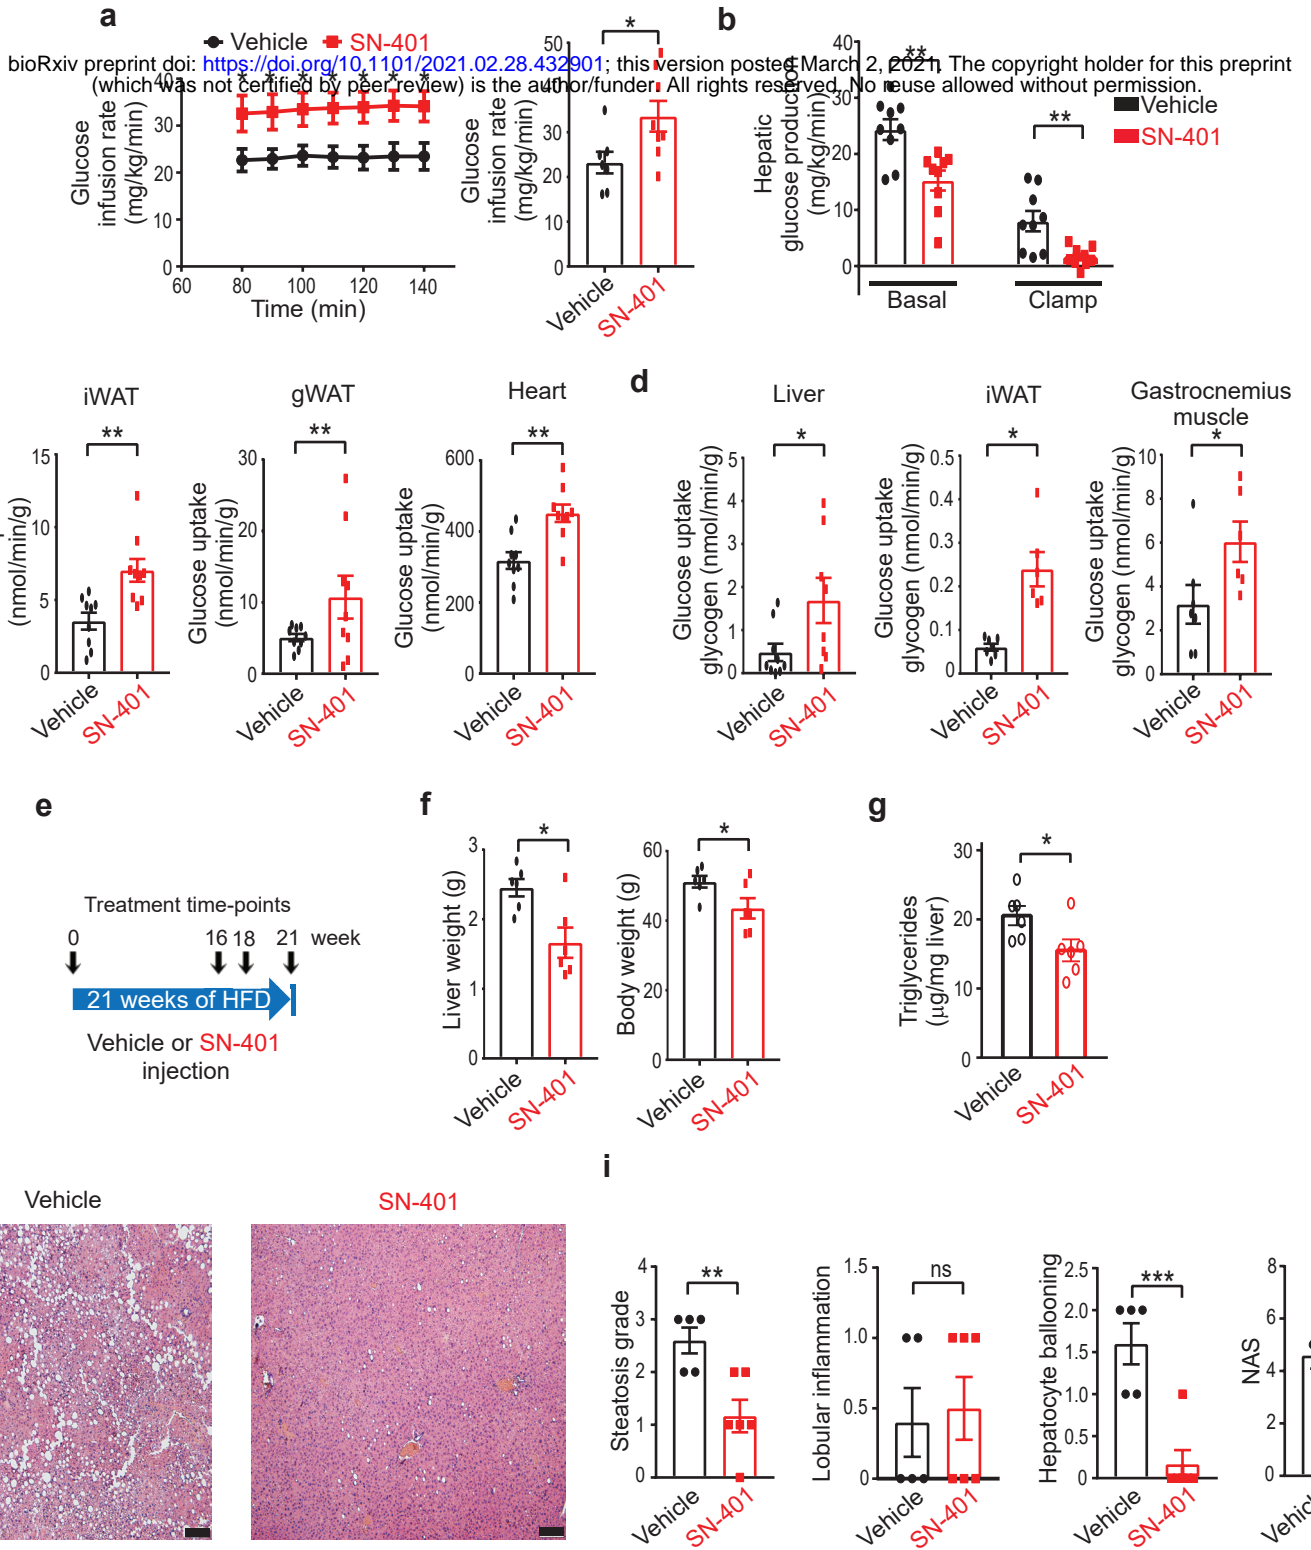

**Figure 4**

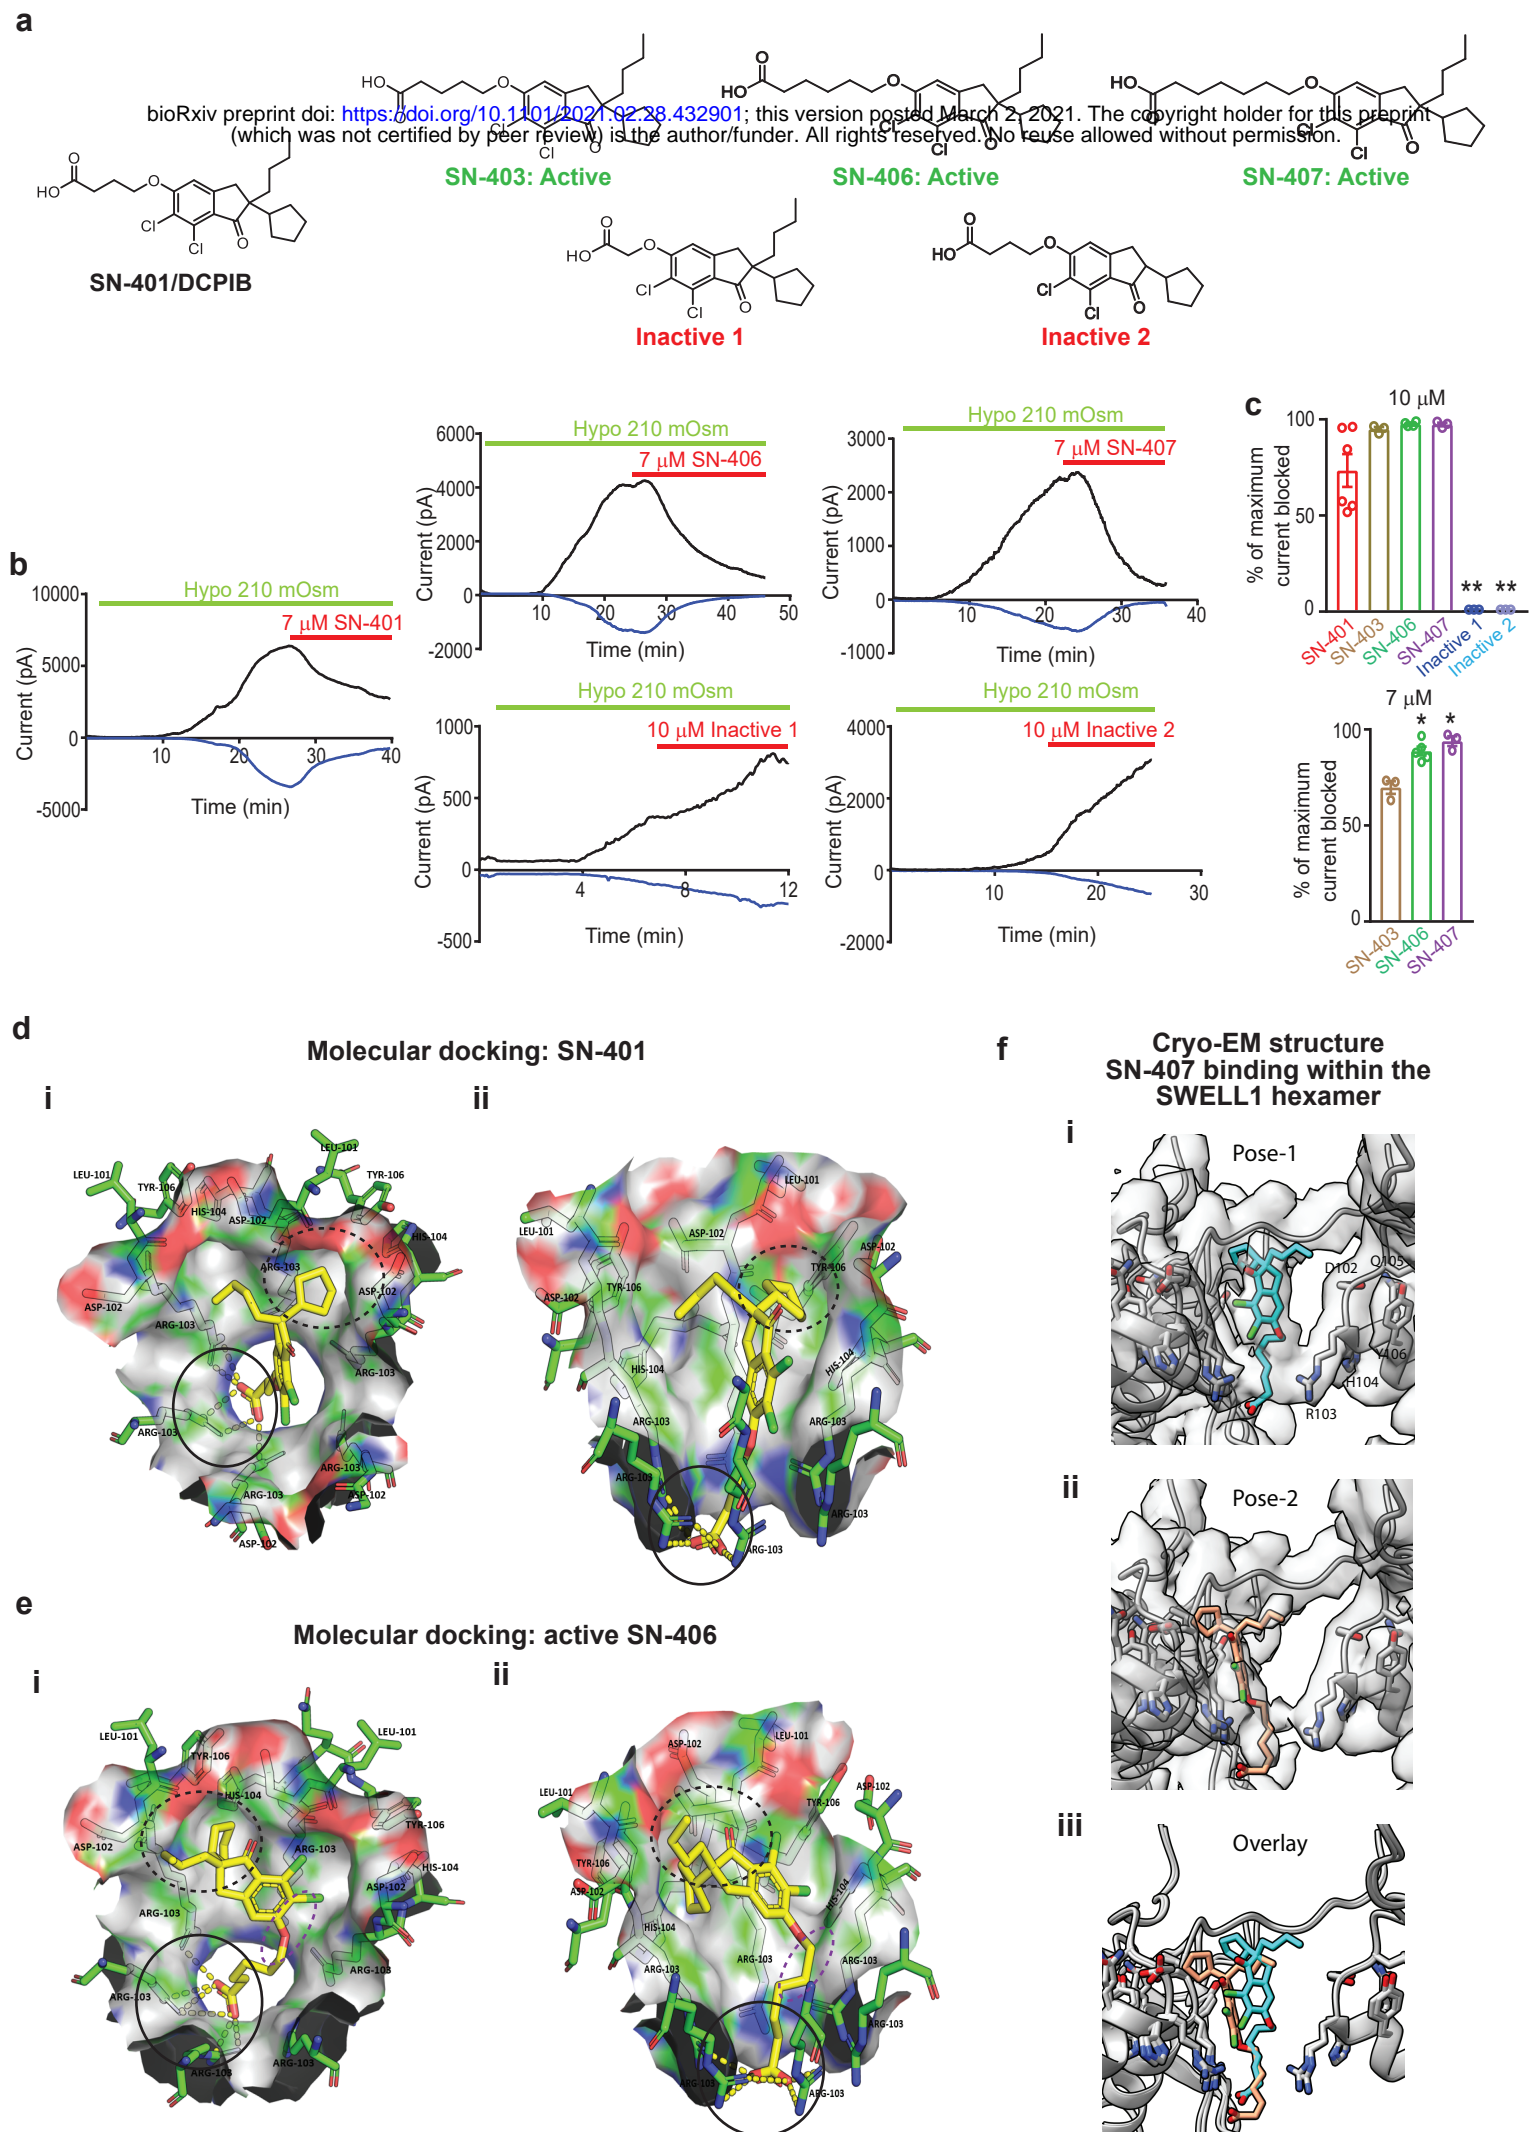

**Figure 5**

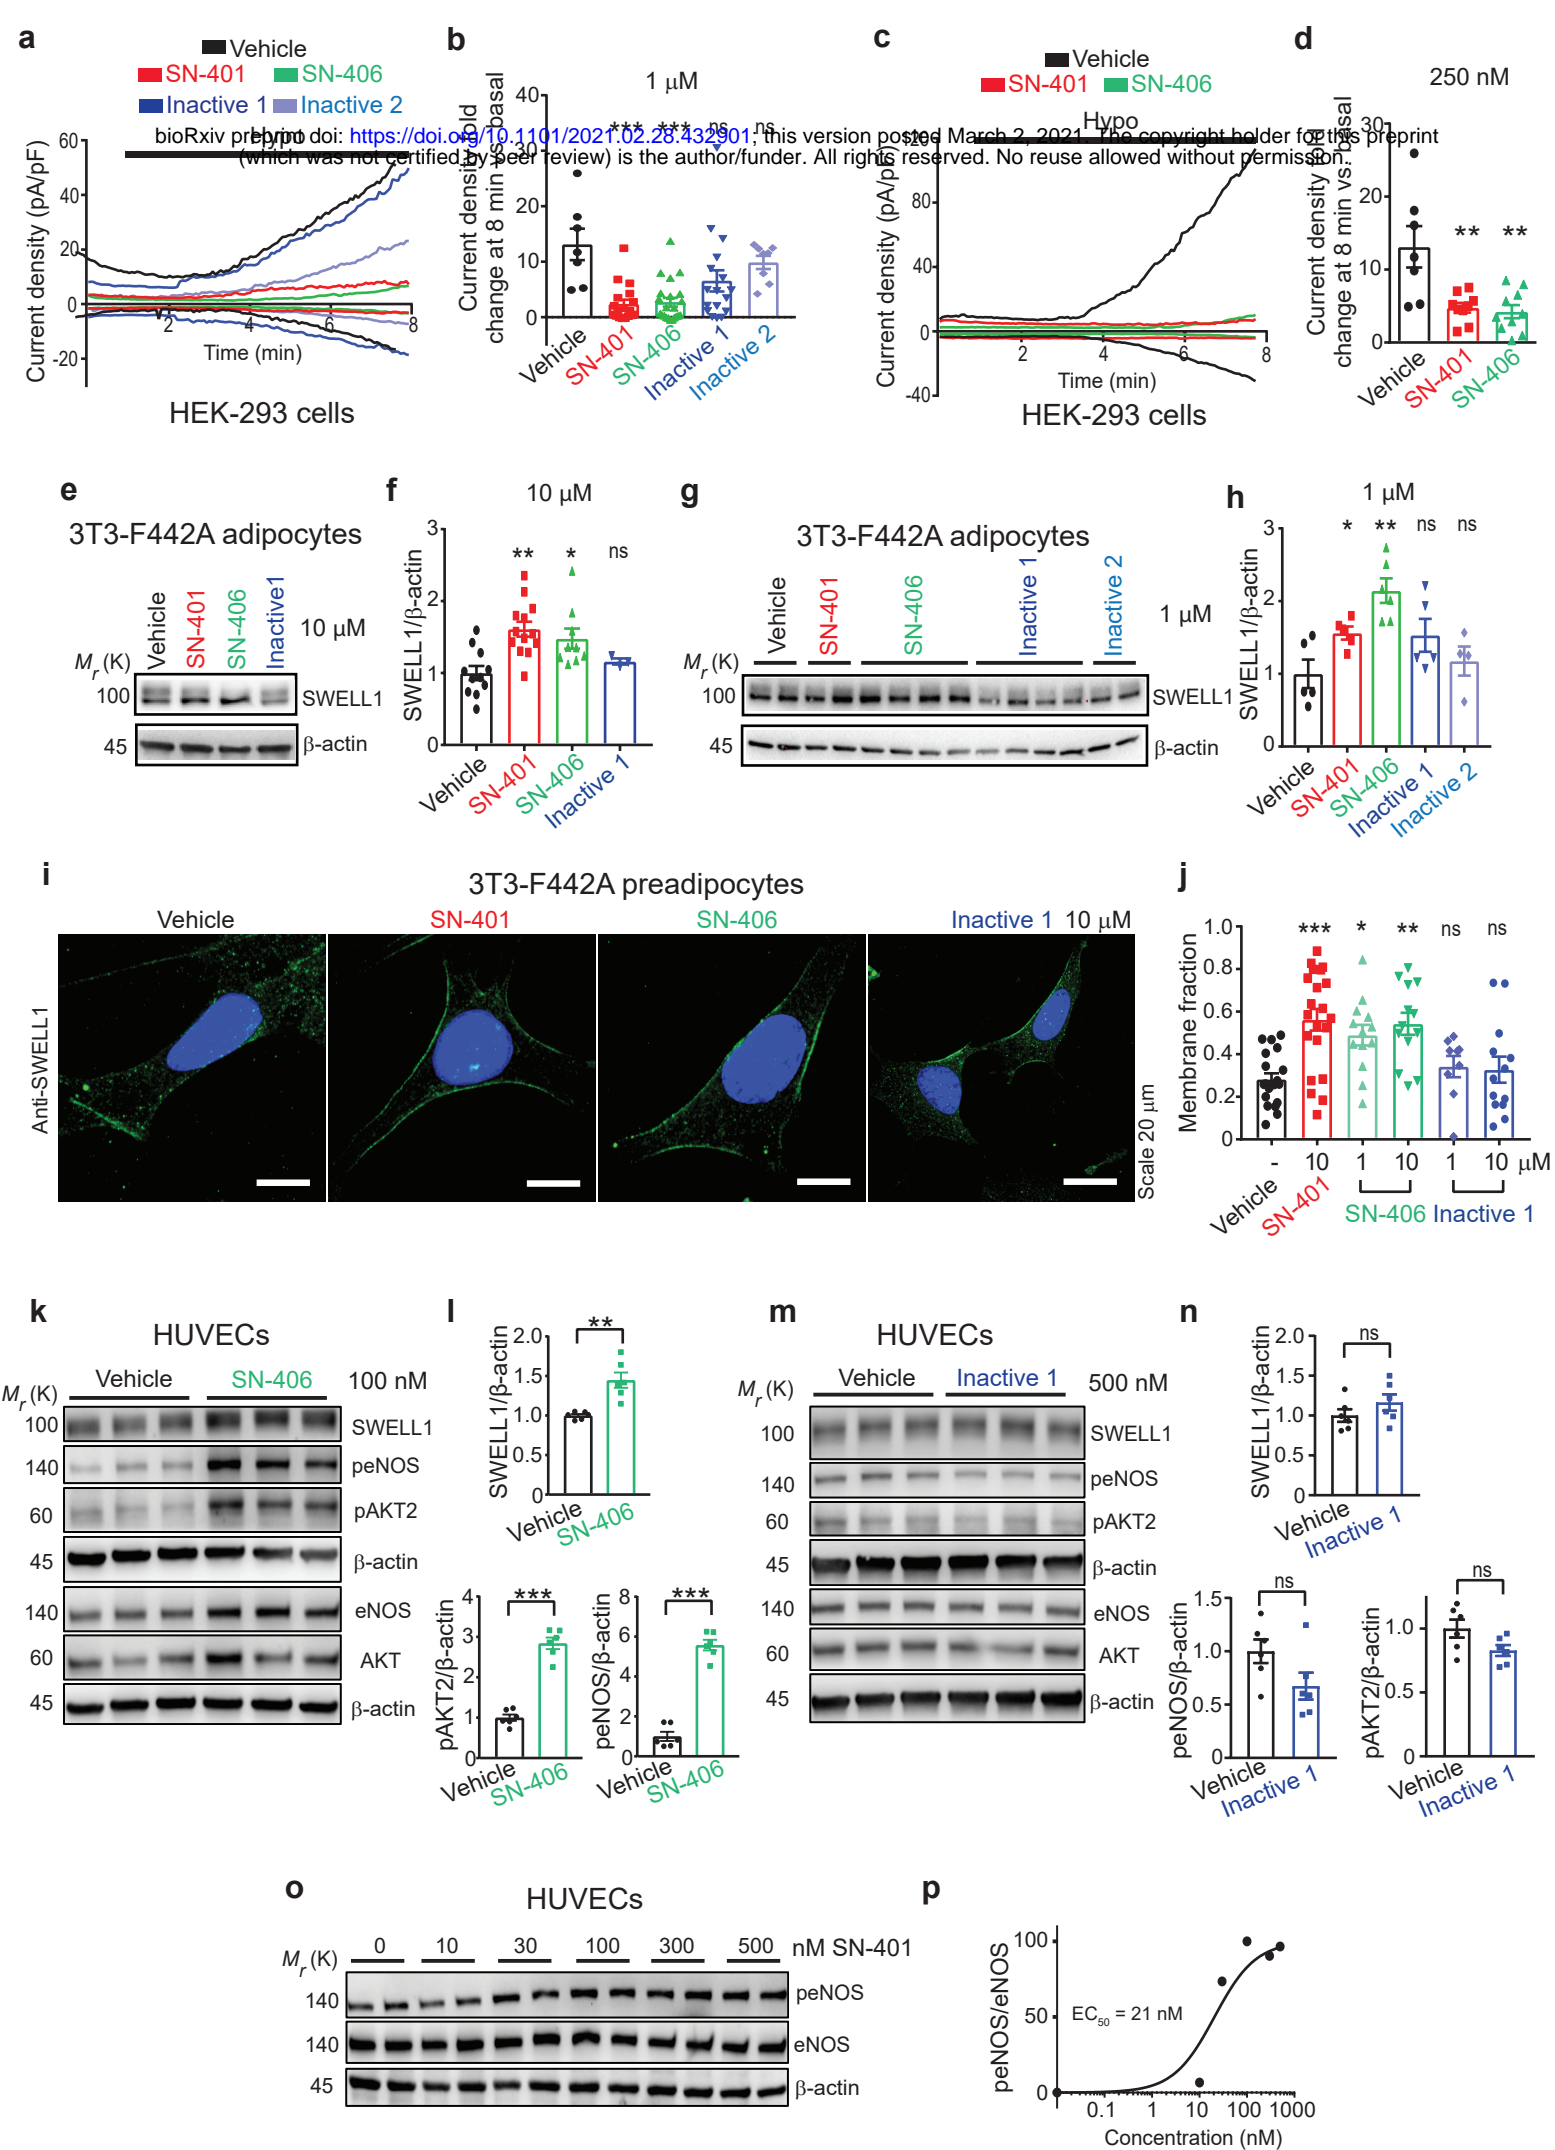

**Figure 6**

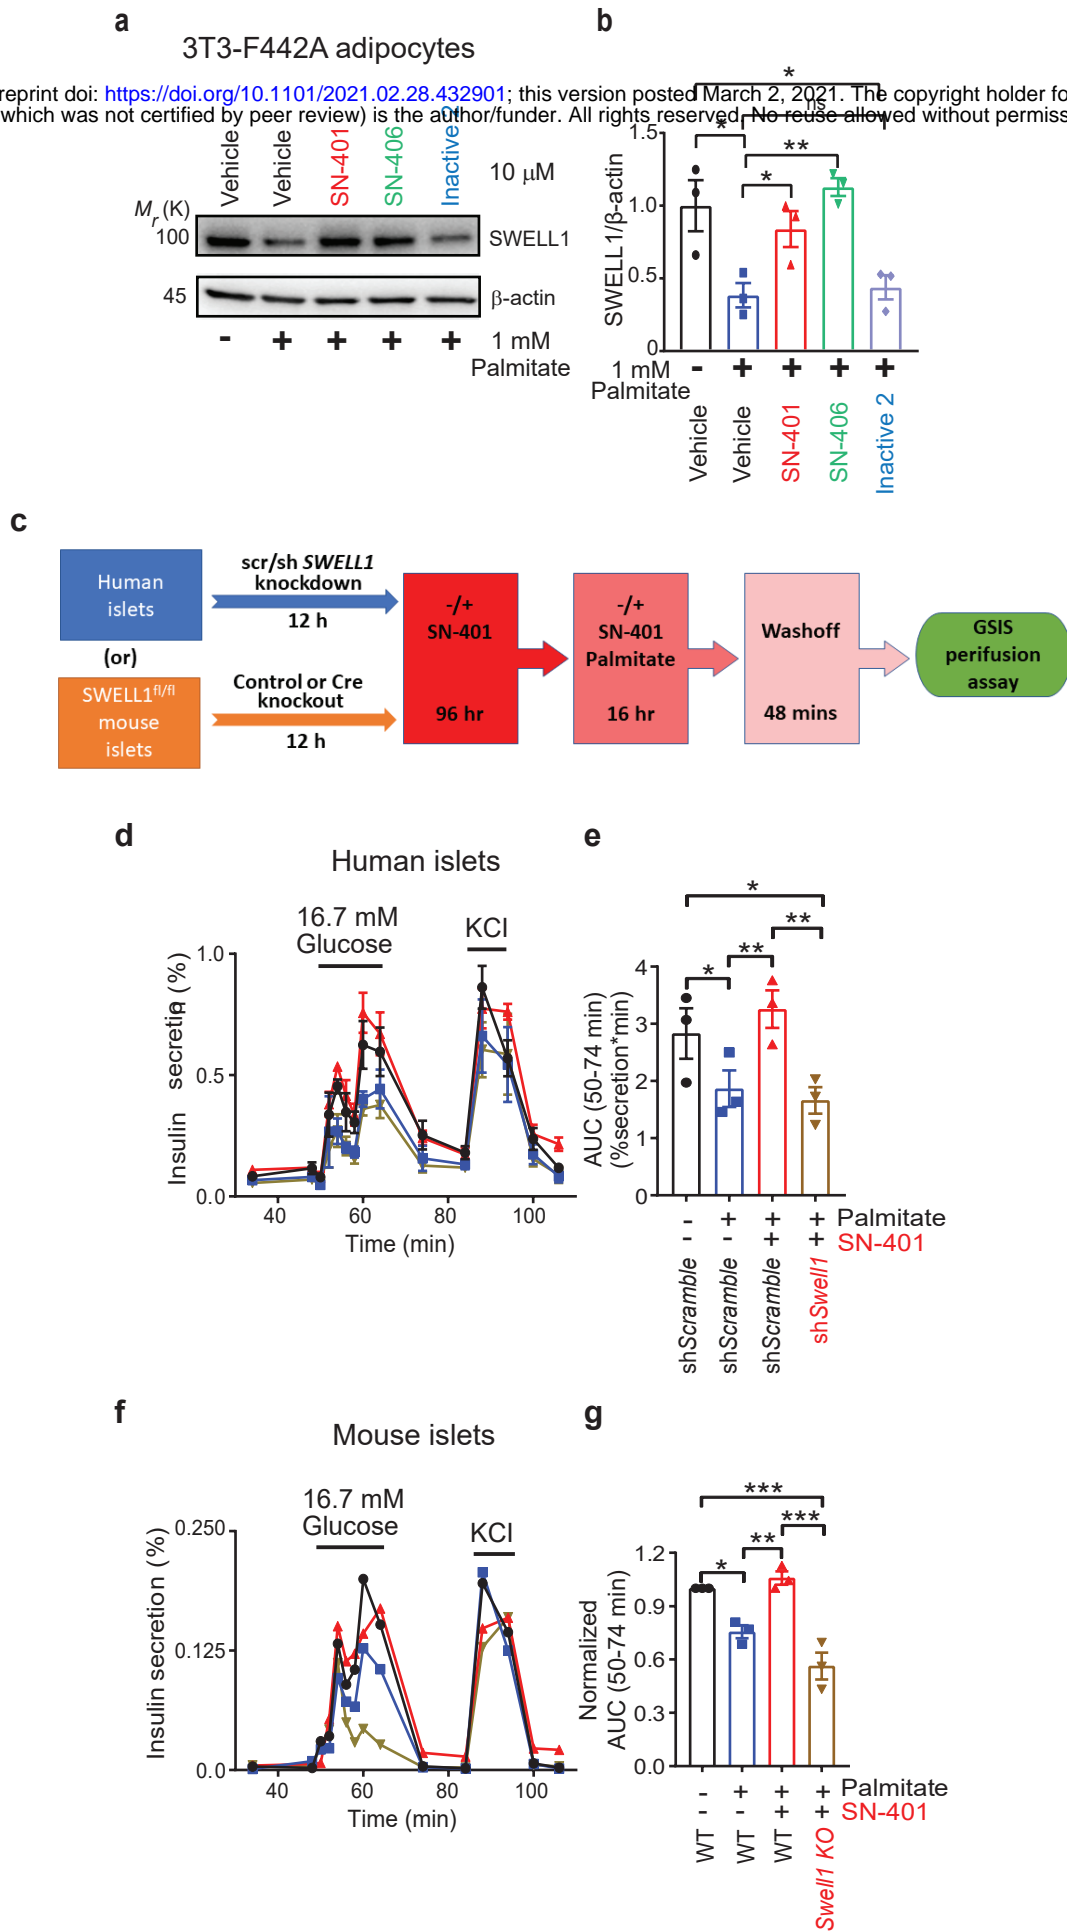

Figure 7



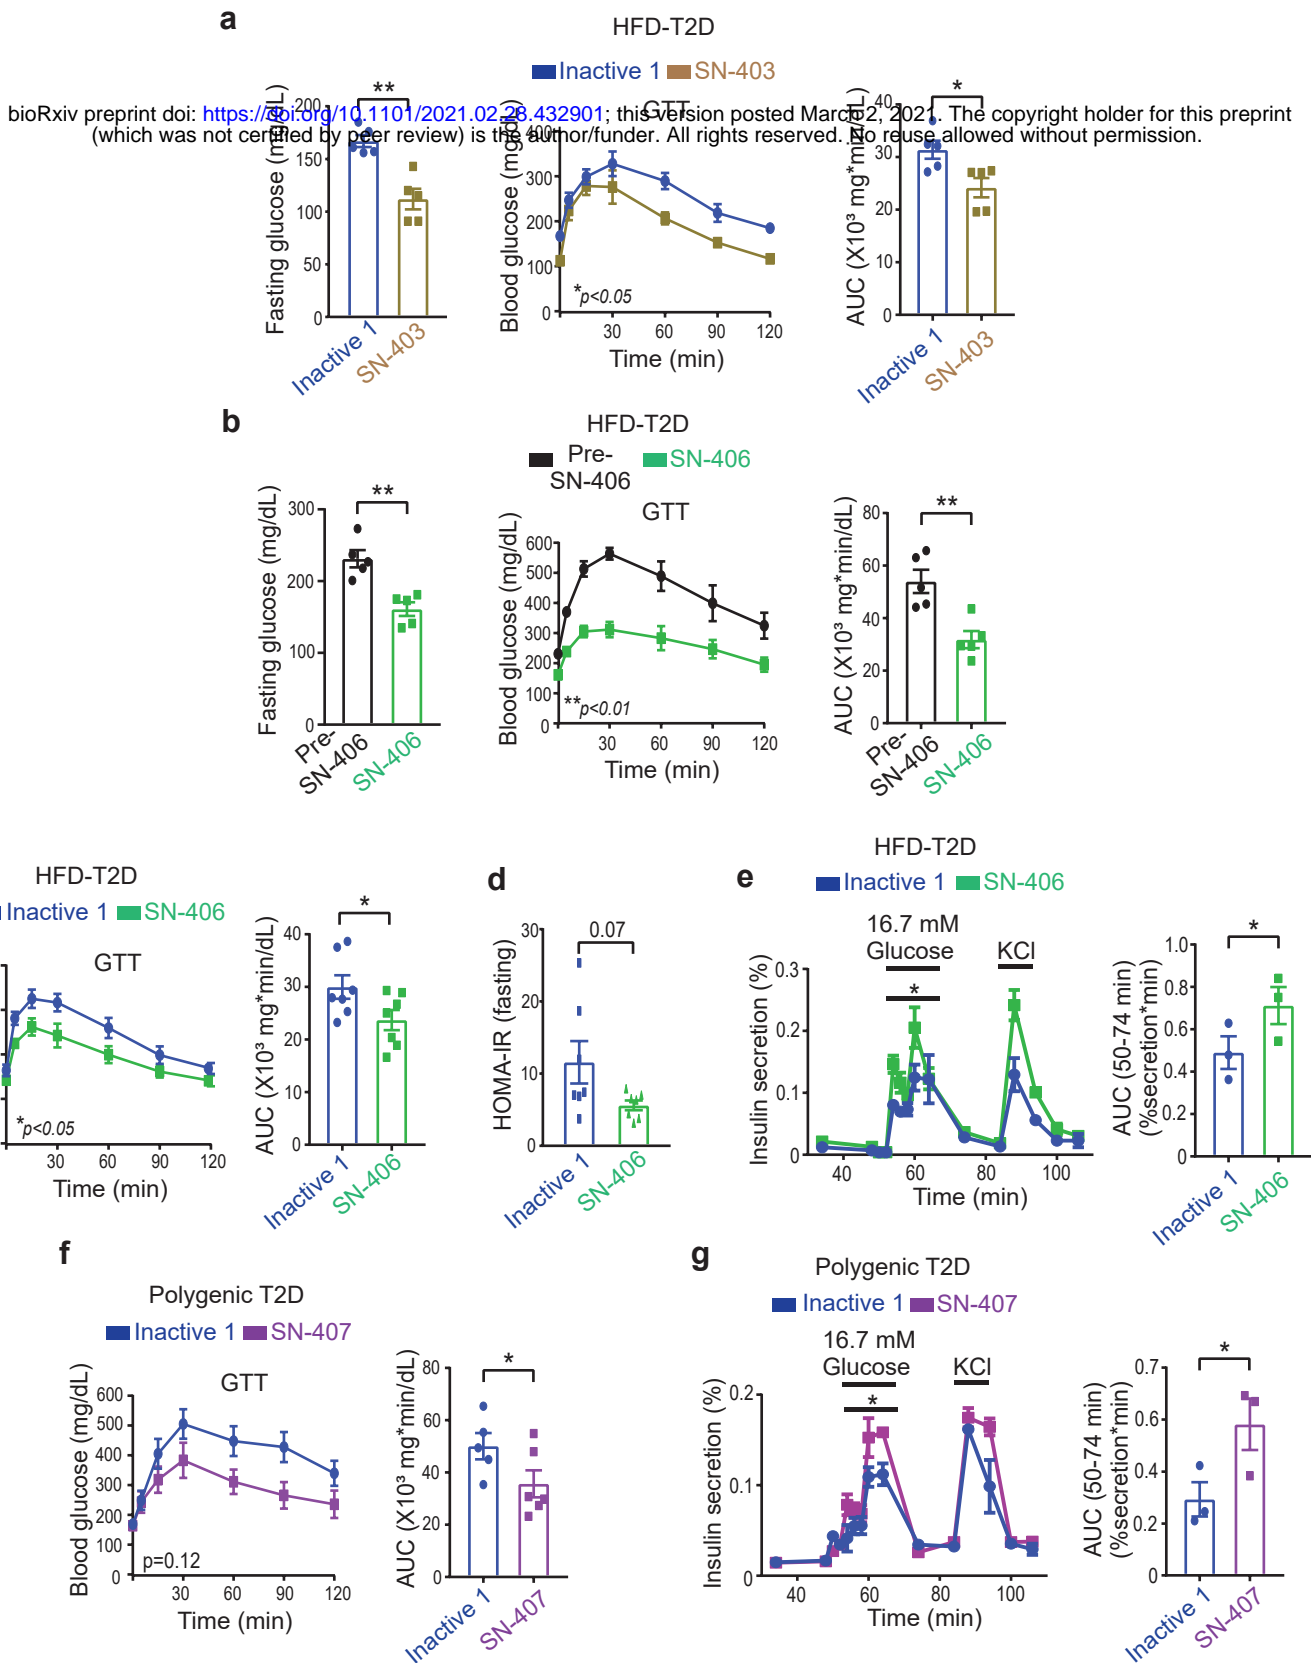

Figure 8

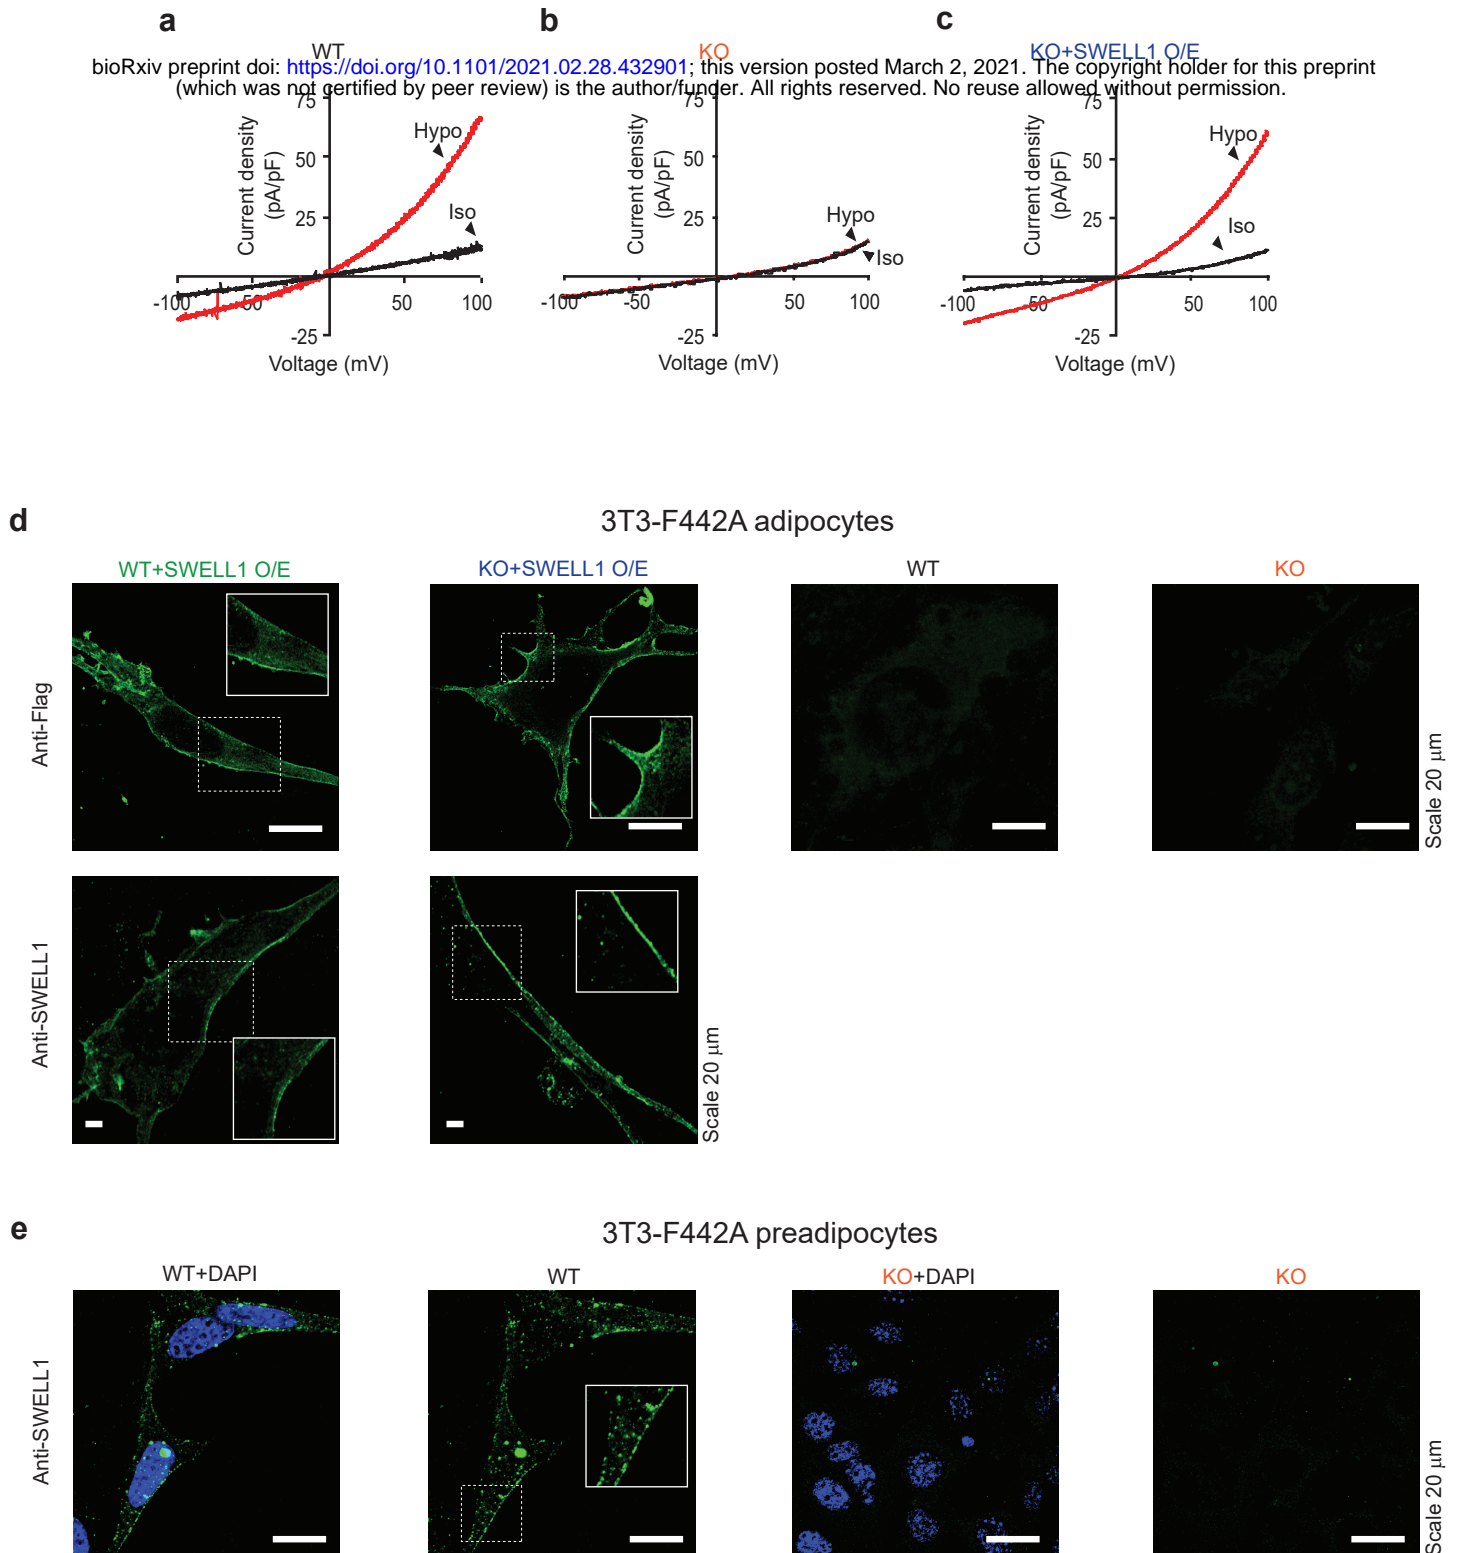

Supplementary Figure 1

**a**

3T3-F442A preadipocytes

bioRxiv preprint doi: <https://doi.org/10.1101/2021.02.28.432901>; this version posted March 2, 2021. The copyright holder for this preprint (which was not certified by peer review) is the author/funder. All rights reserved. No reuse allowed without permission.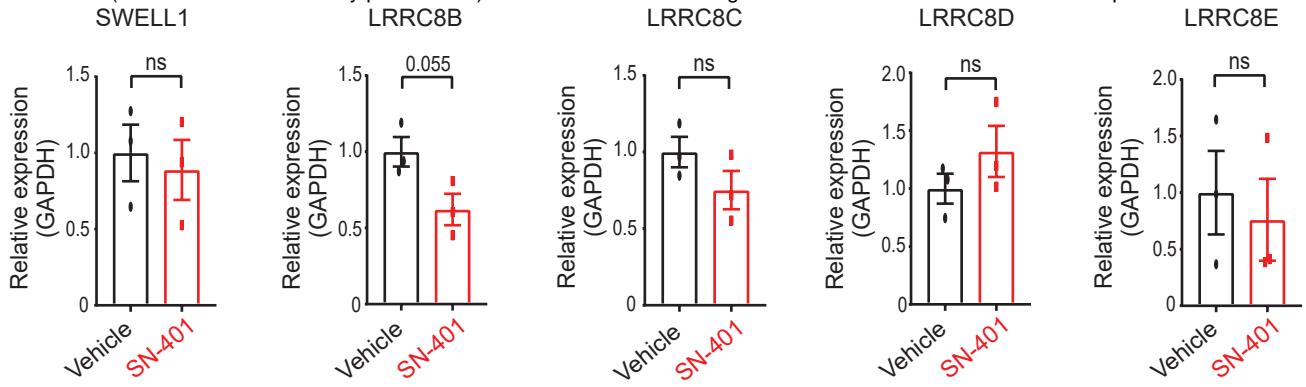**b**

3T3-F442A adipocytes

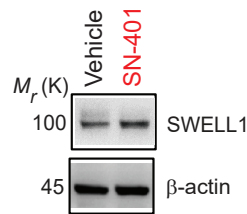**c**

3T3-F442A adipocytes

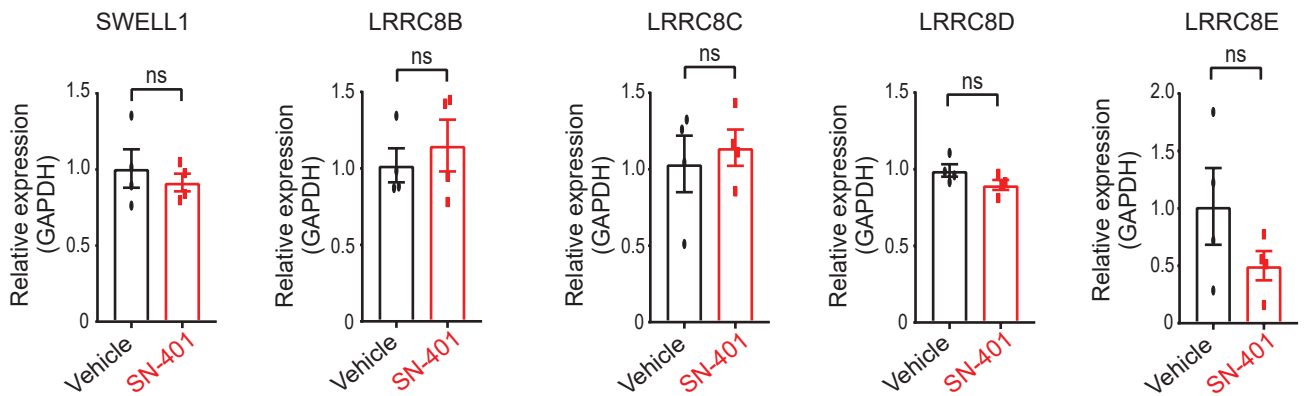

Supplementary Figure 2



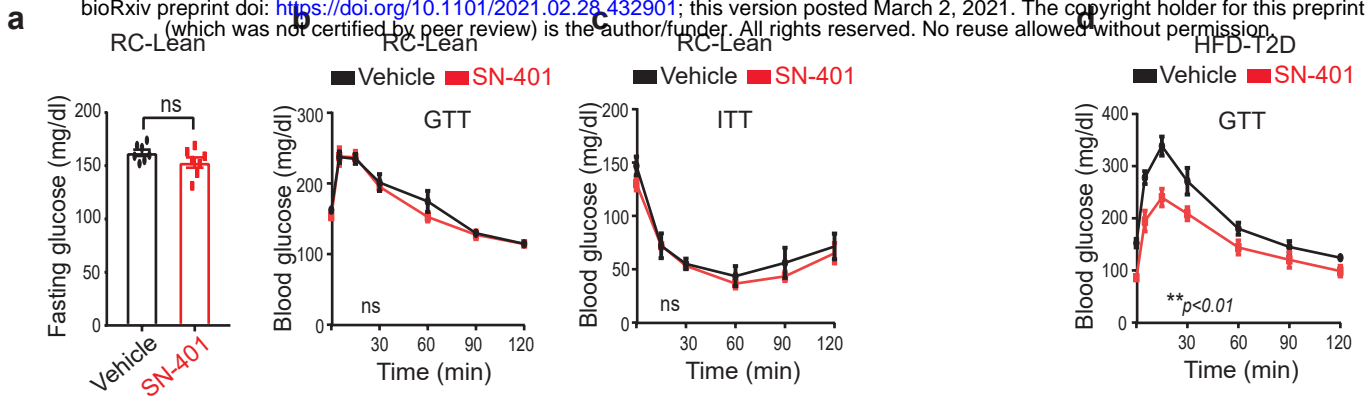

Supplementary Figure 3



Vehicle

SN-401

bioRxiv preprint doi: <https://doi.org/10.1101/2021.02.28.432901>; this version posted March 2, 2021. The copyright holder for this preprint (which was not certified by peer review) is the author/funder. All rights reserved. No reuse allowed without permission.

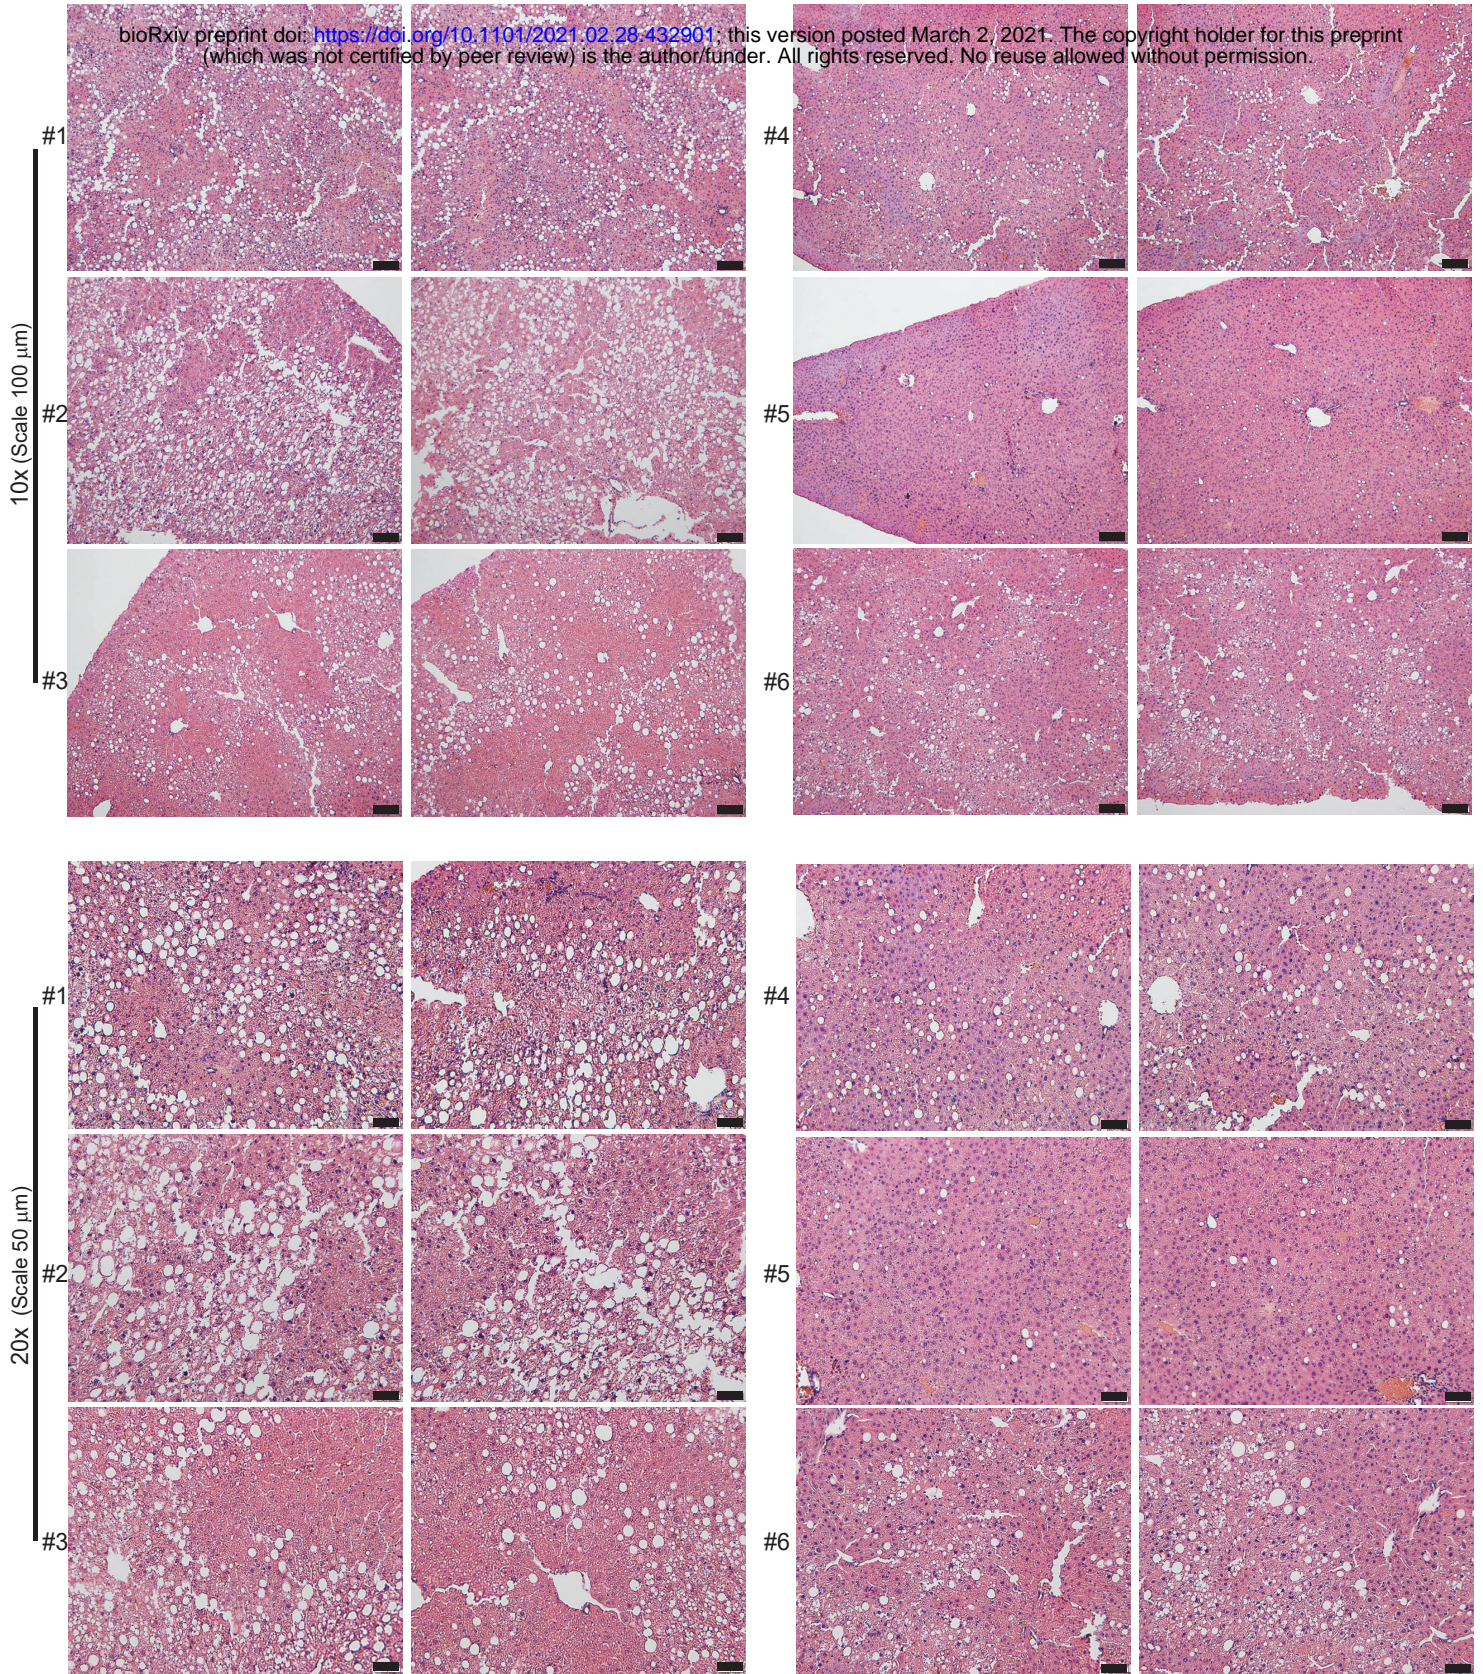

Supplementary Figure 4







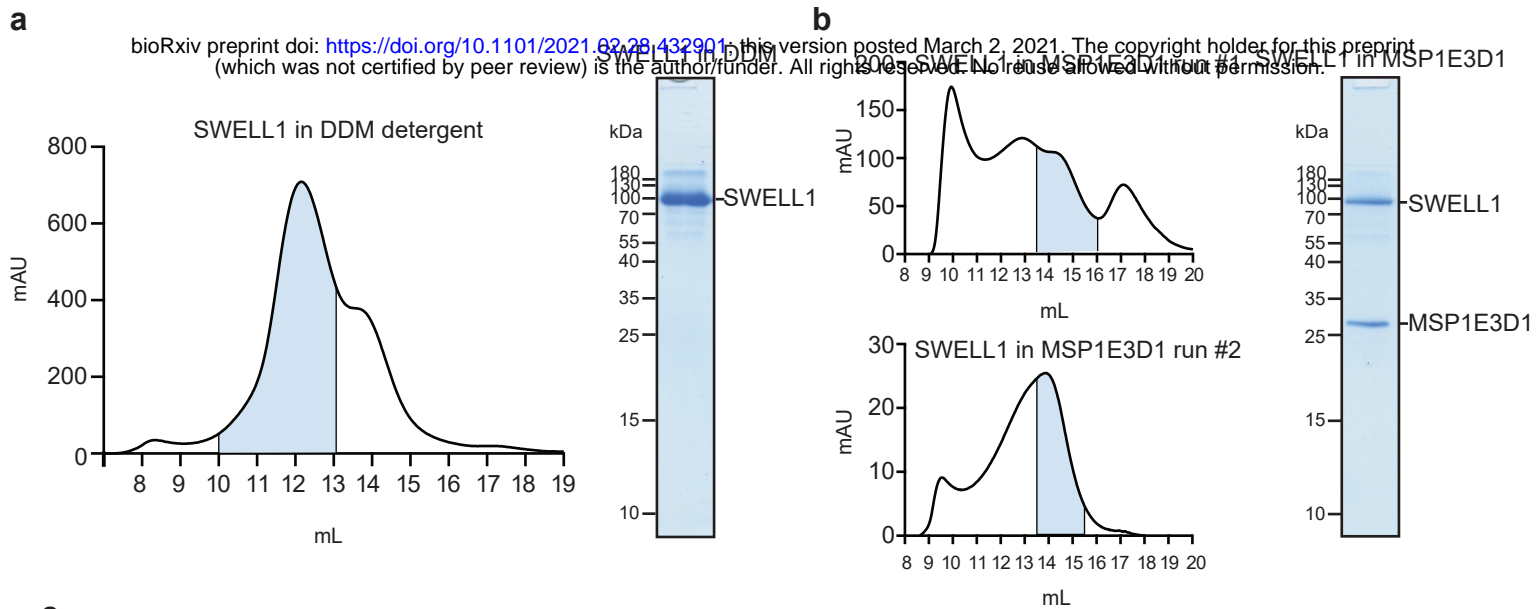

Supplementary Figure 6



bioRxiv preprint doi: <https://doi.org/10.1101/2021.02.28.432901>; this version posted March 2, 2021. The copyright holder for this preprint (which was not certified by peer review) is the author/funder. All rights reserved. No reuse allowed without permission.

bioRxiv preprint doi: <https://doi.org/10.1101/2021.02.28.432901>; this version posted March 2, 2021. The copyright holder for this preprint (which was not certified by peer review) is the author/funder. All rights reserved. No reuse allowed without permission.

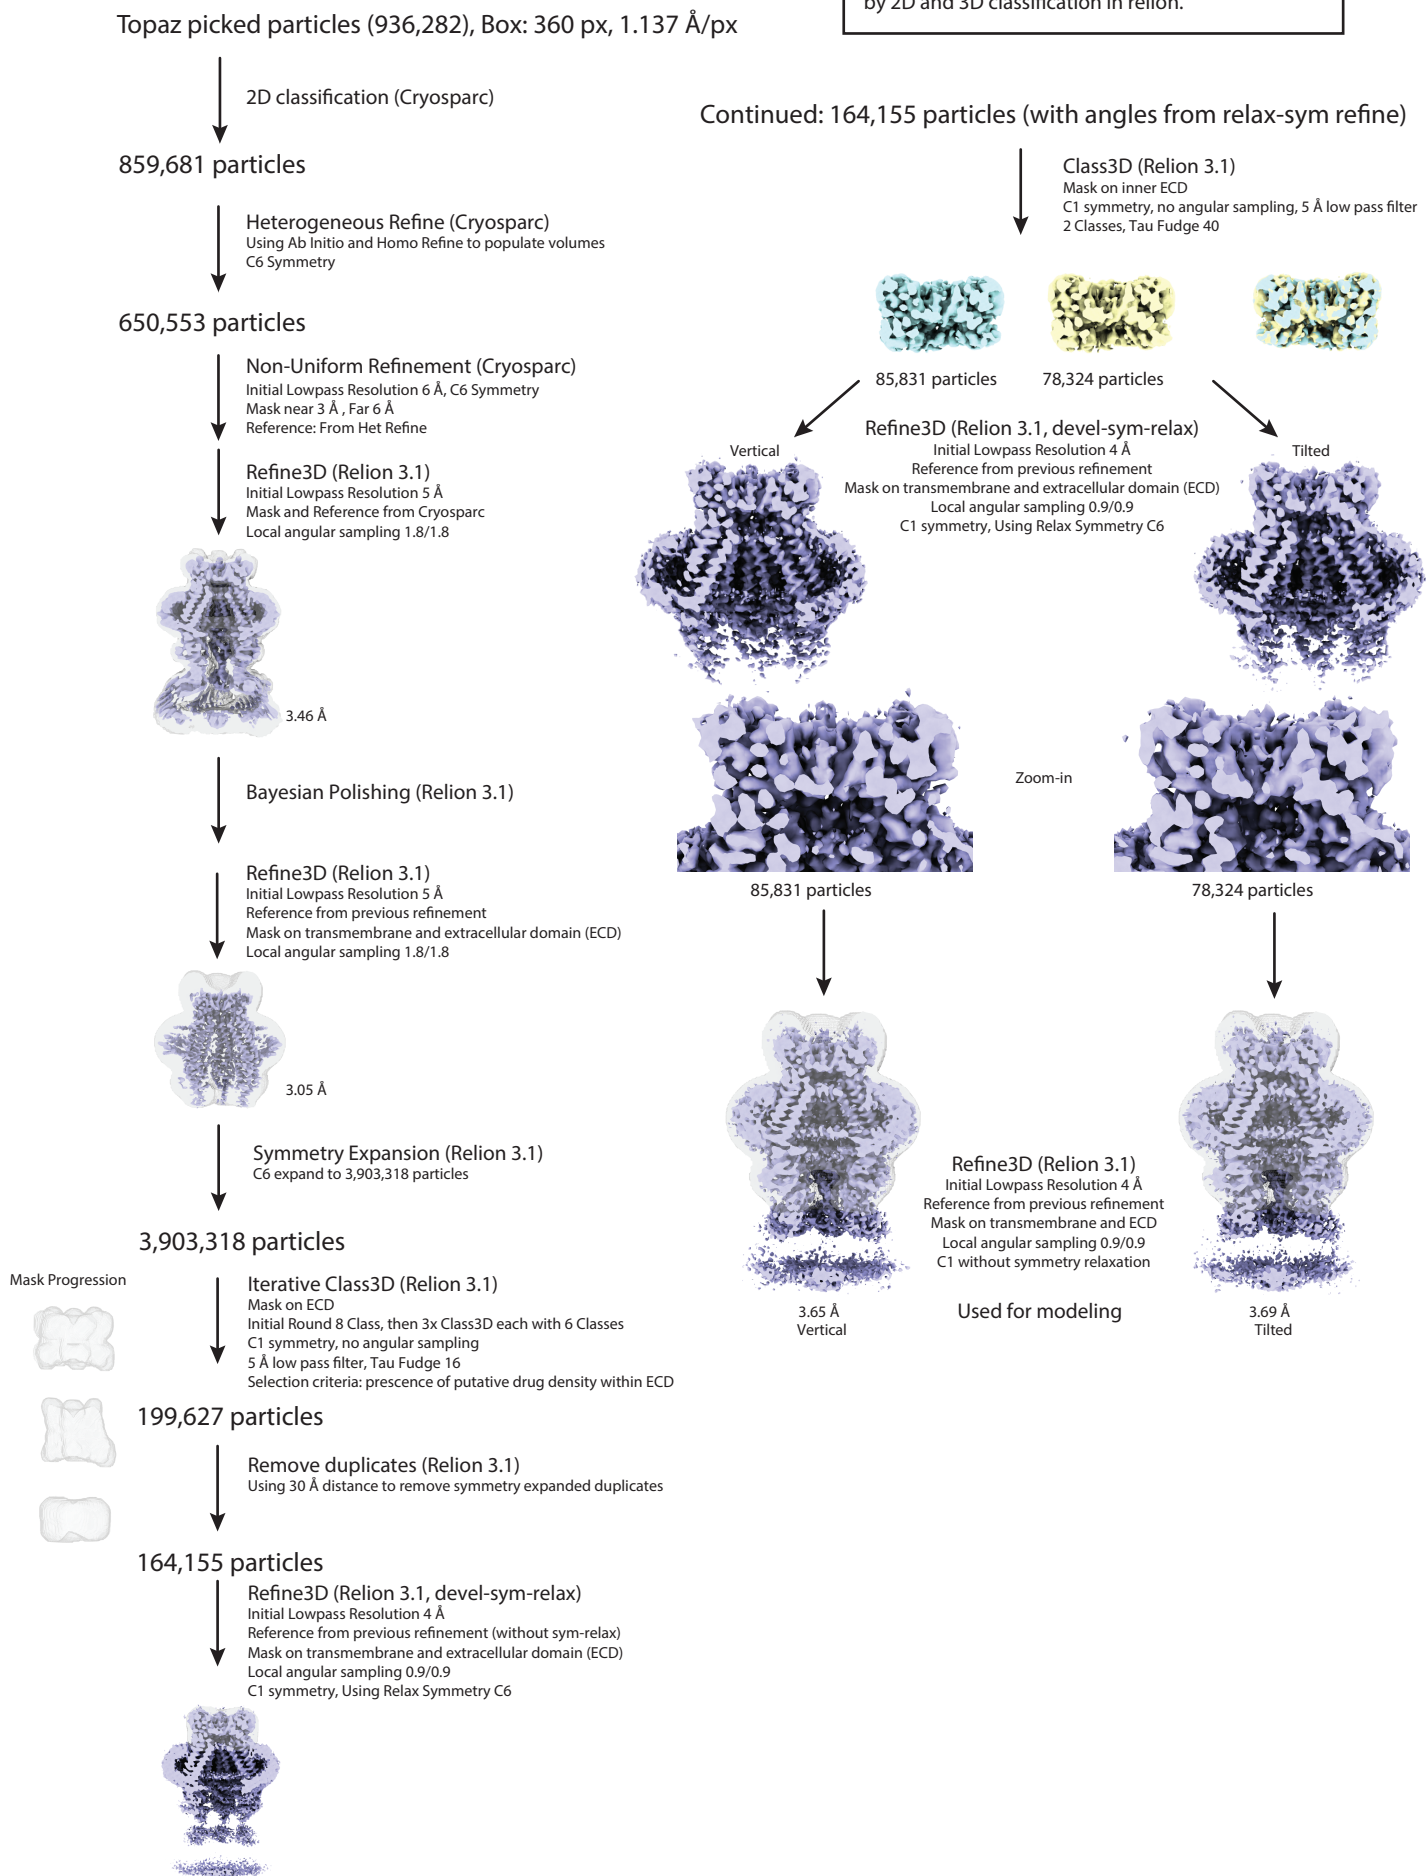

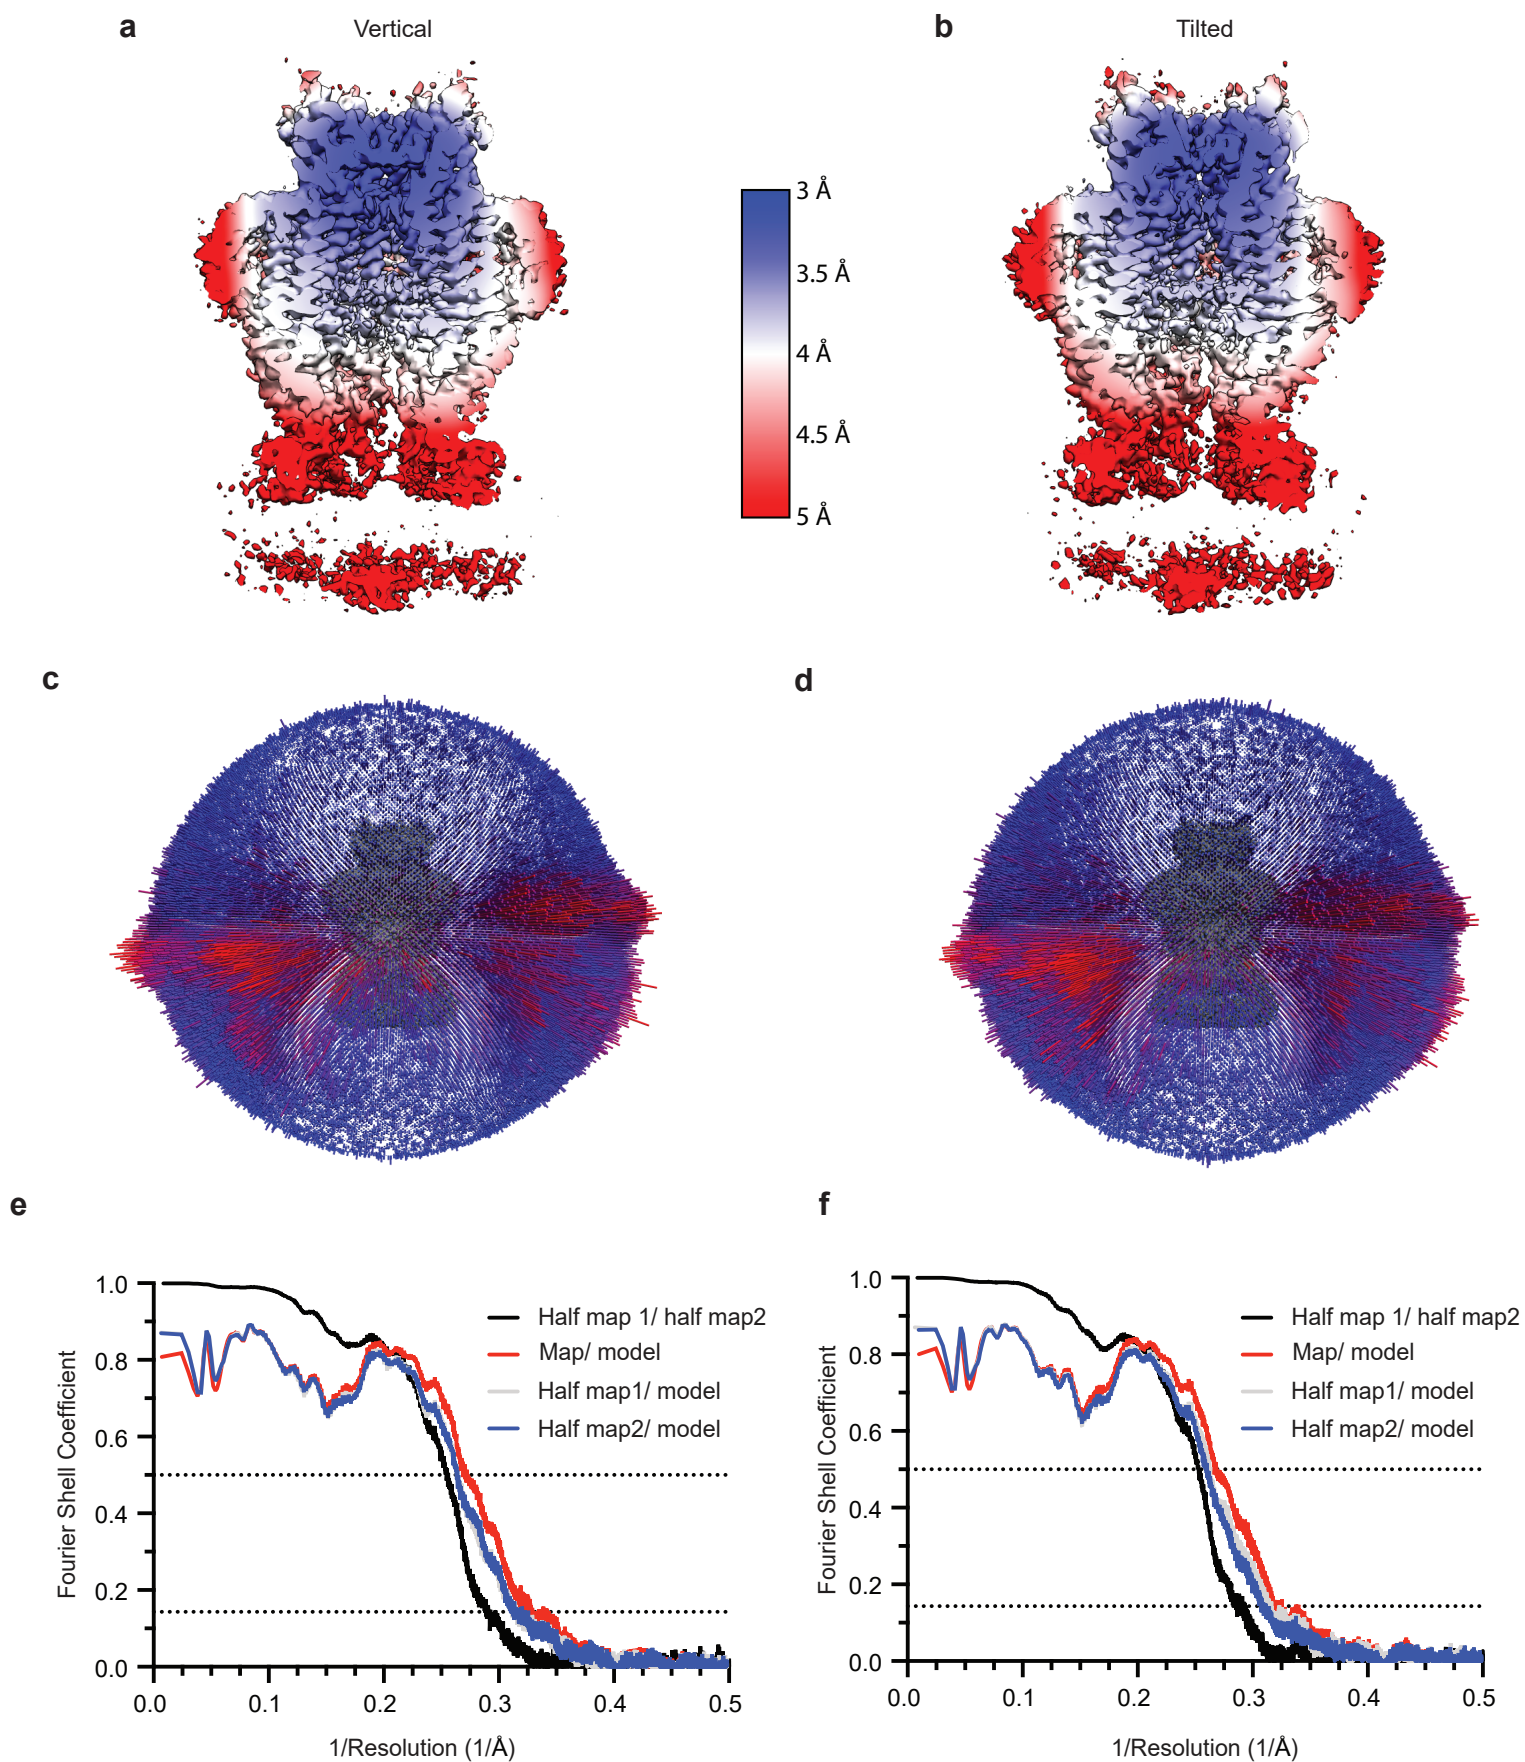

Supplementary Figure 8

**a****3T3-F442A preadipocytes**

bioRxiv preprint doi: <https://doi.org/10.1101/2021.02.28.432901>; this version posted March 2, 2021. The copyright holder for this preprint (which was not certified by peer review) is the author/funder. All rights reserved. No reuse allowed without permission.

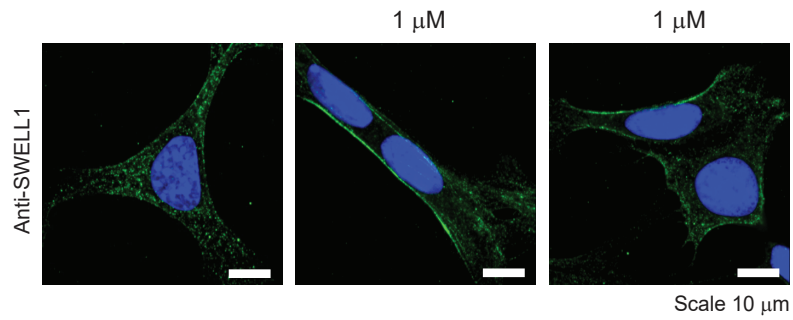**b****HUVECs**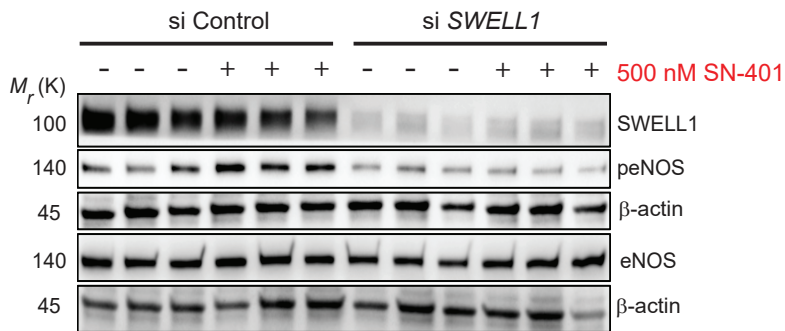**c**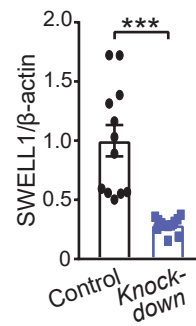**d**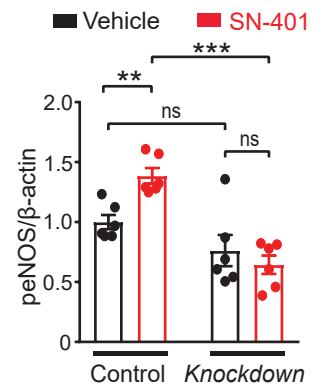**Supplementary Figure 9**



**a**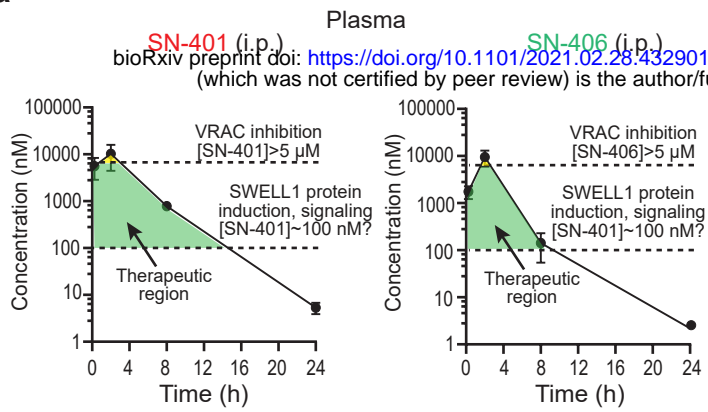**b**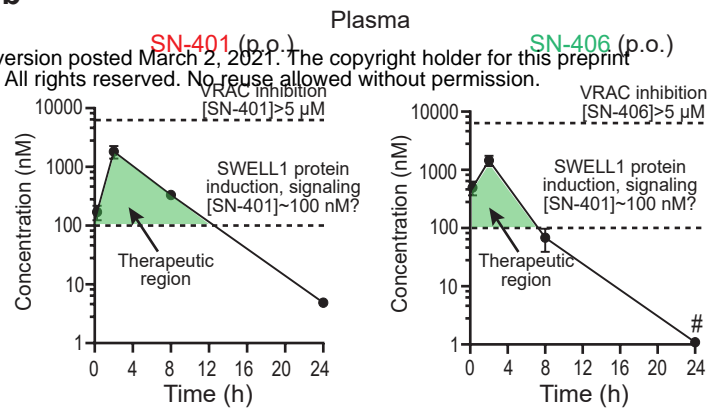**c**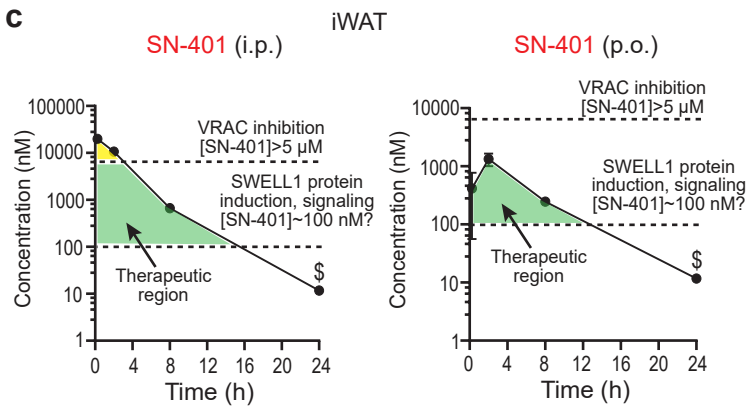**d**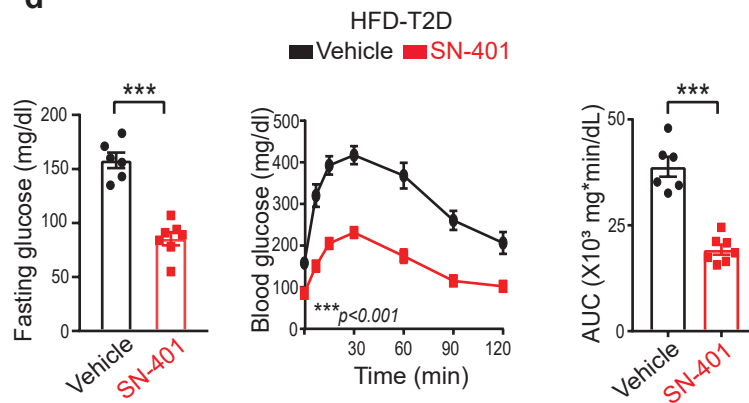

Supplementary Figure 10
